# Supplementary material for: Potential Regulatory Role of MicroRNAs in the Development of Bovine Gastrointestinal Tract during Early Life
Source: PubMed Central journal article supplement (PMC3969364; doi:10.1371/journal.pone.0092592), 2014-03-28
Supplement: pone.0092592.s001.pdf [file pone.0092592.s001.pdf]

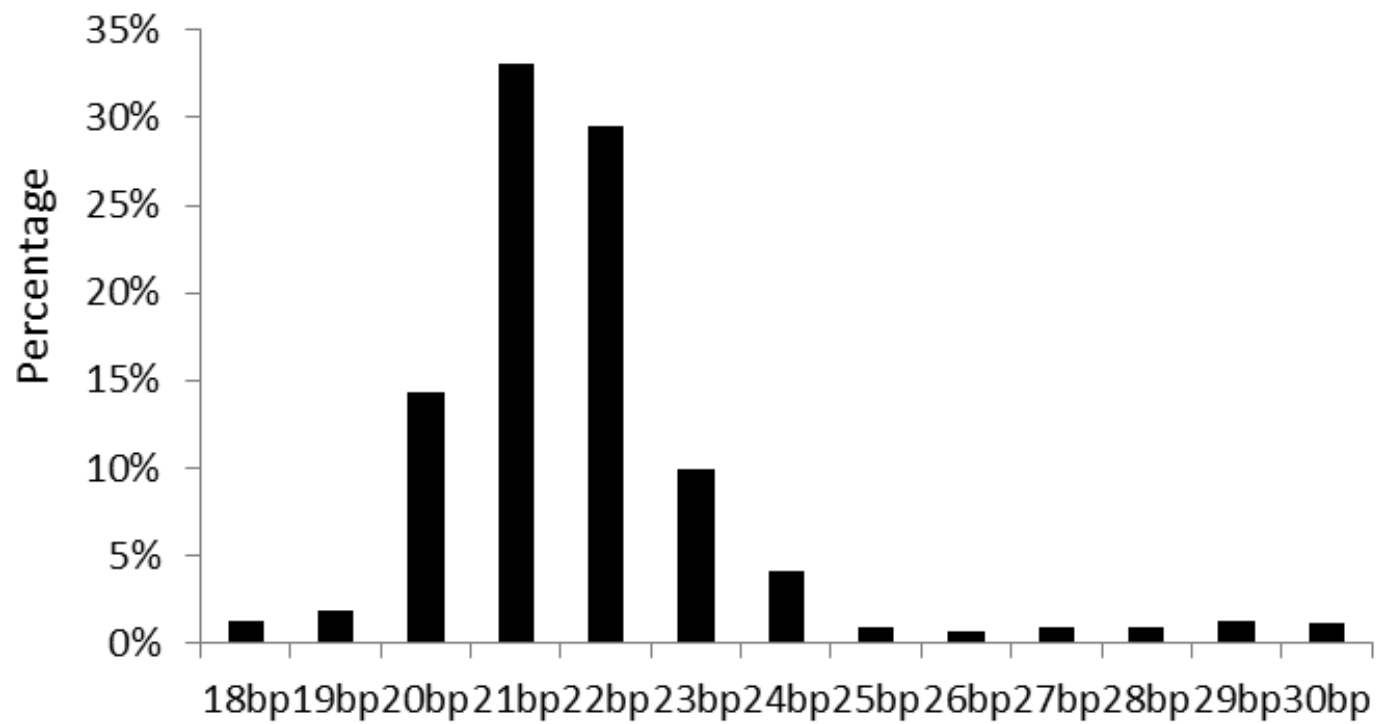

Liang et al. Figure S1
