# Supplementary material for: Potential Regulatory Role of MicroRNAs in the Development of Bovine Gastrointestinal Tract during Early Life
Source: PLoS One. 2014 Mar 28;9(3):e92592. doi: 10.1371/journal.pone.0092592 (PMC3969364; doi:10.1371/journal.pone.0092592)
Supplement: Table S1 — Identification of Novel miRNAs. The sequences of novel miRNAs identified from bovine gut were listed. (XLSX) [file pone.0092592.s002.xlsx]

## Sheet: Sheet1
>bta-miR-gx1
AAAAAACCGAGTGGACTTTTTG
>bta-miR-gx2
AAAAAAGTTTGTTTGGATTTTTT
>bta-miR-gx3
AAAAAAGTTTGTTTGGTTTTTA
>bta-miR-gx4
AAAAACAGGAATGAACTTTTTG
>bta-miR-gx5
AAAAACCTGAATGAACTTCTTG
>bta-miR-gx6
AAAAACCTGAATGACCCTTTTG
>bta-miR-gx7
AAAAAGTTCATTTGGGTTGTCT
>bta-miR-gx8
AAAAAGTTCGTTCGATTTTTCC
>bta-miR-gx9
AAAAATCTGAAAGAACTTTTTG
>bta-miR-gx10
AAAACCCTGATGAACTTTTTG
>bta-miR-gx11
AAAACCCTGATGAACTTTTTGA
>bta-miR-gx12
AAAACCTCAACGAACTCTTTGG
>bta-miR-gx13
AAAACCTGAAGAGACTTTTTGG
>bta-miR-gx14
AAAACCTGAATGAACTTATTGG
>bta-miR-gx15
AAAACCTGAATGAACTTTATGG
>bta-miR-gx16
AAAACCTGAATGAACTTTCTGT
>bta-miR-gx17
AAAACCTGAATGAACTTTTTCA
>bta-miR-gx18
AAAACCTGAATGAACTTTTTT
>bta-miR-gx19
AAAACTCGAGCAAACTTTTTGG
>bta-miR-gx20
AAAACTTGAATGTACTTTTTGG
>bta-miR-gx21
AAAAGGATGAAGAGTTAAAGT
>bta-miR-gx22
AAAAGTACGTTTGGGTTTTTCA
>bta-miR-gx23
AAAAGTTCGTTTGGGTTTTTCT
>bta-miR-gx24
AAAAGTTTGGTTGGGTTTTTCT
>bta-miR-gx25
AAAAGTTTGTTAGGATTTTC
>bta-miR-gx26
AAAATGCAGAACACTGACTATA
>bta-miR-gx27
AAACTTGAATGAACCTTTTGGC
>bta-miR-gx28
AAAGGTTCATTTGTGTTTTTCT
>bta-miR-gx29
AAATCTGAATGAACTTTTTGA
>bta-miR-gx30
AAATGTTCGCTTGGCTTTTTC
>bta-miR-gx31
AACCTCAAATGAACTTTCTGGCC
>bta-miR-gx32
AACCTGAATGAACTTTTTGGCC
>bta-miR-gx33
AACTGAGCGACTCACTCCCAAAC
>bta-miR-gx34
AACTGTTAGGAGGCTTGGCTGC
>bta-miR-gx35
AACTTTTGCCCCTAGTAACGGACT
>bta-miR-gx36
AAGAAGTTCGTTCAGGTTTTT
>bta-miR-gx37
AAGAAGTTTGTGCAGGTTTTTCT
>bta-miR-gx38
AAGCCACCAGAGCTCTGTCCTCA
>bta-miR-gx39
AAGCCCTGTGGTTACTGGATGCT
>bta-miR-gx40
AAGCTGCAAGCTGAAGAACTG
>bta-miR-gx41
AAGGCAGGTCTCTGGGCT
>bta-miR-gx42
AAGTTCCTCCTCTGACTCAGCC
>bta-miR-gx43
AAGTTTAAAGAAGTCTGCCTTG
>bta-miR-gx44
AATAGCTCAGAATGTCACTTCTG
>bta-miR-gx45
AATGGATTACTTCTGATTGCT
>bta-miR-gx46
ACAAAGTTCGTTCAGGTTTTTT
>bta-miR-gx47
ACAAAGTTTGTTCGGGTTTTA
>bta-miR-gx48
ACAACCTGAATGAACTTTTTGA
>bta-miR-gx49
ACACCAAGCTGTAGGTCTGAGC
>bta-miR-gx50
ACACGCGTCCTTGGATCCTGACT
>bta-miR-gx51
ACAGAGGAGCTTTTGACATGAAC
>bta-miR-gx52
ACAGGCTCTGGAACACGGGAGC
>bta-miR-gx53
ACAGGGGATGGTCTGGGCTGG
>bta-miR-gx54
ACCAGGGCTGGAAGCTGCTTCT
>bta-miR-gx55
ACCGATTGTGGAATGCAGCAT
>bta-miR-gx56
ACGGCCTGGGGCCCTCCGGAGC
>bta-miR-gx57
ACGGTCCCTCTGTTCCCACAGG
>bta-miR-gx58
ACTAGTCACATGTAACTTACT
>bta-miR-gx59
ACTCAAAACATGGCGGCACTT
>bta-miR-gx60
ACTCCTGCAGCATCTGTTCCGAGA
>bta-miR-gx61
ACTGGACTAGGAGTCAGCAG
>bta-miR-gx62
ACTGGACTTGGAGTCAGA
>bta-miR-gx63
ACTGGTCTTGGATTCAGAAG
>bta-miR-gx64
AGAAACCTGGATGAACTTTT
>bta-miR-gx65
AGAACCTGAATGAACTTTCTGG
>bta-miR-gx66
AGAATTGCGTTTGGACAATCAGT
>bta-miR-gx67
AGAGGACACCGTCTGAGTGGT
>bta-miR-gx68
AGAGTGACCTGTGCGGCTGCCA
>bta-miR-gx69
AGAGTTGAGTCTGGACGTCCCG
>bta-miR-gx70
AGCCCGTCATGGCCCTGGCCT
>bta-miR-gx71
AGCCCTCACGTAGCCGGAAGCCT
>bta-miR-gx72
AGCTGGAGGGCCTGGCCT
>bta-miR-gx73
AGGACCTGACTTGCTGTGGCCAGC
>bta-miR-gx74
AGGACTGAGCCCTGGGCC
>bta-miR-gx75
AGGGGCCGCCCCCGTGGGGC
>bta-miR-gx76
AGTAGGGCAGGCCTGAAGCC
>bta-miR-gx77
AGTTGTAGACTGAATTTCAAGT
>bta-miR-gx78
ATAAATTCGTTTGGATTTTT
>bta-miR-gx79
ATAGCCAGTTGGGGAAGAATGC
>bta-miR-gx80
ATCAATGAACTTTTTGGCCAGC
>bta-miR-gx81
ATCGAGAGCCGTCGCACTAAG
>bta-miR-gx82
ATCTTCCATGGCTGGGTGCTGC
>bta-miR-gx83
ATGCGGGTGCAGGGCCTGAGAGC
>bta-miR-gx84
ATGGACTGGAAGCCGACCC
>bta-miR-gx85
ATGTCCGCGGGTTCCCTGTCCCA
>bta-miR-gx86
ATGTGGGGTTGTAGGGCCC
>bta-miR-gx87
ATTCTGACAGACTGGAGTCTGA
>bta-miR-gx88
ATTGGAAGACACTCTGCAACAAGA
>bta-miR-gx89
ATTGGCATGTCTTGGAATGA
>bta-miR-gx90
ATTTCCTAGCGTGTTGGGTACT
>bta-miR-gx91
CAAAAAGTTCGTCCAGATTTTT
>bta-miR-gx92
CAAAAAGTTTGTTTGGGTTTTT
>bta-miR-gx93
CAAAAGTTCATTCGGATT
>bta-miR-gx94
CAAAAGTTCGTTCGGGTTTTTT
>bta-miR-gx95
CAAACCGGAATGAACTTTTTGG
>bta-miR-gx96
CAAATGAACTTTTTGGCCAACC
>bta-miR-gx97
CAACAAGTTTGTTTGGGTTTTT
>bta-miR-gx98
CAACCCTGAATGAACTTTTTGG
>bta-miR-gx99
CAACCTGAATGAACTTTTTGG
>bta-miR-gx100
CAAGGTGCTCTATCCCCTTGGCT
>bta-miR-gx101
CACAAAGTTCGTTCAGATTTTT
>bta-miR-gx102
CACACTCAGATAAAGTAGGCACT
>bta-miR-gx103
CACAGCTCCAGGGGACGCCGTT
>bta-miR-gx104
CACATGGAGTTGCTGTTACA
>bta-miR-gx105
CACCTAGAGACCGTTGGCTATT
>bta-miR-gx106
CACCTAGTGCATGGTCTTGGGC
>bta-miR-gx107
CACCTGGTTGATCCTGCC
>bta-miR-gx108
CACTCTGTGCAGCCGCTCCAGG
>bta-miR-gx109
CAGCACTGTCCGGTAAGATGTC
>bta-miR-gx110
CAGGATCCAAGGACGCGTGTGTT
>bta-miR-gx111
CCAAACCAGTTGTGCCTGTAGA
>bta-miR-gx112
CCACCTGGCCTGACAGCACCCT
>bta-miR-gx113
CCATCCTCAGCAGTAGGGACTCT
>bta-miR-gx114
CCCAAGTGAACTTGTTGGCC
>bta-miR-gx115
CCCAGGCAGAACGCAAGGTCT
>bta-miR-gx116
CCCAGGGATGTAGCTCCTAGTGC
>bta-miR-gx117
CCCGCGGGTCGCCAGGGCC
>bta-miR-gx118
CCCTCTGACGCTGCCCTTCCCCAGC
>bta-miR-gx119
CCCTGCCACCTGTCTCCCCCAGA
>bta-miR-gx120
CCGAGCCTGACAGATCACACA
>bta-miR-gx121
CCGCCTCCCGGGTCCGATCCT
>bta-miR-gx122
CCGCCTCCTGCCTGTGGCGCCC
>bta-miR-gx123
CCGGCCCCGCGAGCTCCCCGCGA
>bta-miR-gx124
CCGGGCCTGGGCCGAGCCCCA
>bta-miR-gx125
CCGGGTAGGGCTGTGACCCTCG
>bta-miR-gx126
CCTCAGCTAAAGGTCGACCGGC
>bta-miR-gx127
CCTCCAGGGCTAGGAGGTGGTCA
>bta-miR-gx128
CCTCCGCCCCGCGCTCGCCTCG
>bta-miR-gx129
CCTCGCCCGCCCGCCGGC
>bta-miR-gx130
CCTGGACTTGGGGTCAGAAG
>bta-miR-gx131
CCTGGCCTTGGAGTCAGAG
>bta-miR-gx132
CCTGTGAGGGCTTCACCCTGGACT
>bta-miR-gx133
CGCCCCACCGCGCCCGCC
>bta-miR-gx134
CGCGCGCCGGCGGCCGCG
>bta-miR-gx135
CGCGCTGCATGCCGGGAGGCT
>bta-miR-gx136
CGGAATGCTCTGTACAAACAAT
>bta-miR-gx137
CGGCAGCTCACCTGGGCCC
>bta-miR-gx138
CGGCCCCAGAGTGGGAGGACT
>bta-miR-gx139
CGGCGCGCGCGTGCGGGC
>bta-miR-gx140
CGGCGGCGGCGGCGACTC
>bta-miR-gx141
CGGGTTTCCGTAGGAATC
>bta-miR-gx142
CGGTTTACCGTCCCACATACATA
>bta-miR-gx143
CGTGGGCTGCCCCCTCCCCAGC
>bta-miR-gx144
CTCGCTCTCTGGCCCCGCAGG
>bta-miR-gx145
CTGACAGAGGAAGTGCCCTCA
>bta-miR-gx146
CTGACCCAGGAATTGACA
>bta-miR-gx147
CTGCGCAAAGCGTCGGGCCC
>bta-miR-gx148
CTTCCTGCTCCACTCTGCC
>bta-miR-gx149
CTTGCTGAGTGACCTCCCTGCT
>bta-miR-gx150
GAAAACCTGAACAAACTTTTTG
>bta-miR-gx151
GAAAAGTTCGTTCGAGTTTTC
>bta-miR-gx152
GAAAAGTTCGTTTGGGTTTT
>bta-miR-gx153
GAAAAGTTTGTTTGGGTTTTTC
>bta-miR-gx154
GAAAGTTAGTTTGGATTTTTC
>bta-miR-gx155
GAAAGTTAGTTTGGATTTTTCT
>bta-miR-gx156
GAAAGTTTGTTGGGGTTTTT
>bta-miR-gx157
GAACGAAATCCAAGCGCAGCTG
>bta-miR-gx158
GAACTGAGTCCTTTGGAAAAGA
>bta-miR-gx159
GACCTGTGCGTGTACACTCATG
>bta-miR-gx160
GAGCCAGCGGCCGGACCT
>bta-miR-gx161
GAGCTCATCAGACTGATGTT
>bta-miR-gx162
GAGGAGGGGCGCGCTGTGCTC
>bta-miR-gx163
GCGGCCCGCGGGCTCGGATGCT
>bta-miR-gx164
GGAGAGATCACGGCACTG
>bta-miR-gx165
GGCGGCGGCGGCGCCGGGGCG
>bta-miR-gx166
GGGGGCCGGCGGCGGCGGCGGC
>bta-miR-gx167
GGGGGCCTCAAGGAGGAG
>bta-miR-gx168
GGGGGCGGGGGGAGGCCT
>bta-miR-gx169
GGGGGTATAGCTCAGTGGTAGAGT
>bta-miR-gx170
GGTCTGCCGGGCGTCGGC
>bta-miR-gx171
GGTGGGCCGGCGGCGGCG
>bta-miR-gx172
GTCAGTAGGATCAAAAGACTAC
>bta-miR-gx173
GTCCCTGTTCGGGCGCCA
>bta-miR-gx174
GTCGAGTCATCGTTGGGCCT
>bta-miR-gx175
GTCGGTGCGTGCGTGCGTGC
>bta-miR-gx176
GTCTAGTCCGAAAAAGAATAA
>bta-miR-gx177
GTGCCTGGCTGTGGACAGC
>bta-miR-gx178
GTGGCTGCCTCTAGGGTG
>bta-miR-gx179
TAAAAAGTTTGTTTGGGGTTTT
>bta-miR-gx180
TAAAAGTTCGTTTGGGTTTT
>bta-miR-gx181
TAAAAGTTTGGTTGGGTTTTT
>bta-miR-gx182
TAGGCAGAGATGACAGTCATACTG
>bta-miR-gx183
TAGGCTCTAGAGTGTGTGGGC
>bta-miR-gx184
TATTATTCCATACTTAAGGCT
>bta-miR-gx185
TCAAAAATTCGTTCGGGTTTTT
>bta-miR-gx186
TCAAAAGTTTTAAAGCAGTCA
>bta-miR-gx187
TCAAGGTCCGCTGTGAACACGC
>bta-miR-gx188
TCAAGGTCCGCTGTGAACACGG
>bta-miR-gx189
TCACGCCCTGCTCTGACCCCAGT
>bta-miR-gx190
TCACTGGGCATCCTCTGCTTTAT
>bta-miR-gx191
TCAGACCCATATTCTCATAGGCC
>bta-miR-gx192
TCAGTAACAAAGATTCATCCTTG
>bta-miR-gx193
TCAGTGGCAGAGTGCAGGGACCTC
>bta-miR-gx194
TCCACACCGGTGAGAAGGACT
>bta-miR-gx195
TCCACATCCCTCACAGTTTGGT
>bta-miR-gx196
TCCAGTGGTTAAGAATCTGCCT
>bta-miR-gx197
TCCATCCCCTCTTGCCCACCAGT
>bta-miR-gx198
TCCCCAGAAGTGCCCCTGCAA
>bta-miR-gx199
TCCCCTTCCTTCCGGCCTCCGCCC
>bta-miR-gx200
TCCCTACCTCTTCCCTCCAGC
>bta-miR-gx201
TCCTAGGGGATTGACATAGTCTGT
>bta-miR-gx202
TCCTCCCCTGGTCCTCCACAGA
>bta-miR-gx203
TCGAACAAACTTTTTGGCCAAC
>bta-miR-gx204
TCGAGCCTGACAGATCACACA
>bta-miR-gx205
TCGAGGAGCTCACAGGCTCA
>bta-miR-gx206
TCGTGCCCACGCTATCCTCCAGG
>bta-miR-gx207
TCTACCCGTGATCGCTCAGCTT
>bta-miR-gx208
TCTAGAAGCTCACAGTCTAGA
>bta-miR-gx209
TCTCATCATCCTTCTTCCCCAGA
>bta-miR-gx210
TCTCTCAGCTCTGCATGGTTGCACT
>bta-miR-gx211
TCTGACCCTGCCCTGGCTGCCT
>bta-miR-gx212
TCTGAGCCTGCCTCGTCCCCAGA
>bta-miR-gx213
TCTGCATCCGAGGACTCAACCC
>bta-miR-gx214
TCTGCCCACTGTTTCTTTCCAGC
>bta-miR-gx215
TCTGCCTGGCTCTGTCCCCAGT
>bta-miR-gx216
TCTGGGACCCCGATTCTCTCCAC
>bta-miR-gx217
TCTGTGGACGGAGACCCCGCCT
>bta-miR-gx218
TCTGTTGCCCGTCGTAGCTGGC
>bta-miR-gx219
TGAAAAGTTCCTTCGGGTTTTC
>bta-miR-gx220
TGACCCCTGTCCTCTCTGCAGC
>bta-miR-gx221
TGACGCTGAACTCTGGCCTTCC
>bta-miR-gx222
TGACTAGGGACTGGCCCCGGGG
>bta-miR-gx223
TGAGAGGTCTGTAATAACTAACA
>bta-miR-gx224
TGAGATGAAGCAGTGTAT
>bta-miR-gx225
TGAGATGAAGCATTCTAG
>bta-miR-gx226
TGAGGGGCAGAGAGCCAGAG
>bta-miR-gx227
TGAGGGGCAGAGAGTGAGAA
>bta-miR-gx228
TGATTGGTACTTCTTAGAGTGG
>bta-miR-gx229
TGCACCTCGCGCGGCCGCCGCT
>bta-miR-gx230
TGCCAGACGGTCTCTGCCCTGC
>bta-miR-gx231
TGCCCTGCAGCTTCCTAGGCT
>bta-miR-gx232
TGCCTTCCACCTCTGCCCCCAGG
>bta-miR-gx233
TGCTGAAACTCTGTTCAACCC
>bta-miR-gx234
TGGAGCACAGTCACAGTGACTG
>bta-miR-gx235
TGGCACCAGCACTGGCGGTGG
>bta-miR-gx236
TGGGCGGAGGTGGGGCAGGGGGCC
>bta-miR-gx237
TGTCACTCGGCCCACTACCCA
>bta-miR-gx238
TGTCCCCGAGACTGTAGCCAGA
>bta-miR-gx239
TGTCTCAGTTCAGCAGGAAG
>bta-miR-gx240
TGTGTCCAATAATAGGGGATTGC
>bta-miR-gx241
TTACAATACAACCTGATAAGTGC
>bta-miR-gx242
TTATTTTTGACGTCCCAGAACA
>bta-miR-gx243
TTCCCACCGTTAATTTCAGGCTG
>bta-miR-gx244
TTCCCGCCGGCGTATGCTGCTGT
>bta-miR-gx245
TTCGGCGCCACCACCCTGCGGGTCG
>bta-miR-gx246
TTCTCAGGTTGGACAGTCCTGA
>bta-miR-gx247
TTCTCATTGGCCTCACGTCCTG
>bta-miR-gx248
TTCTCTAGTGTGTTTTCCCAAC
>bta-miR-gx249
TTCTGACCGCTCTTGTCGGCT
>bta-miR-gx250
TTGAGCCTGACAGATCACACA
>bta-miR-gx251
TTGCATGACTCTGAGAGTAAGT
>bta-miR-gx252
TTGCTCCCTCCACACCTCCAGA
>bta-miR-gx253
TTGGCTCTGTGAGGTCGGCTCA
>bta-miR-gx254
TTGGGAAGCACAGACACTAGGAC
>bta-miR-gx255
TTGTCCTACTTCTCAGCTGTCT
>bta-miR-gx256
TTTCCTCTCTGCCCCATAGGGTG
>bta-miR-gx257
TTTGCAGTAACAGGTGTGAAC
>bta-miR-gx258
TTTTTTGCTGGAACATTTCTGGT
