# Supplementary material for: Potential Regulatory Role of MicroRNAs in the Development of Bovine Gastrointestinal Tract during Early Life
Source: PLoS One. 2014 Mar 28;9(3):e92592. doi: 10.1371/journal.pone.0092592 (PMC3969364; doi:10.1371/journal.pone.0092592)
Supplement: Table S2 — Temporally DE miRNAs list. All temporally DE miRNAs identified in different tissues were listed. (XLSX) [file pone.0092592.s003.xlsx]

## Sheet: RU_Temporal_DE
DE miRNAs identified in RU according to increasing ages
D7 vs D0					D21 vs D7					D42 vs D21
miRNA	logFC	logCPM	FDR	Regulation	miRNA	logFC	logCPM	FDR	Regulation	miRNA	logFC	logCPM	FDR	Regulation
bta-miR-122	-3.68096	2.13747	2.34e-09	Down	bta-miR-375	-4.57111	6.56254	5.69e-39	Down	bta-miR-486	2.21176	9.88673	1.6e-13	Up
bta-miR-gx111	-2.2865	2.34287	8.17e-05	Down	bta-miR-34c	-1.85714	3.5574	1.07e-05	Down
bta-miR-409a	-2.13389	5.06745	1.42e-10	Down	bta-miR-409a	-1.84125	3.36729	4.5e-05	Down
bta-miR-1271	-1.84851	5.12698	4.15e-08	Down	bta-miR-gx190	-1.58207	3.21244	0.00246076	Down
bta-miR-144	-1.77724	3.31743	3.72e-05	Down	bta-miR-486	-1.55265	9.43727	1.35e-07	Down
bta-miR-375	-1.72045	8.28244	5.57e-09	Down	bta-miR-96	-1.25534	3.05094	0.0318632	Down
bta-miR-150	-1.58489	5.75194	6.72e-06	Down	bta-miR-424-3p	-1.2389	3.00466	0.0214609	Down
bta-miR-96	-1.51774	4.27752	4.39e-06	Down	bta-miR-1247-5p	-1.0779	3.28765	0.0352797	Down
bta-miR-451	-1.44201	6.74747	1.44e-05	Down	bta-miR-125b	-0.909794	11.5319	0.00232166	Down
bta-miR-153	-1.421	2.27067	0.0209995	Down	bta-miR-125a	-0.829828	11.6081	0.0147246	Down
bta-miR-100	-1.35465	11.0358	1.07e-05	Down	bta-miR-181a	-0.800327	13.1162	0.0152235	Down
bta-miR-99b	-1.11636	11.2563	0.000511028	Down	bta-miR-181c	-0.753205	9.36016	0.0178883	Down
bta-miR-125a	-1.10169	12.333	0.00108208	Down	bta-miR-181b	-0.751397	8.87234	0.0352797	Down
bta-miR-338	-1.10026	6.46163	0.007093	Down	bta-miR-410	-0.74618	9.22286	0.0147246	Down
bta-miR-146b	-1.09164	6.91353	0.0465837	Down	bta-miR-100	-0.742117	10.157	0.0178883	Down
bta-miR-450a	-0.977764	6.61745	0.0212864	Down	bta-miR-665	-0.738667	6.12003	0.047084	Down
bta-miR-99a-5p	-0.926926	10.3721	0.00423735	Down	bta-miR-136	-0.727557	7.30198	0.0345506	Down
bta-miR-183	-0.856891	7.46392	0.0025795	Down	bta-miR-381	-0.693115	8.90691	0.0365168	Down
bta-miR-141	-0.660007	10.7558	0.0205511	Down	bta-miR-210	0.644332	7.73859	0.0352797	Up
bta-miR-221	1.01095	8.34851	0.012015	Up	bta-miR-15b	0.783605	6.41568	0.047084	Up
bta-miR-222	1.53153	7.97962	1.7e-05	Up	bta-miR-378	0.838178	13.5621	0.00665986	Up
bta-miR-gx107	1.56782	5.47938	0.000151933	Up	bta-miR-gx107	0.896736	6.52298	0.0100798	Up
bta-miR-27a-5p	1.5964	2.31241	0.0264833	Up	bta-miR-gx62	0.945564	4.11672	0.0214609	Up
bta-miR-147	1.67677	5.74411	1.07e-05	Up	bta-miR-378c	0.964511	6.86102	0.00246076	Up
bta-miR-21-5p	1.79661	13.302	9.33e-07	Up	bta-miR-147	0.973281	6.9254	0.000780802	Up
bta-miR-223	2.0781	4.14813	6.72e-06	Up	bta-miR-29b	1.02983	3.05521	0.0389967	Up
bta-miR-1246	2.12329	2.08304	0.0212864	Up	bta-miR-1246	1.04525	3.37154	0.0152479	Up
bta-miR-21-3p	2.60944	6.86205	5.98e-11	Up	bta-miR-454	1.08408	4.7606	0.00636801	Up
bta-miR-gx169	3.50404	3.17149	5.06e-08	Up	bta-miR-gx169	1.23863	4.75616	5.84e-05	Up
					bta-miR-193a-3p	1.47353	8.33497	3.56e-10	Up
					bta-miR-211	1.52904	4.18731	5.9e-07	Up
					bta-miR-31	1.57463	9.07376	2.85e-09	Up
					bta-miR-gx170	2.51895	3.80504	9.9e-12	Up

## Sheet: MJ_Temporal_DE
DE miRNAs identified in MJ according to increasing ages
D7 vs D0					D21 vs D7					D42 vs D21
miRNA	logFC	logCPM	FDR	Regulation	miRNA	logFC	logCPM	FDR	Regulation	miRNA	logFC	logCPM	FDR	Regulation
bta-miR-409a	-3.26101	2.46035	2.89e-14	Down	bta-miR-gx34	-1.06632	3.88159	0.0152006	Down	bta-miR-gx133	-3.19978	2.38553	2.24e-06	Down
bta-miR-96	-2.95409	2.72209	6.14e-13	Down	bta-miR-gx204	-0.916658	7.28618	0.013212	Down	bta-miR-211	-3.0318	5.77128	5.09e-15	Down
bta-miR-1271	-2.83713	3.58716	7.28e-17	Down	bta-miR-33b	-0.81944	5.18706	0.0230996	Down	bta-miR-gx129	-2.79827	4.09052	3.33e-10	Down
bta-miR-99a-5p	-2.40991	8.1503	1.21e-26	Down	bta-miR-215	-0.638798	16.2261	0.040174	Down	bta-miR-gx166	-2.61473	4.67403	4.18e-10	Down
bta-miR-100	-2.33221	9.107	2.56e-26	Down	bta-miR-146a	0.737973	9.0991	0.0348041	Up	bta-miR-gx165	-2.16786	3.706	3.79e-06	Down
bta-miR-99b	-2.16323	9.7576	6.46e-23	Down	bta-miR-211	0.76495	6.20907	0.0198129	Up	bta-miR-gx170	-2.08905	6.19912	2.26e-10	Down
bta-miR-204	-2.12311	7.5859	9.15e-20	Down	bta-miR-146b	1.22906	6.60682	5.27e-07	Up	bta-miR-gx140	-2.05761	2.15459	0.012161	Down
bta-miR-502b	-2.02474	3.22772	2.44e-09	Down	bta-miR-2332	1.27118	2.60648	0.0348041	Up	bta-miR-gx34	-1.91058	2.71611	0.00462757	Down
bta-miR-362-5p	-2.01375	2.77	4.62e-08	Down	bta-miR-1271	1.33431	3.08066	0.013685	Up	bta-miR-494	-1.36354	3.2222	0.0279129	Down
bta-miR-125a	-1.77968	10.7843	9.72e-16	Down	bta-miR-gx250	4.78812	3.6495	3.15e-26	Up	bta-miR-gx169	-1.29863	4.68881	0.0023649	Down
bta-miR-1343-3p	-1.68375	4.02417	4.55e-08	Down						bta-miR-138	-1.08762	6.5911	0.00279659	Down
bta-miR-153	-1.66269	3.94612	9.75e-08	Down						bta-miR-1388-3p	-0.997581	5.82076	0.0373832	Down
bta-miR-874	-1.64129	3.92545	9.52e-08	Down						bta-miR-378c	-0.947745	7.06447	0.0139947	Down
bta-miR-183	-1.61173	6.31418	9.14e-11	Down						bta-miR-gx107	-0.918137	6.64817	0.0361787	Down
bta-miR-125b	-1.58941	9.81976	6.14e-13	Down						bta-miR-146a	0.837521	9.89931	0.0398831	Up
bta-miR-339a	-1.53495	8.26258	1.12e-10	Down						bta-miR-99b	0.846207	9.87263	0.0365082	Up
bta-miR-146b	-1.49092	6.29134	3.15e-11	Down						bta-miR-486	0.920084	9.53041	0.0279129	Up
bta-miR-1388-5p	-1.43463	8.32933	2.36e-10	Down						bta-miR-24-3p	0.953925	8.9282	0.0138864	Up
bta-miR-500	-1.41583	2.66683	0.000610112	Down						bta-miR-99a-5p	0.98895	7.88395	0.012161	Up
bta-miR-188	-1.24629	2.20779	0.0122014	Down						bta-miR-379	1.04314	4.76863	0.026876	Up
bta-miR-10a	-1.22474	13.3415	2.38e-08	Down						bta-miR-191	1.11279	13.884	0.0023649	Up
bta-miR-361	-1.12909	7.07179	3.26e-06	Down						bta-miR-100	1.17173	8.90579	0.00115129	Up
bta-miR-486	-1.11519	9.66464	6.63e-07	Down						bta-miR-10a	1.25903	13.7663	0.000351739	Up
bta-miR-10b	-1.10976	13.7824	3.87e-07	Down						bta-miR-146b	1.27023	7.82523	0.00146989	Up
bta-miR-192	-1.07549	18.6127	6.83e-06	Down						bta-miR-362-5p	1.46518	2.78272	0.026876	Up
bta-miR-26b	-1.03732	11.3261	1.8e-05	Down						bta-miR-183	1.66385	7.21465	1.74e-06	Up
bta-miR-660	-1.03288	10.288	8.31e-06	Down						bta-miR-10b	1.79425	14.6693	7.55e-08	Up
bta-miR-223	-1.02823	5.99698	3.15e-05	Down						bta-miR-196a	5.04114	4.38244	3.78e-24	Up
bta-miR-215	-1.02086	16.6471	0.000101079	Down						bta-miR-196b	5.86562	6.10077	8.31e-43	Up
bta-miR-182	-0.969446	9.87547	0.000113205	Down
bta-miR-7	-0.966769	5.08676	0.000252486	Down
bta-miR-26a	-0.926814	14.198	0.000149256	Down
bta-miR-375	-0.922955	12.0452	0.000228173	Down
bta-miR-2285k	-0.911653	4.91126	0.00250099	Down
bta-miR-1468	-0.896135	9.84433	0.000113205	Down
bta-miR-744	-0.836935	5.03367	0.00388758	Down
bta-miR-211	-0.829623	5.84622	0.000748463	Down
bta-miR-19b	-0.826954	8.27634	0.000552479	Down
bta-miR-423-5p	-0.812174	9.04493	0.00217	Down
bta-miR-6524	-0.728091	5.82061	0.0169625	Down
bta-miR-185	-0.716007	4.0227	0.0500762	Down
bta-miR-151-5p	-0.694976	10.8271	0.00666951	Down
bta-miR-455-3p	-0.693331	4.6085	0.0276825	Down
bta-miR-374a	-0.682226	5.54893	0.0122014	Down
bta-miR-191	-0.640061	13.1103	0.00832068	Down
bta-miR-24-3p	-0.626429	8.07933	0.00635242	Down
bta-miR-532	-0.616422	8.21173	0.0186218	Down
bta-miR-142-3p	0.601654	7.61824	0.0442415	Up
bta-miR-17-5p	0.61351	6.81707	0.037479	Up
bta-miR-155	0.659241	6.87899	0.0294147	Up
bta-miR-2478	0.749851	4.7759	0.0365585	Up
bta-let-7i	0.805534	11.402	0.00300734	Up
bta-miR-147	0.81536	4.14551	0.0415862	Up
bta-miR-15a	0.822042	8.34221	0.00226246	Up
bta-miR-107	0.854812	7.92591	0.00170949	Up
bta-miR-424-5p	0.855478	5.39093	0.0098501	Up
bta-miR-301b	0.873253	5.09374	0.00747312	Up
bta-miR-103	0.893089	10.4643	0.000937483	Up
bta-miR-98	0.974427	9.18545	0.000220375	Up
bta-miR-22-5p	1.00539	3.80709	0.00666951	Up
bta-miR-326	1.01527	4.48917	0.00222878	Up
bta-miR-150	1.0196	7.40288	0.000149256	Up
bta-miR-429	1.02572	9.52488	0.000125454	Up
bta-miR-378c	1.02608	7.19759	0.000120473	Up
bta-miR-6123	1.04687	2.96825	0.0298435	Up
bta-miR-221	1.06465	8.1112	4.71e-05	Up
bta-miR-gx253	1.08198	4.64769	0.00243382	Up
bta-miR-494	1.22354	3.57859	0.00173212	Up
bta-miR-21-5p	1.22652	14.1478	2.76e-06	Up
bta-miR-2284aa	1.23535	3.02607	0.00587371	Up
bta-miR-1307	1.28571	6.77221	2.67e-06	Up
bta-miR-199c	1.38193	4.93094	4.64e-05	Up
bta-miR-27a-5p	1.40798	2.06173	0.0496966	Up
bta-miR-130b	1.416	8.17975	3.05e-08	Up
bta-miR-6120-3p	1.49894	3.83781	0.000312893	Up
bta-miR-193a-3p	1.52316	4.89589	1.36e-06	Up
bta-miR-138	1.64834	6.5182	4.96e-09	Up
bta-miR-33b	1.67616	4.90944	5.75e-07	Up
bta-miR-376b	1.70747	2.17304	0.0098501	Up
bta-miR-324	1.71886	3.3886	4.71e-05	Up
bta-miR-21-3p	1.75283	7.82166	8.21e-11	Up
bta-miR-18a	1.75935	5.4223	1.66e-08	Up
bta-miR-gx120	1.92405	7.89083	6.21e-12	Up
bta-miR-gx192	2.099	7.96166	2.15e-14	Up
bta-miR-106a	2.19663	2.73351	0.000113205	Up
bta-miR-2339	2.79112	2.02887	0.000188729	Up
bta-miR-gx107	2.96844	6.79891	2.87e-24	Up
bta-miR-gx204	3.18997	6.88106	8.94e-25	Up
bta-miR-gx34	3.77327	3.52717	1.79e-13	Up
bta-miR-gx133	5.28626	2.69873	5.33e-11	Up
bta-miR-gx166	5.60114	4.50099	2.56e-26	Up
bta-miR-gx169	6.2299	4.5294	2.15e-26	Up
bta-miR-gx130	8.0067	2.37083	2.36e-10	Up
bta-miR-gx170	9.20969	6.70134	2.13e-60	Up
bta-miR-gx165	9.45715	3.99441	5.21e-24	Up
bta-miR-gx129	9.90363	4.46064	4.55e-29	Up

## Sheet: IL_Temporal_DE
DE miRNAs identified in IL according to increasing ages
D7 vs D0					D21 vs D7					D42 vs D21
miRNA	logFC	logCPM	FDR	Regulation	miRNA	logFC	logCPM	FDR	Regulation	miRNA	logFC	logCPM	FDR	Regulation
bta-miR-409a	-4.47015	3.47541	4.54e-10	Down	bta-miR-378b	-4.72372	7.26915	1.09e-66	Down	bta-miR-211	-1.20776	4.96808	0.00155701	Down
bta-miR-205	-4.03453	3.07419	1.12e-07	Down	bta-miR-gx98	-1.66983	2.25488	0.0381482	Down	bta-miR-196b	-0.852259	7.77101	0.0073782	Down
bta-miR-483	-3.49683	2.28994	0.00016149	Down	bta-miR-451	-1.06114	6.58664	9.51e-05	Down
bta-miR-655	-2.22636	2.69858	0.00382239	Down	bta-miR-486	-1.00691	11.0075	2.24e-05	Down
bta-miR-375	-2.21837	11.7229	7.45e-09	Down	bta-miR-410	-0.797022	6.64237	0.0221731	Down
bta-miR-154b	-2.18005	2.52612	0.00611084	Down	bta-miR-gx120	-0.763409	7.02532	0.0358788	Down
bta-miR-196b	-2.173	8.8063	1.02e-08	Down	bta-miR-150	0.645711	8.85215	0.0329624	Up
bta-miR-145	-2.09759	10.145	2.93e-07	Down	bta-miR-29a	0.657859	8.70378	0.0317455	Up
bta-miR-495	-2.07735	2.99466	0.00382239	Down	bta-miR-145	0.688171	9.60698	0.0398658	Up
bta-miR-99a-3p	-1.95938	4.34821	0.000174024	Down	bta-let-7d	0.688926	8.1922	0.0329624	Up
bta-miR-423-5p	-1.88609	7.60252	1.53e-06	Down	bta-miR-214	0.866886	6.08547	0.0115271	Up
bta-miR-424-5p	-1.87121	5.59179	9.83e-05	Down	bta-miR-331	0.931752	5.86199	0.00818011	Up
bta-miR-382	-1.80716	3.09901	0.00874287	Down	bta-miR-423-5p	1.77856	7.93487	1.48e-15	Up
bta-miR-411c-3p	-1.76796	2.22795	0.0485223	Down	bta-miR-877	2.00242	3.12825	0.00119083	Up
bta-miR-149-5p	-1.76514	4.31825	0.00132731	Down
bta-miR-574	-1.74854	5.00944	0.000134162	Down
bta-miR-gx62	-1.7377	2.6199	0.0181709	Down
bta-miR-204	-1.64126	7.07238	0.000174024	Down
bta-miR-369-5p	-1.57553	3.62664	0.00644798	Down
bta-miR-133a	-1.51994	8.2083	0.00082737	Down
bta-miR-gx35	-1.49	5.68629	0.00209974	Down
bta-miR-127	-1.45947	12.7461	0.00065746	Down
bta-miR-1271	-1.45307	4.67666	0.00171337	Down
bta-miR-210	-1.41443	6.59223	0.00082737	Down
bta-miR-493	-1.40326	4.72916	0.00711316	Down
bta-miR-1343-3p	-1.37858	4.21161	0.0149894	Down
bta-miR-335	-1.36425	5.08088	0.00813462	Down
bta-miR-136	-1.35877	5.40315	0.00486677	Down
bta-miR-154c	-1.34286	5.83473	0.00392813	Down
bta-miR-125b	-1.30622	10.4543	0.00392813	Down
bta-let-7c	-1.30173	9.47219	0.00309281	Down
bta-miR-410	-1.28957	7.45237	0.00392813	Down
bta-miR-487b	-1.28852	4.48761	0.0219372	Down
bta-miR-153	-1.28039	4.50804	0.017444	Down
bta-miR-411c-5p	-1.24427	5.04801	0.0195603	Down
bta-miR-339a	-1.18161	7.45744	0.00523079	Down
bta-miR-411a	-1.17117	10.9317	0.00831589	Down
bta-miR-652	-1.11154	6.68053	0.00874587	Down
bta-miR-490	-1.10549	5.17624	0.0420844	Down
bta-miR-381	-1.1018	7.08361	0.0254368	Down
bta-miR-378	-1.08952	11.8583	0.00985346	Down
bta-miR-320a	-1.06109	8.47487	0.0176386	Down
bta-miR-532	-1.05394	7.86668	0.00392813	Down
bta-miR-125a	-1.00284	11.245	0.0339664	Down
bta-miR-196a	-0.997755	7.68918	0.0464219	Down
bta-miR-660	-0.989946	10.3561	0.00382239	Down
bta-miR-200b	-0.971287	6.94706	0.0255744	Down
bta-miR-99a-5p	-0.958945	9.05558	0.0450553	Down
bta-miR-1468	-0.932834	9.59632	0.0249157	Down
bta-miR-19b	-0.924125	8.43403	0.022695	Down
bta-miR-16a	1.06306	9.87696	0.032984	Up
bta-miR-16b	1.07559	11.2296	0.0331589	Up
bta-miR-15a	1.17068	8.43434	0.0127861	Up
bta-miR-425-5p	1.24348	8.7476	0.0191346	Up
bta-miR-17-5p	1.27757	7.10578	0.00874287	Up
bta-miR-18a	1.32093	5.61631	0.00874287	Up
bta-miR-211	1.32364	4.76083	0.00903225	Up
bta-miR-20a	1.32544	6.866	0.00665961	Up
bta-miR-gx120	1.40082	6.89478	0.000429624	Up
bta-miR-2285k	1.41157	7.14357	0.00711316	Up
bta-miR-21-5p	1.54607	14.5496	0.00171337	Up
bta-miR-155	1.58767	8.90058	0.00134536	Up
bta-miR-gx253	1.62542	5.06522	0.00427805	Up
bta-miR-223	1.65489	6.38961	0.00382239	Up
bta-miR-142-5p	1.65967	13.2952	0.000810023	Up
bta-miR-191	1.69424	14.8541	0.000924995	Up
bta-miR-6120-3p	1.72883	5.2415	0.00358886	Up
bta-miR-2478	1.74987	5.70824	0.000906977	Up
bta-miR-2285g	1.76336	3.59348	0.00874287	Up
bta-miR-92b	1.81428	9.91618	0.000411497	Up
bta-miR-gx67	1.82292	4.17407	0.0215866	Up
bta-miR-15b	1.8235	7.81521	0.000396853	Up
bta-miR-142-3p	1.89022	8.7617	0.000362312	Up
bta-miR-gx11	1.93957	4.17203	0.00711316	Up
bta-miR-gx1	1.9414	2.59945	0.00496988	Up
bta-miR-gx204	2.04095	4.63214	0.000116141	Up
bta-miR-gx6	2.14579	2.65932	0.038853	Up
bta-miR-20b	2.16498	5.09141	0.00134536	Up
bta-miR-146a	2.18091	11.0225	1.86e-05	Up
bta-miR-425-3p	2.1995	5.34535	0.000134162	Up
bta-miR-363	2.21769	6.74831	0.000134162	Up
bta-miR-gx170	2.22722	3.51956	0.0074391	Up
bta-miR-146b	2.25686	9.42059	1.44e-06	Up
bta-miR-2318	2.33059	3.43465	0.00510829	Up
bta-miR-21-3p	2.41089	8.74025	9.53e-07	Up
bta-miR-6523	2.51666	2.34376	0.0149171	Up
bta-miR-106a	2.56056	4.24346	0.00038756	Up
bta-miR-2376	2.56362	2.39978	0.00382239	Up
bta-miR-gx192	2.91995	2.14913	0.00903225	Up
bta-miR-2344	3.35678	2.17157	0.00704256	Up
bta-miR-378b	4.69502	7.60105	1.54e-20	Up
bta-miR-gx34	4.91146	2.27983	0.000174024	Up
