# Supplementary material for: Potential Regulatory Role of MicroRNAs in the Development of Bovine Gastrointestinal Tract during Early Life
Source: PLoS One. 2014 Mar 28;9(3):e92592. doi: 10.1371/journal.pone.0092592 (PMC3969364; doi:10.1371/journal.pone.0092592)
Supplement: Table S3 — Regionally DE miRNAs list. All Regionally DE miRNAs identified in different tissues were listed. (XLSX) [file pone.0092592.s004.xlsx]

## Sheet: RU VS IL
newborn	logFC	logCPM		week 1	logFC	logCPM		week 3	logFC	logCPM		week 6	logFC	logCPM
bta-miR-196a	-10.4609	7.2093		bta-miR-196a	-8.05872	6.18369		bta-miR-196a	-9.97527	6.63051		bta-miR-196a	-9.56182	6.10984
bta-miR-196b	-10.2096	8.84559		bta-miR-gx120	-7.89101	6.12574		bta-miR-196b	-9.0998	7.11754		bta-miR-gx120	-9.01819	5.56577
bta-miR-gx120	-7.01889	4.68677		bta-miR-gx204	-7.76144	3.77295		bta-miR-gx204	-8.87489	3.33247		bta-miR-196b	-8.72644	6.14673
bta-miR-215	-6.66763	13.0321		bta-miR-215	-7.5885	12.7137		bta-miR-gx120	-8.19257	5.63721		bta-miR-375	-8.20338	9.28772
bta-miR-192	-6.65425	16.6834		bta-miR-196b	-7.14544	6.58541		bta-miR-gx95	-8.14879	2.26195		bta-miR-gx95	-8.17819	2.39213
bta-miR-194	-6.38667	11.9221		bta-miR-192	-6.3683	16.1879		bta-miR-375	-7.83054	9.85865		bta-miR-215	-7.20051	13.0162
bta-miR-20b	-4.40395	2.36391		bta-miR-194	-6.09272	11.3831		bta-miR-215	-7.73934	13.12		bta-miR-gx204	-6.6996	3.16015
bta-miR-375	-3.88052	11.9067		bta-miR-20b	-5.46297	4.24125		bta-miR-192	-6.38742	16.1378		bta-miR-20b	-5.96666	4.93877
bta-miR-1388-5p	-3.12452	6.3584		bta-miR-106a	-5.06604	3.4214		bta-miR-194	-6.23562	11.6795		bta-miR-192	-5.90164	15.7277
bta-miR-142-3p	-2.83921	6.48742		bta-miR-142-5p	-4.61439	12.6584		bta-miR-106a	-6.0686	4.00459		bta-miR-194	-5.88467	11.1933
bta-miR-1388-3p	-2.82926	3.79036		bta-miR-378b	-4.54965	7.13296		bta-miR-gx191	-6.04759	2.22933		bta-miR-106a	-5.51829	4.20058
bta-miR-2285t	-2.75545	2.39443		bta-miR-1388-5p	-4.49213	7.13558		bta-miR-gx1	-5.83471	2.17899		bta-miR-363	-5.38875	6.27574
bta-miR-7	-2.69684	4.11316		bta-miR-142-3p	-4.40063	8.13134		bta-miR-gx251	-5.73785	2.26601		bta-miR-gx1	-5.37561	2.00453
bta-miR-223	-2.6826	4.32766		bta-miR-146a	-4.37016	10.451		bta-miR-20b	-4.97905	4.70079		bta-miR-146a	-4.49525	10.994
bta-miR-142-5p	-2.61035	11.219		bta-miR-363	-4.08926	6.10231		bta-miR-gx192	-4.74376	2.02515		bta-miR-gx251	-4.41325	2.28666
bta-miR-146a	-2.50004	8.54378		bta-miR-375	-3.76485	9.73303		bta-miR-146a	-4.48748	10.8571		bta-miR-142-5p	-4.23559	12.7705
bta-miR-21-3p	-1.95256	6.12122		bta-miR-gx11	-3.76394	3.35038		bta-miR-363	-4.25761	6.09476		bta-miR-142-3p	-4.22471	8.6578
bta-miR-gx253	-1.90637	3.11742		bta-miR-2318	-3.56726	2.6763		bta-miR-142-3p	-4.17292	8.66769		bta-miR-gx6	-3.95786	3.33895
bta-miR-211	-1.89925	3.08325		bta-miR-146b	-3.36694	8.95503		bta-miR-142-5p	-4.02733	12.6222		bta-miR-gx11	-3.85481	3.71982
bta-miR-10b	-1.82443	16.6811		bta-miR-191	-3.30236	14.2969		bta-miR-1388-5p	-3.82511	6.98526		bta-miR-18b	-3.79199	3.28007
bta-miR-153	-1.80699	4.40565		bta-miR-7	-3.26544	4.46443		bta-miR-150	-3.81898	8.32656		bta-miR-223	-3.74676	6.85047
bta-miR-744	-1.79296	4.48697		bta-miR-150	-3.24933	7.47956		bta-miR-191	-3.48731	14.6751		bta-miR-150	-3.62061	8.31802
bta-miR-6120-3p	-1.69959	3.28658		bta-miR-18b	-3.24705	2.03471		bta-miR-18b	-3.32299	3.45652		bta-miR-1388-5p	-3.50258	6.4263
bta-miR-29b	-1.64353	3.05566		bta-miR-425-3p	-3.23323	4.72138		bta-miR-gx11	-3.25969	3.00358		bta-miR-146b	-3.47526	8.83204
bta-miR-2285k	-1.57794	5.47856		bta-miR-1388-3p	-3.01963	4.28237		bta-miR-gx34	-3.23412	2.33721		bta-miR-191	-3.42437	14.5824
bta-miR-132	-1.55113	4.12414		bta-miR-gx253	-2.94842	4.39059		bta-miR-146b	-3.19392	8.62568		bta-miR-gx166	-3.35114	2.21124
bta-miR-21-5p	-1.43881	12.8248		bta-miR-2285k	-2.91517	6.53125		bta-miR-223	-3.02127	6.34992		bta-miR-155	-3.34059	8.51043
bta-miR-874	-1.4132	4.63899		bta-miR-874	-2.86071	5.20278		bta-miR-1388-3p	-2.97489	4.38929		bta-miR-1388-3p	-3.00325	4.26507
bta-miR-363	-1.41237	4.41859		bta-miR-2285g	-2.57415	2.97601		bta-miR-2285k	-2.90868	6.72192		bta-miR-874	-2.76742	5.8038
bta-miR-1249	-1.38133	3.6053		bta-miR-155	-2.4639	8.42812		bta-miR-2318	-2.87658	2.81927		bta-miR-2285k	-2.74639	6.63034
bta-miR-2285q	-1.30903	3.97556		bta-miR-2285t	-2.4506	2.44692		bta-miR-874	-2.73748	5.69324		bta-miR-2376	-2.57887	2.10369
bta-miR-147	-1.25462	5.31226		bta-miR-425-5p	-2.36117	8.22612		bta-miR-gx106	-2.73389	2.07747		bta-miR-7	-2.5613	4.26332
bta-miR-2419-5p	-1.23978	4.98288		bta-miR-211	-2.27923	4.23042		bta-miR-155	-2.7142	8.55413		bta-miR-425-3p	-2.54952	4.59009
bta-miR-130b	-1.22421	5.42837		bta-miR-29b	-2.23369	3.63436		bta-miR-425-3p	-2.60865	4.59531		bta-miR-2419-5p	-2.32574	5.36605
bta-miR-15b	-1.16391	5.89746		bta-miR-153	-2.23084	2.87325		bta-miR-gx6	-2.53459	2.56653		bta-miR-92b	-2.32407	9.40556
bta-miR-652	-1.15444	6.77691		bta-miR-15b	-2.22746	7.394		bta-miR-2285t	-2.44547	3.33305		bta-miR-504	-2.30093	4.65991
bta-miR-505	-1.15413	3.75464		bta-miR-gx170	-2.16073	3.04714		bta-miR-7	-2.39138	4.37543		bta-miR-425-5p	-2.12247	8.36271
bta-miR-301b	-1.15249	3.86118		bta-miR-301b	-2.09352	4.5848		bta-miR-504	-2.29529	4.96086		bta-miR-138	-2.10559	5.03359
bta-miR-425-5p	-1.15106	7.3329		bta-miR-6120-3p	-2.06912	4.78455		bta-miR-141	-2.14187	11.7977		bta-miR-gx158	-2.08588	2.39116
bta-miR-128	-1.10482	6.75795		bta-miR-92b	-2.03334	9.54048		bta-miR-425-5p	-2.08333	8.51314		bta-miR-gx253	-2.06845	4.54234
bta-miR-504	-1.10005	5.12947		bta-miR-223	-1.99328	5.94676		bta-miR-486	-2.04248	9.82922		bta-miR-29a	-2.01135	8.61032
bta-miR-150	-1.07045	7.47248		bta-miR-10b	-1.96081	16.3817		bta-miR-gx158	-1.9888	2.5487		bta-miR-2285t	-1.99167	3.83197
bta-miR-191	-1.06253	13.1008		bta-miR-141	-1.9108	11.4829		bta-miR-92b	-1.95779	9.39881		bta-miR-2318	-1.84741	2.58896
bta-miR-155	-1.05656	7.2179		bta-miR-2285q	-1.83854	4.37899		bta-miR-2419-5p	-1.91034	5.38886		bta-miR-6522	-1.79157	2.43752
bta-miR-574	-0.958278	5.38532		bta-miR-2419-5p	-1.72099	4.88731		bta-miR-129	-1.79772	2.1086		bta-miR-141	-1.76931	11.6521
bta-miR-222	-0.950713	7.30024		bta-miR-144	-1.65224	3.34335		bta-miR-129-5p	-1.79772	2.1086		bta-miR-338	-1.76522	6.30517
bta-miR-29a	-0.873438	7.38093		bta-miR-21-3p	-1.63153	8.51156		bta-miR-138	-1.79187	4.78685		bta-miR-2285g	-1.74852	3.32997
bta-miR-199a-5p	0.875613	9.80594		bta-miR-gx34	-1.63038	2.26368		bta-miR-10b	-1.76286	16.1174		bta-miR-132	-1.66985	5.34993
bta-miR-26a	0.889558	15.2769		bta-miR-29a	-1.61666	7.61798		bta-miR-29a	-1.7402	8.46883		bta-miR-21-3p	-1.63379	8.87841
bta-miR-708	0.913548	5.37783		bta-miR-16b	-1.59859	10.8572		bta-miR-2285g	-1.73619	3.41316		bta-miR-gx91	-1.61869	3.98405
bta-miR-99b	0.914241	11.5178		bta-miR-486	-1.59756	10.8093		bta-miR-gx253	-1.67031	4.58649		bta-miR-130b	-1.59459	6.58924
bta-miR-214	0.927379	6.7173		bta-miR-15a	-1.5947	8.08026		bta-miR-153	-1.65907	3.01815		bta-miR-6120-3p	-1.58233	5.16702
bta-miR-143	0.968303	18.5986		bta-miR-18a	-1.58501	5.26456		bta-miR-132	-1.64701	5.41668		bta-miR-10b	-1.57682	15.7344
bta-miR-23b-3p	0.975967	10.3157		bta-miR-16a	-1.58268	9.50578		bta-miR-338	-1.56084	6.72852		bta-miR-1271	-1.57017	4.6883
bta-miR-3431	0.980626	5.27117		bta-miR-2336	-1.5251	4.66098		bta-miR-130b	-1.4938	6.47321		bta-miR-15b	-1.44998	7.68226
bta-miR-199b	0.996467	9.84738		bta-miR-1246	-1.50146	3.37618		bta-miR-6120-3p	-1.47591	5.33111		bta-miR-129	-1.44975	2.01001
bta-miR-152	1.04371	7.1605		bta-miR-132	-1.44219	4.60077		bta-miR-21-3p	-1.46337	8.77766		bta-miR-129-5p	-1.44975	2.01001
bta-miR-27b	1.05533	15.1584		bta-miR-130b	-1.43436	5.9271		bta-miR-3613	-1.42683	2.34332		bta-miR-181b	-1.40783	9.15941
bta-miR-23a	1.06264	9.00971		bta-miR-gx91	-1.41205	3.31232		bta-miR-15b	-1.42407	7.70472		bta-miR-153	-1.34887	2.10033
bta-miR-331	1.08596	6.57209		bta-miR-504	-1.26401	4.69558		bta-miR-181b	-1.37776	9.34223		bta-miR-17-3p	-1.34831	4.86625
bta-miR-127	1.09453	14.0693		bta-miR-17-5p	-1.19961	6.87372		bta-miR-181a	-1.37617	13.5456		bta-miR-2285q	-1.30934	4.30352
bta-let-7c	1.09848	10.7318		bta-miR-2478	-1.15982	5.54749		bta-miR-17-3p	-1.33329	4.86324		bta-miR-181a	-1.30864	13.4357
bta-miR-432	1.12806	6.48751		bta-miR-25	-1.13564	11.61		bta-miR-744	-1.29511	4.95876		bta-miR-128	-1.29945	7.48694
bta-miR-145	1.13949	11.3495		bta-miR-gx67	-1.12444	3.99547		bta-miR-144	-1.29101	2.98906		bta-miR-18a	-1.28475	5.81209
bta-miR-99a-3p	1.14183	5.81131		bta-miR-20a	-1.06925	6.68471		bta-miR-15a	-1.29031	8.3402		bta-miR-25	-1.26635	11.667
bta-miR-655	1.15462	4.06457		bta-miR-21-5p	-1.05284	14.4052		bta-miR-301b	-1.2502	4.82523		bta-miR-29b	-1.26151	4.31066
bta-miR-376e	1.18398	3.54794		bta-miR-32	-1.04689	7.08586		bta-miR-128	-1.24142	7.44667		bta-miR-2478	-1.23427	5.87525
bta-miR-130a	1.20364	9.8462		bta-miR-6119-3p	-1.02135	3.1333		bta-miR-6524	-1.20319	4.70991		bta-miR-15a	-1.21467	8.36608
bta-miR-27a-3p	1.21147	10.2066		bta-miR-1307	-0.9978	6.01831		bta-miR-18a	-1.18135	5.91529		bta-miR-92a	-1.15222	13.3615
bta-miR-154b	1.21894	3.86344		bta-miR-744	-0.950887	4.06991		bta-miR-gx91	-1.17682	3.71975		bta-miR-2284z	-1.12438	5.14378
bta-miR-483	1.22682	3.93718		bta-miR-106b	-0.95034	7.33002		bta-miR-16a	-1.17414	9.76885		bta-miR-2336	-1.11958	4.7048
bta-miR-450a	1.23479	6.68441		bta-miR-138	-0.941637	4.02443		bta-miR-574	-1.1741	4.53752		bta-miR-16a	-1.09689	9.65965
bta-miR-424-5p	1.26521	7.17334		bta-miR-454	-0.938775	4.51985		bta-miR-25	-1.16467	11.6553		bta-miR-17-5p	-1.05345	7.06525
bta-miR-450b	1.27724	8.04429		bta-miR-93	-0.93735	9.72359		bta-miR-29b	-1.16113	4.26078		bta-miR-455-5p	-1.04174	5.65429
bta-miR-125a	1.29216	12.478		bta-miR-128	-0.893	6.94608		bta-miR-16b	-1.15325	11.1687		bta-miR-16b	-1.04003	11.1091
bta-miR-1185	1.33011	3.18834		bta-miR-181a	-0.791263	13.866		bta-miR-2478	-1.04287	5.81302		bta-miR-29c	-1.03002	6.48051
bta-miR-369-5p	1.3389	5.09147		bta-miR-6119-5p	-0.790391	9.66737		bta-miR-2285q	-1.02036	4.54559		bta-miR-744	-1.02194	4.58106
bta-miR-96	1.3459	4.55285		bta-miR-29c	-0.772601	6.08614		bta-miR-361	-0.987298	7.20966		bta-miR-361	-0.997564	7.14257
bta-miR-gx35	1.34718	7.13203		bta-miR-451	-0.744005	6.60226		bta-miR-10a	-0.97857	15.9781		bta-miR-574	-0.900357	4.55548
bta-miR-411c-5p	1.38195	6.40867		bta-miR-181b	-0.731904	9.55097		bta-miR-2336	-0.974104	4.83314		bta-miR-106b	-0.889186	7.40663
bta-miR-154c	1.41521	7.31204		bta-miR-126-5p	-0.65212	12.8772		bta-miR-29c	-0.967903	6.386		bta-miR-1260b	-0.887316	5.47269
bta-miR-490	1.42199	6.39971		bta-miR-200a	-0.645432	9.0098		bta-miR-2284z	-0.928409	5.11707		bta-miR-148a	-0.873686	14.1973
bta-miR-299	1.42638	3.37368		bta-miR-361	-0.609952	7.15689		bta-miR-374a	-0.918006	6.30564		bta-miR-484	-0.861183	7.60738
bta-miR-99a-5p	1.44533	10.4042		bta-miR-2285f	-0.608799	5.90486		bta-miR-1271	-0.890905	4.54072		bta-miR-6119-5p	-0.858056	10.044
bta-miR-376b	1.44734	3.87821		bta-miR-27b	0.62837	15.0922		bta-miR-106b	-0.872893	7.44615		bta-miR-301b	-0.847123	4.89327
bta-miR-gx111	1.48227	2.81239		bta-miR-378c	0.643993	5.94234		bta-miR-2285f	-0.835365	6.24459		bta-miR-6524	-0.835912	4.21052
bta-miR-30a-5p	1.50242	13.4122		bta-miR-660	0.689533	10.2063		bta-miR-92a	-0.797536	13.3591		bta-miR-374a	-0.822916	6.1386
bta-miR-125b	1.51579	11.953		bta-miR-19b	0.720051	8.41385		bta-miR-32	-0.769106	7.11035		bta-miR-455-3p	-0.817757	4.70948
bta-miR-665	1.52286	5.77481		bta-miR-107	0.726569	7.9487		bta-miR-6119-5p	-0.749955	10.148		bta-miR-186	-0.802246	12.5573
bta-miR-224	1.52599	5.41028		bta-miR-339b	0.772534	5.77102		bta-miR-151-5p	-0.71924	11.3913		bta-miR-342	-0.795438	8.57686
bta-miR-335	1.54259	6.60375		bta-miR-147	0.793851	5.91721		bta-miR-183	-0.711508	7.29642		bta-miR-652	-0.752679	6.31082
bta-miR-100	1.56356	11.2347		bta-miR-27a-3p	0.813607	10.5505		bta-miR-93	-0.709239	9.9813		bta-miR-148b	-0.738034	9.53692
bta-miR-149-5p	1.56464	5.98435		bta-miR-339a	0.816227	7.38973		bta-miR-186	-0.704535	12.665		bta-miR-32	-0.690621	6.84782
bta-miR-409a	1.56809	5.54056		bta-let-7f	0.857837	13.3896		bta-miR-148b	-0.700629	9.64368		bta-miR-9-5p	-0.685803	6.85598
bta-miR-487b	1.57091	5.98978		bta-miR-100	0.87581	10.0448		bta-miR-342	-0.664799	8.61365		bta-miR-151-5p	-0.68255	11.2831
bta-miR-136	1.62627	6.98829		bta-miR-126-3p	0.879847	10.3932		bta-miR-17-5p	-0.661788	7.16875		bta-miR-2285f	-0.677727	6.22952
bta-miR-380-3p	1.62928	7.36355		bta-miR-199c	0.899093	5.61672		bta-miR-455-5p	-0.658526	5.7477		bta-miR-93	-0.646698	9.87824
bta-miR-365-3p	1.63186	5.87809		bta-miR-gx107	0.938513	5.58525		bta-miR-126-5p	-0.62052	13.1555		bta-miR-497	0.608788	7.9487
bta-miR-493	1.63334	6.34898		bta-let-7i	0.967067	12.2278		bta-miR-28	-0.601175	9.58111		bta-miR-125b	0.623796	10.5396
bta-miR-193b	1.64163	7.29971		bta-miR-125a	0.975695	11.4786		bta-miR-152	0.617422	6.82006		bta-miR-26a	0.673401	14.7413
bta-miR-34c	1.66496	3.36983		bta-miR-1343-3p	0.976412	4.15809		bta-miR-339b	0.646126	5.58007		bta-miR-152	0.674706	6.55634
bta-miR-410	1.67033	9.08108		bta-miR-450b	0.999015	7.55926		bta-miR-301a	0.680295	9.15844		bta-miR-30b-5p	0.680947	9.45765
bta-miR-1247-5p	1.70068	3.5519		bta-miR-98	1.06059	9.95176		bta-miR-218	0.687023	6.22713		bta-miR-660	0.693445	10.143
bta-miR-381	1.7753	8.65487		bta-let-7d	1.07786	8.35166		bta-miR-133a	0.716041	8.78029		bta-miR-182	0.696775	9.77731
bta-miR-122	1.77695	2.78417		bta-miR-22-5p	1.08277	3.04345		bta-miR-125b	0.727181	10.6686		bta-miR-107	0.709621	7.89196
bta-miR-369-3p	1.86313	6.78142		bta-miR-23a	1.08333	9.04175		bta-miR-1468	0.762128	9.59344		bta-miR-218	0.721748	5.92985
bta-miR-411a	1.86433	12.6651		bta-let-7a-5p	1.08784	13.1253		bta-miR-660	0.778877	10.2993		bta-miR-532	0.735926	8.11168
bta-miR-30f	1.86493	7.37066		bta-let-7a-3p	1.13465	5.18132		bta-miR-199b	0.781017	9.72306		bta-miR-1468	0.761295	9.37746
bta-miR-485	1.94325	2.57532		bta-miR-450a	1.13827	5.89712		bta-miR-450b	0.827702	7.42213		bta-miR-126-3p	0.794754	10.3842
bta-miR-494	2.25646	4.47619		bta-miR-26a	1.15586	14.9614		bta-miR-1343-3p	0.828323	4.31767		bta-let-7a-3p	0.803311	5.51083
bta-miR-204	2.59446	9.55059		bta-miR-101	1.19622	10.8983		bta-let-7b	0.860318	10.6018		bta-miR-1343-3p	0.830123	4.24713
bta-miR-193a-3p	2.66198	6.15457		bta-miR-99a-5p	1.28031	9.49085		bta-miR-27b	0.872692	15.0939		bta-miR-130a	0.83634	8.96277
bta-miR-31	5.09802	6.70871		bta-miR-143	1.28649	18.7066		bta-let-7a-5p	0.876451	13.1944		bta-let-7b	0.882073	10.5915
bta-miR-205	8.87545	11.8521		bta-miR-1468	1.28762	9.98066		bta-miR-107	0.878365	8.08071		bta-miR-424-5p	0.913574	5.82028
				bta-let-7b	1.31786	10.5105		bta-miR-450a	0.892975	5.785		bta-miR-2299-5p	0.924576	3.75714
				bta-miR-gx169	1.33288	3.41975		bta-miR-3432	0.895214	3.85424		bta-miR-301a	0.962359	9.04542
				bta-let-7e	1.34582	9.02686		bta-miR-126-3p	0.906772	10.7641		bta-miR-33a	0.97307	4.02262
				bta-miR-328	1.36188	3.63726		bta-miR-gx170	0.938346	4.33472		bta-miR-101	1.00954	10.5463
				bta-miR-767	1.37855	3.68942		bta-miR-101	1.08372	10.7981		bta-miR-22-5p	1.04448	3.81147
				bta-miR-210	1.38022	6.76804		bta-let-7a-3p	1.10222	5.50315		bta-miR-320a	1.04767	9.39292
				bta-miR-532	1.41688	8.18862		bta-miR-27a-3p	1.14659	10.8132		bta-miR-27b	1.06852	14.9913
				bta-miR-199a-5p	1.44219	9.65353		bta-miR-532	1.25232	8.31207		bta-miR-27a-3p	1.07109	10.62
				bta-miR-214	1.44389	6.40726		bta-miR-320a	1.27422	9.38111		bta-miR-1	1.13123	3.62645
				bta-miR-218	1.45074	6.30625		bta-miR-487a	1.27879	2.52314		bta-miR-1306	1.14449	3.59689
				bta-miR-130a	1.45177	9.32882		bta-miR-30a-5p	1.28886	13.0153		bta-miR-382	1.23611	2.88517
				bta-miR-376e	1.45775	3.63127		bta-miR-188	1.29896	2.60985		bta-miR-147	1.2386	6.64377
				bta-miR-23b-3p	1.46438	10.3123		bta-miR-127	1.38022	13.5704		bta-miR-654	1.32379	2.55504
				bta-miR-199a-3p	1.48029	11.8515		bta-miR-23b-3p	1.38378	10.3436		bta-miR-143	1.37157	18.9983
				bta-miR-542-5p	1.49964	3.17857		bta-miR-23a	1.46322	9.33832		bta-miR-376b	1.37295	2.54802
				bta-miR-30a-5p	1.49986	13.2169		bta-miR-542-5p	1.48773	3.18036		bta-miR-23a	1.44982	9.25805
				bta-miR-24	1.50048	2.21138		bta-miR-411c-3p	1.49084	2.54141		bta-miR-224	1.46371	5.56971
				bta-miR-424-3p	1.51807	3.03634		bta-miR-331	1.51491	7.31775		bta-miR-542-5p	1.48136	2.64014
				bta-miR-378	1.56069	12.4011		bta-miR-33a	1.53554	4.01028		bta-miR-30a-5p	1.48825	12.9517
				bta-miR-452	1.59876	3.55111		bta-miR-452	1.53999	3.40608		bta-miR-487a	1.49153	2.16242
				bta-miR-877	1.60811	2.9026		bta-miR-378c	1.54338	6.8045		bta-miR-2904	1.51036	2.49256
				bta-miR-365-3p	1.6289	5.97815		bta-miR-490	1.59252	6.6821		bta-miR-188	1.52466	2.48612
				bta-miR-2285e	1.64206	2.77564		bta-miR-369-5p	1.61444	4.66128		bta-miR-127	1.52982	13.3824
				bta-miR-654	1.73092	3.3128		bta-miR-30f	1.63856	6.94511		bta-miR-24	1.57247	2.69615
				bta-miR-199b	1.75283	9.80463		bta-miR-147	1.66837	6.86499		bta-miR-2285e	1.57297	2.43756
				bta-miR-193a-5p	1.80577	2.63836		bta-miR-376b	1.66984	3.30934		bta-miR-23b-3p	1.58689	10.2553
				bta-miR-152	1.80839	6.96978		bta-miR-376e	1.67731	3.18927		bta-miR-378c	1.59227	6.84121
				bta-miR-133a	1.89117	8.80959		bta-miR-424-5p	1.68114	6.33314		bta-miR-299	1.64734	2.65457
				bta-miR-320a	1.89811	9.26231		bta-miR-3431	1.71637	5.57415		bta-let-7c	1.65321	10.2079
				bta-miR-3431	1.9023	5.75811		bta-miR-224	1.72684	5.80548		bta-miR-411c-5p	1.66828	5.7223
				bta-miR-487a	1.92289	2.90482		bta-miR-654	1.76262	3.34955		bta-miR-133a	1.67877	9.03685
				bta-miR-193b	1.93859	7.35244		bta-miR-487b	1.81216	5.30781		bta-miR-gx107	1.70572	6.6402
				bta-miR-gx62	1.96483	3.03114		bta-miR-gx107	1.87175	6.35402		bta-miR-487b	1.70883	4.85918
				bta-miR-125b	1.97732	11.2235		bta-miR-485	1.87526	2.05198		bta-miR-1185	1.72447	2.87142
				bta-miR-432	2.07744	6.85535		bta-miR-27a-5p	1.88413	2.83962		bta-miR-335	1.80325	5.53724
				bta-miR-382	2.0785	3.59672		bta-miR-365-3p	1.89354	6.58584		bta-miR-30f	1.82798	7.03244
				bta-miR-370	2.08218	2.94341		bta-let-7c	1.90435	10.4265		bta-miR-3431	1.84074	5.17061
				bta-miR-423-5p	2.10875	8.11215		bta-miR-299	1.94508	3.13989		bta-miR-665	1.84521	4.47127
				bta-miR-133b	2.11394	2.02914		bta-miR-193a-5p	1.97248	2.92756		bta-miR-331	1.84592	7.30169
				bta-miR-1185	2.14913	3.47618		bta-miR-411c-5p	1.98158	6.16946		bta-miR-365-3p	1.85899	6.64676
				bta-miR-30f	2.18247	7.10584		bta-miR-382	1.9999	3.35171		bta-miR-452	1.88155	2.90939
				bta-miR-411c-3p	2.23461	2.8368		bta-miR-381	2.0097	7.86542		bta-miR-210	1.93308	7.01266
				bta-miR-331	2.24257	6.79621		bta-miR-411a	2.02352	11.8442		bta-miR-376e	1.95105	2.53205
				bta-miR-380-3p	2.24649	7.09068		bta-miR-495	2.0272	3.88662		bta-miR-149-5p	1.98872	5.37548
				bta-miR-127	2.35751	13.702		bta-miR-380-3p	2.04844	6.68496		bta-miR-2487	2.01446	2.03417
				bta-miR-665	2.38253	5.75374		bta-miR-145	2.05097	11.3779		bta-miR-495	2.05733	2.95134
				bta-miR-154c	2.40393	6.88541		bta-miR-335	2.06587	5.98444		bta-miR-380-3p	2.09306	6.39322
				bta-miR-149-5p	2.52182	5.2401		bta-miR-149-5p	2.09018	5.20157		bta-miR-193b	2.09874	8.11048
				bta-miR-381	2.53736	8.43826		bta-miR-432	2.11579	6.42865		bta-miR-381	2.10499	7.47531
				bta-miR-369-3p	2.55351	6.50704		bta-miR-gx62	2.15986	3.98789		bta-miR-136	2.15385	5.71153
				bta-miR-487b	2.57041	5.73117		bta-miR-193b	2.17308	8.03871		bta-miR-411a	2.26742	11.516
				bta-miR-376b	2.57759	3.67446		bta-miR-655	2.19256	3.83574		bta-miR-378	2.32258	13.2932
				bta-miR-411a	2.5935	12.2498		bta-miR-378	2.19995	13.2944		bta-miR-410	2.34337	7.49289
				bta-miR-411c-5p	2.60155	6.3633		bta-miR-210	2.2064	7.42322		bta-miR-193a-5p	2.34887	3.15714
				bta-miR-224	2.6145	5.70513		bta-miR-154b	2.22865	3.74606		bta-miR-432	2.42561	5.89136
				bta-let-7c	2.62227	10.771		bta-miR-154c	2.27915	6.60533		bta-miR-gx169	2.44973	4.87834
				bta-miR-410	2.64881	8.7731		bta-miR-136	2.28674	6.20035		bta-miR-490	2.45147	6.88226
				bta-miR-145	2.67402	10.9884		bta-miR-99a-3p	2.29724	5.28379		bta-miR-154c	2.47608	6.17372
				bta-miR-335	2.68902	6.33633		bta-miR-1185	2.31517	3.19673		bta-miR-493	2.51461	5.13721
				bta-miR-490	2.69985	6.65363		bta-miR-410	2.44778	8.03309		bta-miR-369-5p	2.56488	3.86174
				bta-miR-369-5p	2.75457	4.82866		bta-miR-369-3p	2.51546	6.19404		bta-miR-655	2.58027	3.57867
				bta-miR-424-5p	2.77219	6.65225		bta-miR-gx35	2.60074	6.7961		bta-miR-gx35	2.62492	6.05633
				bta-miR-gx35	2.81053	7.05481		bta-miR-665	2.60687	5.02329		bta-miR-369-3p	2.68212	5.62523
				bta-miR-136	2.86622	6.83346		bta-miR-gx169	2.62094	4.64821		bta-miR-99a-3p	2.71542	4.89749
				bta-miR-1247-5p	2.92568	3.10287		bta-miR-1247-5p	2.66279	2.02171		bta-miR-154b	2.85859	3.50452
				bta-miR-495	2.96799	4.06239		bta-miR-493	2.66281	5.826		bta-miR-494	2.86249	3.70872
				bta-miR-494	3.00102	4.06762		bta-miR-494	2.81335	3.97008		bta-miR-543	2.95171	2.18374
				bta-miR-543	3.01673	2.90885		bta-miR-433	2.81684	2.17621		bta-miR-gx62	2.98887	3.92711
				bta-miR-99a-3p	3.02488	5.54033		bta-miR-543	2.93642	2.47162		bta-miR-145	3.02107	11.9258
				bta-miR-193a-3p	3.07347	6.32782		bta-miR-483	3.95135	3.50187		bta-miR-483	3.04573	3.15112
				bta-miR-493	3.07405	6.33383		bta-miR-204	3.9865	9.40712		bta-miR-204	4.15299	9.4397
				bta-miR-655	3.21249	3.89609		bta-miR-193a-3p	4.66152	8.11319		bta-miR-193a-3p	5.39932	8.2316
				bta-miR-299	3.46891	3.56901		bta-miR-31	6.64659	8.79706		bta-miR-31	6.97753	8.66141
				bta-miR-154b	3.47352	3.98158		bta-miR-205	13.2479	12.2614		bta-miR-gx164	7.39899	2.02711
				bta-miR-433	3.53935	2.20804						bta-miR-205	15.0886	12.0554
				bta-miR-409a	3.71055	3.31076
				bta-miR-204	3.74395	9.16154
				bta-miR-485	3.79543	2.4386
				bta-miR-34c	4.35208	3.47561
				bta-miR-483	5.06034	4.12227
				bta-miR-31	5.19601	7.02694
				bta-miR-205	12.6633	11.8538

## Sheet: RU VS MJ
	logFC	logCPM			logFC	logCPM			logFC	logCPM			logFC	logCPM
bta-miR-215	-11.9961	16.1104		bta-miR-gx192	-13.8222	7.63041		bta-miR-gx204	-11.8241	5.97071		bta-miR-gx192	-12.8735	7.21149
bta-miR-211	-11.1347	5.30952		bta-miR-215	-10.6175	15.4998		bta-miR-gx192	-10.488	7.91735		bta-miR-gx120	-11.1603	7.55438
bta-miR-gx192	-11.0376	5.20205		bta-miR-gx204	-10.4489	6.63182		bta-miR-gx120	-9.87016	7.35002		bta-miR-375	-10.3821	11.3725
bta-miR-194	-8.83731	13.8456		bta-miR-gx120	-9.28804	7.5357		bta-miR-215	-9.57794	14.9812		bta-miR-gx204	-9.19979	5.59789
bta-miR-192	-8.3362	18.1483		bta-miR-gx133	-8.76302	2.5074		bta-miR-375	-9.34732	11.29		bta-miR-215	-8.77254	14.4605
bta-miR-196a	-8.13511	2.06194		bta-miR-194	-8.68858	13.7476		bta-miR-gx250	-8.84745	3.82175		bta-miR-196b	-8.29633	5.92524
bta-miR-gx12	-8.06824	1.42715		bta-miR-192	-7.81568	17.4126		bta-miR-gx133	-8.13161	2.28017		bta-miR-194	-7.58669	12.7362
bta-miR-216b	-6.853	1.82876		bta-miR-gx130	-7.20569	2.21205		bta-miR-194	-8.00558	13.4287		bta-miR-gx250	-7.50036	3.20365
bta-miR-885	-6.853	0.973906		bta-miR-gx166	-6.2991	4.32272		bta-miR-192	-7.50852	17.2536		bta-miR-196a	-7.4673	4.21631
bta-miR-gx120	-6.28783	5.30272		bta-miR-gx129	-5.47948	4.30846		bta-miR-gx166	-5.08202	4.60487		bta-miR-192	-7.10317	16.7394
bta-miR-1388-5p	-5.47024	8.06836		bta-miR-375	-5.30299	10.9842		bta-miR-1388-3p	-4.07253	5.47607		bta-miR-1388-5p	-3.66338	6.42688
bta-miR-223	-5.1427	5.57592		bta-miR-gx170	-5.29301	6.54105		bta-miR-106a	-3.92273	2.24442		bta-miR-106a	-3.47585	2.02168
bta-miR-1388-3p	-4.71468	5.26229		bta-miR-gx165	-4.98915	3.86248		bta-miR-1388-5p	-3.90596	7.11436		bta-miR-153	-3.11206	3.4464
bta-miR-7	-4.62181	4.67348		bta-miR-1388-5p	-4.39593	6.96871		bta-miR-gx129	-3.57336	4.08217		bta-miR-1388-3p	-3.01505	4.17703
bta-miR-gx204	-4.23916	3.05227		bta-miR-1388-3p	-4.21611	5.54706		bta-miR-138	-3.51707	6.34482		bta-miR-7	-2.91266	4.36715
bta-miR-132	-3.73633	4.97952		bta-miR-106a	-3.79644	2.51569		bta-miR-gx140	-3.50538	2.02933		bta-miR-142-5p	-2.89908	11.4554
bta-miR-142-5p	-3.30711	10.9647		bta-miR-130b	-3.78093	7.87217		bta-miR-142-5p	-3.15212	11.8147		bta-miR-150	-2.81829	7.46976
bta-miR-375	-3.26696	11.5931		bta-miR-138	-3.74585	6.24907		bta-miR-gx34	-3.09751	2.63422		bta-miR-146a	-2.73901	9.32711
bta-miR-142-3p	-3.25794	6.24576		bta-miR-142-3p	-3.45558	7.16354		bta-miR-150	-3.0923	7.68992		bta-miR-223	-2.73173	5.86212
bta-miR-2419-5p	-3.00523	5.084		bta-miR-142-5p	-3.40072	11.3785		bta-miR-130b	-2.93016	7.64468		bta-miR-142-3p	-2.64502	7.11094
bta-miR-130b	-2.86994	6.16552		bta-miR-132	-2.97402	5.8904		bta-miR-142-3p	-2.92785	7.5796		bta-miR-363	-2.53749	3.45954
bta-miR-423-5p	-2.63765	9.00794		bta-miR-150	-2.97322	7.0977		bta-miR-132	-2.73025	6.36062		bta-miR-132	-2.36189	5.72077
bta-miR-574	-2.34631	5.69836		bta-miR-211	-2.94333	4.92711		bta-miR-2419-5p	-2.36151	5.82745		bta-miR-130b	-2.32172	7.15279
bta-miR-744	-2.28786	4.66327		bta-miR-gx34	-2.92268	3.48		bta-miR-574	-2.30472	5.47859		bta-miR-191	-2.19318	13.4812
bta-miR-138	-2.06477	4.38462		bta-miR-7	-2.77927	4.13562		bta-miR-153	-2.24599	3.54224		bta-miR-574	-2.04141	5.12332
bta-miR-128	-1.96951	6.74935		bta-miR-gx253	-2.77116	4.36866		bta-miR-146a	-2.21609	8.83596		bta-miR-2419-5p	-2.03702	5.03757
bta-miR-153	-1.96485	4.00608		bta-miR-33b	-2.44655	4.76566		bta-miR-7	-2.11809	4.21345		bta-miR-138	-2.02974	4.99909
bta-miR-425-5p	-1.70967	7.34086		bta-miR-301b	-2.35991	4.84343		bta-miR-223	-2.11558	5.54165		bta-miR-146b	-1.99271	7.46931
bta-miR-146a	-1.64781	7.60643		bta-miR-141	-2.35101	11.7278		bta-miR-141	-2.04143	11.7812		bta-miR-155	-1.85364	7.127
bta-miR-29a	-1.60551	7.18829		bta-miR-200c	-2.06481	8.89213		bta-miR-gx170	-1.98842	6.32254		bta-miR-gx253	-1.8346	4.22253
bta-miR-30a-5p	1.54096	13.2006		bta-miR-144	-2.06284	3.72134		bta-miR-6524	-1.93181	5.35171		bta-miR-6524	-1.76397	4.7072
bta-let-7b	1.54753	9.86762		bta-miR-425-5p	-1.98231	7.82543		bta-miR-211	-1.84637	6.09967		bta-miR-504	-1.65259	3.97952
bta-miR-27a-3p	1.5513	9.86149		bta-miR-1307	-1.96345	6.66285		bta-miR-20b	-1.7737	2.09885		bta-miR-425-3p	-1.62304	3.70736
bta-miR-23b-3p	1.57967	9.85299		bta-miR-2419-5p	-1.94189	5.07982		bta-miR-gx149	-1.67236	2.2185		bta-miR-141	-1.58775	11.4008
bta-miR-100	1.63014	10.9594		bta-miR-153	-1.91988	2.78559		bta-miR-33b	-1.64999	4.27228		bta-miR-144	-1.44924	2.77487
bta-miR-125b	1.6331	11.5888		bta-miR-574	-1.85367	5.50996		bta-miR-363	-1.62037	3.94082		bta-miR-425-5p	-1.36555	7.66564
bta-miR-183	1.78578	7.45074		bta-miR-15a	-1.84277	8.1717		bta-miR-504	-1.55758	4.50182		bta-miR-200b	-1.33045	7.26183
bta-miR-380-3p	1.79288	6.92757		bta-miR-18a	-1.804	5.42275		bta-miR-144	-1.51561	3.33799		bta-miR-2332	-1.25329	2.27428
bta-miR-1271	1.91149	5.3372		bta-miR-gx107	-1.7819	6.9251		bta-miR-gx253	-1.47348	4.5713		bta-miR-2285g	-1.23206	2.73593
bta-miR-424-5p	1.92451	6.55618		bta-miR-146a	-1.76748	8.06483		bta-miR-gx165	-1.44757	3.86506		bta-miR-96	-1.22875	2.53134
bta-miR-708	1.95114	4.85804		bta-miR-425-3p	-1.75826	3.59077		bta-miR-425-5p	-1.39678	7.99176		bta-miR-139	-1.17118	5.75726
bta-miR-432	2.01438	5.88767		bta-miR-6524	-1.75234	5.17516		bta-miR-2332	-1.38439	2.77484		bta-miR-200c	-1.14591	8.95463
bta-miR-381	2.02467	8.27251		bta-miR-378b	-1.72864	4.55153		bta-miR-425-3p	-1.37543	3.7517		bta-miR-29a	-1.1403	7.83099
bta-miR-127	2.06865	13.6055		bta-miR-363	-1.71417	3.99344		bta-miR-gx94	-1.3192	2.44056		bta-miR-744	-1.12911	4.50654
bta-miR-665	2.11954	5.34615		bta-miR-29b	-1.69611	3.35128		bta-miR-191	-1.29527	12.8493		bta-miR-338	-1.1205	5.67778
bta-miR-99a-5p	2.127	10.0884		bta-miR-gx91	-1.66827	3.52042		bta-miR-15a	-1.27324	8.33153		bta-miR-181a	-1.00274	13.0956
bta-miR-494	2.14493	4.15267		bta-miR-378c	-1.61445	7.12129		bta-miR-6517	-1.2708	2.16719		bta-miR-148a	-0.982245	14.1208
bta-let-7c	2.15191	10.2336		bta-miR-gx169	-1.57508	4.75054		bta-miR-451	-1.25704	6.56141		bta-miR-200a	-0.968371	9.22941
bta-miR-136	2.1843	6.49812		bta-miR-451	-1.54898	6.99482		bta-miR-2285t	-1.22457	2.46463		bta-miR-301b	-0.905093	4.78908
bta-miR-493	2.25624	5.89273		bta-miR-29a	-1.50302	7.45184		bta-miR-29a	-1.20978	8.0809		bta-miR-183	-0.876914	7.29399
bta-miR-410	2.2943	8.61834		bta-miR-2285g	-1.50299	2.30434		bta-miR-gx91	-1.20959	3.80025		bta-miR-652	-0.870548	6.23842
bta-miR-411a	2.35407	12.3068		bta-miR-200a	-1.49621	9.4564		bta-miR-181a	-1.19123	13.392		bta-miR-2285k	-0.823076	5.0164
bta-miR-10a	2.38435	14.981		bta-miR-744	-1.45047	4.41176		bta-miR-200b	-1.17049	7.58761		bta-miR-2284z	-0.76584	4.81919
bta-miR-369-3p	2.38742	6.40849		bta-miR-95	-1.39161	2.0206		bta-miR-200c	-1.16775	9.04273		bta-miR-181b	-0.713459	8.56169
bta-miR-379	2.42448	4.95323		bta-miR-2284aa	-1.36898	3.06371		bta-miR-301b	-1.15956	4.82251		bta-miR-342	-0.711877	8.40241
bta-miR-96	2.46321	4.45697		bta-miR-505	-1.36633	4.15463		bta-miR-17-3p	-1.12544	4.77629		bta-miR-451	-0.690765	6.366
bta-miR-365-3p	2.52958	5.48689		bta-miR-191	-1.35992	12.5708		bta-miR-505	-1.12042	4.39002		bta-miR-455-5p	-0.685815	5.29393
bta-miR-382	2.53459	3.18357		bta-miR-2336	-1.34775	4.53885		bta-miR-378b	-1.04313	4.83986		bta-miR-92b	-0.642526	8.02712
bta-miR-485	2.73488	2.30373		bta-miR-223	-1.30675	5.31181		bta-miR-2284aa	-1.04036	3.16271		bta-miR-148b	-0.602308	9.34803
bta-miR-409a	2.73731	5.12268		bta-miR-200b	-1.29793	7.38719		bta-miR-200a	-1.02269	9.69471		bta-miR-199b	0.600159	9.19946
bta-miR-149-5p	2.85371	5.52085		bta-miR-345-5p	-1.25669	2.82198		bta-miR-185	-0.989039	3.80208		bta-miR-19b	0.666239	8.01859
bta-miR-154b	3.08171	3.19574		bta-miR-429	-1.24927	9.54682		bta-miR-128	-0.944805	7.25801		bta-miR-1839	0.677171	6.29475
bta-miR-193a-3p	3.12725	5.80307		bta-miR-128	-1.19305	7.05588		bta-miR-2284z	-0.940856	5.18593		bta-miR-101	0.735091	10.5264
bta-miR-655	3.13406	3.45451		bta-miR-17-5p	-1.17797	6.77527		bta-miR-155	-0.902275	7.18036		bta-miR-126-3p	0.745842	10.274
bta-miR-193b	3.38647	6.74007		bta-miR-139	-1.14447	5.94687		bta-miR-339b	-0.899622	6.38573		bta-miR-19a	0.767891	5.97269
bta-miR-34c	3.45536	2.79599		bta-miR-21-3p	-1.13752	7.98766		bta-miR-139	-0.891335	6.06678		bta-miR-381	0.794997	7.7034
bta-miR-2484	3.71	1.8269		bta-miR-22-5p	-1.08427	3.88456		bta-miR-652	-0.877641	6.61256		bta-miR-320a	0.799068	9.34468
bta-miR-376b	3.87468	3.26889		bta-miR-32	-1.07904	7.00467		bta-miR-181b	-0.869335	8.99006		bta-miR-125b	0.810101	10.3439
bta-miR-483	8.41867	3.19263		bta-miR-21-5p	-1.04689	14.2684		bta-miR-1307	-0.836082	6.57608		bta-miR-410	0.8245	7.74328
bta-miR-205	13.0965	11.5551		bta-miR-15b	-1.02375	6.41171		bta-miR-326	-0.825477	5.08338		bta-miR-296	0.842214	5.91381
				bta-miR-16b	-0.977864	10.303		bta-miR-338	-0.819689	6.26105		bta-miR-380-3p	0.848285	6.58573
				bta-miR-652	-0.968122	6.52455		bta-miR-146b	-0.817246	6.90861		bta-miR-99a-5p	0.860449	8.64595
				bta-miR-185	-0.930056	3.61348		bta-miR-32	-0.803181	7.13491		bta-miR-532	0.860739	7.94521
				bta-miR-17-3p	-0.912731	4.86424		bta-miR-455-5p	-0.802987	5.85595		bta-miR-127	0.876394	13.48
				bta-miR-6120-3p	-0.901255	4.0225		bta-miR-2285k	-0.750502	5.10306		bta-let-7b	0.882041	10.4674
				bta-miR-106b	-0.865887	7.17534		bta-miR-2336	-0.741292	4.70017		bta-miR-33a	0.883109	3.95036
				bta-miR-497	-0.834907	8.06452		bta-miR-92a	-0.691021	13.271		bta-miR-154c	0.88379	6.4131
				bta-miR-504	-0.816162	4.38439		bta-miR-486	-0.661504	8.86805		bta-miR-211	0.885008	4.00478
				bta-miR-454	-0.784663	4.38211		bta-miR-342	-0.648851	8.60341		bta-miR-143	0.897665	19.0043
				bta-miR-339b	-0.780032	6.40114		bta-miR-106b	-0.63678	7.3002		bta-miR-gx67	0.898293	3.72779
				bta-miR-20a	-0.754235	6.38703		bta-miR-148a	-0.635154	14.2933		bta-let-7a-5p	0.924109	12.9806
				bta-miR-2284z	-0.742204	5.25636		bta-miR-25	-0.604215	11.2814		bta-miR-301a	0.965855	8.91403
				bta-miR-769	-0.739311	7.50597		bta-miR-143	0.60657	18.7618		bta-miR-490	1.01093	7.06995
				bta-miR-31	-0.734192	8.22237		bta-miR-424-5p	0.656771	6.60977		bta-miR-665	1.0186	4.54648
				bta-miR-103	-0.731406	10.6334		bta-miR-381	0.664478	8.2265		bta-miR-378c	1.03794	6.89999
				bta-miR-342	-0.717952	8.53092		bta-miR-487b	0.664999	5.57619		bta-miR-136	1.0614	5.83757
				bta-miR-455-5p	-0.704475	5.67798		bta-miR-222	0.675247	8.29036		bta-miR-27a-3p	1.0803	10.488
				bta-miR-155	-0.699492	7.01112		bta-miR-30f	0.679335	7.2057		bta-miR-30a-5p	1.09316	12.9392
				bta-miR-16a	-0.688427	8.78176		bta-miR-320a	0.680951	9.55526		bta-miR-133a	1.12374	9.0683
				bta-miR-338	-0.649537	6.35696		bta-miR-126-3p	0.690876	10.8304		bta-miR-gx107	1.14931	6.70181
				bta-miR-484	-0.63866	7.37813		bta-miR-378	0.69256	13.663		bta-miR-gx35	1.15386	6.22544
				bta-miR-296	0.633796	5.73371		bta-miR-133a	0.700973	8.8081		bta-miR-335	1.15543	5.57808
				bta-let-7i	0.637642	12.226		bta-miR-26a	0.731074	14.8472		bta-miR-432	1.16949	6.04156
				bta-let-7a-3p	0.646294	5.17149		bta-miR-24-3p	0.74602	8.9302		bta-miR-3431	1.17104	5.21868
				bta-miR-1468	0.670801	10.072		bta-miR-27b	0.761602	15.124		bta-miR-23a	1.20412	9.20188
				bta-miR-320a	0.710251	9.48191		bta-miR-199b	0.770363	9.73014		bta-miR-328	1.20903	3.9493
				bta-miR-450b	0.725639	7.53428		bta-let-7a-3p	0.771024	5.57177		bta-miR-411c-5p	1.22089	5.7088
				bta-miR-450a	0.730097	5.88889		bta-miR-152	0.779615	6.75355		bta-miR-493	1.23597	5.28085
				bta-miR-210	0.738211	6.80423		bta-let-7a-5p	0.794976	13.2108		bta-miR-2285e	1.25199	2.3858
				bta-miR-130a	0.765544	9.42728		bta-miR-99b	0.804077	9.98179		bta-miR-411a	1.26399	11.6179
				bta-miR-328	0.772201	3.557		bta-miR-494	0.80928	4.28648		bta-miR-378	1.28221	13.4089
				bta-miR-214	0.809955	6.45664		bta-miR-490	0.817048	6.90942		bta-miR-30f	1.29548	7.03477
				bta-miR-490	0.817633	6.9217		bta-miR-654	0.850774	3.49961		bta-miR-2904	1.3005	2.38285
				bta-miR-gx67	0.827871	2.96008		bta-miR-23b-3p	0.85099	10.5014		bta-miR-708	1.33238	4.46273
				bta-miR-1343-3p	0.828515	3.98692		bta-miR-34a	0.878517	4.1768		bta-miR-655	1.3439	3.70889
				bta-miR-27b	0.847839	14.8992		bta-miR-gx62	0.879064	4.228		bta-miR-543	1.3625	2.32815
				bta-miR-654	0.863691	3.26096		bta-miR-30a-5p	0.880553	13.1312		bta-miR-99a-3p	1.4091	5.00868
				bta-miR-181d	0.907591	6.10597		bta-miR-1343-3p	0.885042	4.24712		bta-miR-224	1.41199	5.47546
				bta-miR-542-5p	0.908052	3.09342		bta-miR-125a	0.892898	10.7919		bta-miR-24	1.4316	2.6233
				bta-let-7a-5p	0.917742	13.0631		bta-miR-495	0.917612	4.06553		bta-miR-331	1.44096	7.29177
				bta-miR-30f	0.934439	7.26353		bta-miR-410	0.924986	8.37733		bta-miR-499	1.51272	2.25287
				bta-miR-502b	0.954128	2.96074		bta-miR-199a-5p	0.934541	9.23488		bta-miR-gx165	1.54705	2.94583
				bta-miR-362-5p	0.95761	2.56136		bta-miR-380-3p	0.941068	6.94583		bta-miR-154b	1.54734	3.61156
				bta-miR-183	0.967474	6.49082		bta-miR-542-5p	0.972422	3.20137		bta-miR-10a	1.6275	14.9356
				bta-miR-23b-3p	1.00748	10.3243		bta-miR-136	1.02019	6.45711		bta-let-7c	1.62865	10.0939
				bta-miR-487b	1.03915	5.86149		bta-miR-376b	1.03586	3.36407		bta-miR-149-5p	1.66399	5.3298
				bta-miR-218	1.04531	6.26949		bta-miR-708	1.05928	4.95186		bta-miR-369-3p	1.69634	5.67748
				bta-miR-143	1.07278	18.6629		bta-miR-149-5p	1.06916	5.36288		bta-miR-193a-5p	1.80236	3.12045
				bta-miR-24-3p	1.08993	8.76097		bta-let-7b	1.09551	10.5163		bta-miR-188	1.80291	2.33266
				bta-miR-411c-3p	1.10263	2.76832		bta-miR-449a	1.11543	2.30959		bta-miR-gx169	1.8637	4.89557
				bta-miR-27a-3p	1.10327	10.334		bta-miR-154c	1.14112	6.8421		bta-miR-145	1.98804	11.9473
				bta-miR-382	1.11795	3.54488		bta-miR-296	1.17141	5.83163		bta-miR-gx62	2.05511	3.94219
				bta-miR-199a-3p	1.12907	11.8372		bta-miR-gx67	1.19453	3.39904		bta-miR-494	2.22895	3.68456
				bta-miR-30a-5p	1.14682	13.1969		bta-miR-376e	1.19577	3.17902		bta-miR-147	2.29687	6.30492
				bta-miR-145	1.18308	11.186		bta-miR-1247-5p	1.20308	2.14021		bta-miR-31	2.43239	8.81084
				bta-miR-133a	1.19294	8.86726		bta-miR-328	1.22446	3.87366		bta-miR-483	2.44977	3.09958
				bta-miR-495	1.20009	4.07878		bta-miR-411c-5p	1.22461	6.30634		bta-miR-210	2.4506	6.80973
				bta-miR-381	1.20411	8.59152		bta-miR-31	1.23952	9.19735		bta-miR-365-3p	2.45645	6.43465
				bta-miR-3431	1.22683	5.73172		bta-miR-1185	1.26694	3.27677		bta-miR-193b	2.98477	7.87365
				bta-miR-26a	1.2298	14.8212		bta-miR-27a-3p	1.28088	10.7558		bta-miR-204	3.08734	9.40408
				bta-miR-767	1.25085	3.47526		bta-miR-188	1.30618	2.50436		bta-miR-193a-3p	4.04794	8.14661
				bta-miR-149-5p	1.2612	5.26943		bta-miR-10b	1.31118	14.4998		bta-miR-205	11.6588	11.9296
				bta-miR-193a-5p	1.26547	2.43782		bta-miR-433	1.31152	2.23613
				bta-let-7b	1.27945	10.3976		bta-miR-379	1.3136	5.21905
				bta-miR-193a-3p	1.32526	6.4259		bta-miR-335	1.31586	6.11237
				bta-miR-152	1.35853	6.92324		bta-miR-27a-5p	1.32419	2.82922
				bta-miR-376b	1.37326	3.59406		bta-miR-127	1.34554	13.579
				bta-miR-23a	1.39624	8.82729		bta-miR-125b	1.35493	10.4665
				bta-miR-376e	1.39815	3.38808		bta-miR-100	1.37206	9.19479
				bta-miR-154c	1.42571	6.93435		bta-miR-369-3p	1.37593	6.37991
				bta-miR-433	1.43402	2.07083		bta-miR-502b	1.38577	3.20008
				bta-miR-224	1.44985	5.71443		bta-miR-145	1.39607	11.5357
				bta-miR-424-5p	1.46537	6.72642		bta-miR-493	1.40954	6.00835
				bta-miR-199b	1.46757	9.75689		bta-miR-362-5p	1.42837	2.95615
				bta-miR-10b	1.47072	14.4219		bta-miR-99a-3p	1.44276	5.39883
				bta-miR-424-3p	1.47166	2.73733		bta-miR-452	1.46756	3.26551
				bta-miR-147	1.48446	5.53654		bta-miR-411a	1.48405	11.9692
				bta-miR-411c-5p	1.52284	6.38871		bta-miR-543	1.49873	2.5046
				bta-miR-379	1.53338	5.39761		bta-miR-gx35	1.50221	6.9696
				bta-miR-452	1.53579	3.28488		bta-miR-369-5p	1.50402	4.58899
				bta-miR-369-3p	1.53837	6.52179		bta-miR-432	1.51166	6.51619
				bta-miR-370	1.54	2.70848		bta-miR-23a	1.53017	9.30655
				bta-miR-125a	1.56096	11.2033		bta-miR-487a	1.56077	2.31069
				bta-miR-1185	1.56945	3.27629		bta-miR-224	1.62099	5.76586
				bta-miR-136	1.58717	6.88796		bta-miR-3431	1.64741	5.52841
				bta-miR-2285e	1.59644	2.46126		bta-miR-665	1.72136	5.0897
				bta-miR-gx190	1.59714	2.99083		bta-let-7c	1.73514	10.461
				bta-miR-199a-5p	1.61972	9.48966		bta-miR-193a-5p	1.79126	2.76404
				bta-miR-1271	1.64975	3.44437		bta-miR-655	1.82058	3.76357
				bta-miR-543	1.67479	2.7294		bta-miR-299	1.91363	2.98221
				bta-miR-410	1.69422	8.81367		bta-miR-99a-5p	1.93233	8.74998
				bta-miR-99b	1.71924	10.0554		bta-miR-210	1.94845	7.41993
				bta-miR-380-3p	1.75241	7.03237		bta-miR-10a	2.3016	14.7225
				bta-miR-369-5p	1.77195	4.72921		bta-miR-154b	2.37168	3.57144
				bta-miR-96	1.83882	2.6384		bta-miR-483	2.51106	3.42714
				bta-miR-335	1.84353	6.28932		bta-miR-365-3p	2.68872	6.39803
				bta-miR-487a	1.85902	2.58373		bta-miR-147	2.79916	6.58317
				bta-miR-127	1.89579	13.6745		bta-miR-193a-3p	3.1975	8.14484
				bta-miR-gx35	1.96732	7.03733		bta-miR-193b	3.19799	7.87298
				bta-miR-99a-3p	1.98141	5.4632		bta-miR-204	3.30262	9.43743
				bta-miR-432	2.04594	6.68815		bta-miR-205	13.8122	12.2369
				bta-miR-411a	2.08848	12.2247
				bta-miR-665	2.11389	5.57769
				bta-miR-493	2.13839	6.27098
				bta-miR-100	2.1436	9.6187
				bta-miR-655	2.18791	3.68412
				bta-miR-485	2.22651	2.16572
				bta-miR-299	2.37887	3.32583
				bta-miR-154b	2.37918	3.75627
				bta-miR-1247-5p	2.46117	2.76466
				bta-let-7c	2.46981	10.6713
				bta-miR-125b	2.49916	11.0197
				bta-miR-365-3p	2.58635	5.61303
				bta-miR-99a-5p	2.74137	9.08797
				bta-miR-193b	2.74768	7.06984
				bta-miR-10a	2.77306	14.9832
				bta-miR-409a	2.8539	2.95992
				bta-miR-483	2.98014	3.86243
				bta-miR-204	3.16234	9.08385
				bta-miR-34c	4.88822	3.03216
				bta-miR-205	14.3026	11.7257

## Sheet: MJ VS IL
	logFC	logCPM			logFC	logCPM			logFC	logCPM			logFC	logCPM
bta-miR-196b	-11.5987	8.49242		bta-miR-196a	-7.77823	6.15963		bta-miR-196a	-6.94069	6.4837		bta-miR-196b	-4.17871	7.20613
bta-miR-196a	-4.56961	6.91756		bta-miR-196b	-7.04439	6.56289		bta-miR-196b	-6.70849	6.97331		bta-miR-196a	-4.0761	6.58131
bta-miR-483	-3.53875	2.01394		bta-miR-146b	-3.97376	8.87535		bta-miR-gx191	-3.7406	2.12007		bta-miR-20b	-3.25725	5.16453
bta-miR-10b	-2.73208	16.2414		bta-miR-10b	-3.48003	16.1643		bta-miR-10a	-3.16634	15.3935		bta-miR-gx1	-3.06291	2.37415
bta-miR-2285t	-2.58886	2.22708		bta-miR-10a	-3.3921	15.5765		bta-miR-gx1	-3.04056	2.18095		bta-miR-18b	-2.9415	3.51919
bta-miR-205	-2.50214	3.01261		bta-miR-378b	-2.86656	7.26059		bta-miR-20b	-2.98372	4.68005		bta-miR-363	-2.72435	6.51483
bta-miR-147	-1.91957	4.82081		bta-miR-874	-2.68861	5.21071		bta-miR-10b	-2.96535	15.7781		bta-miR-874	-2.1791	5.98917
bta-miR-376b	-1.82133	2.00718		bta-miR-20b	-2.67172	4.48919		bta-miR-18b	-2.71905	3.34625		bta-miR-gx251	-2.12404	2.72459
bta-miR-542-5p	-1.66586	2.42753		bta-miR-146a	-2.66307	10.5888		bta-miR-874	-2.54503	5.57071		bta-miR-106a	-2.04304	4.61833
bta-miR-10a	-1.63743	14.9976		bta-miR-2285k	-2.58877	6.57214		bta-miR-363	-2.49761	6.12095		bta-miR-gx11	-1.95895	4.04964
bta-miR-324	-1.6101	2.88991		bta-miR-363	-2.45785	6.27985		bta-miR-146b	-2.32387	8.62708		bta-miR-6523	-1.95289	2.07698
bta-miR-382	-1.56734	2.79825		bta-miR-2318	-2.14103	2.96996		bta-miR-146a	-2.15688	10.958		bta-miR-gx191	-1.93867	2.30028
bta-miR-193b	-1.5024	5.3944		bta-miR-gx251	-2.10555	2.05849		bta-miR-gx95	-2.15168	2.46591		bta-miR-10b	-1.9154	15.9482
bta-miR-424-5p	-1.28417	5.54946		bta-miR-gx67	-2.00116	3.63348		bta-miR-191	-2.08358	14.727		bta-miR-2376	-1.8884	2.38858
bta-miR-155	-1.04801	6.97145		bta-miR-191	-1.99853	14.4702		bta-miR-106a	-2.06524	4.21038		bta-miR-2285k	-1.87865	6.84332
bta-miR-200c	1.01866	8.45914		bta-miR-gx11	-1.93249	3.6905		bta-miR-gx11	-2.03174	3.02635		bta-miR-gx6	-1.82053	3.74868
bta-miR-204	1.0216	8.09068		bta-miR-486	-1.88111	10.6669		bta-miR-2285k	-2.01895	6.71969		bta-miR-gx7	-1.79318	2.36638
bta-miR-339b	1.02456	6.25244		bta-miR-129	-1.86953	2.29617		bta-miR-2318	-1.78832	2.89281		bta-miR-gx158	-1.76554	2.60705
bta-miR-141	1.03159	11.9436		bta-miR-129-5p	-1.86953	2.29617		bta-miR-155	-1.70121	8.6109		bta-miR-10a	-1.75955	15.2216
bta-miR-423-5p	1.04551	8.90138		bta-miR-2376	-1.82802	2.12994		bta-miR-gx67	-1.67306	3.62828		bta-miR-146a	-1.72608	11.3809
bta-miR-gx120	1.122	5.86291		bta-miR-155	-1.81837	8.5376		bta-miR-gx251	-1.6711	2.59457		bta-miR-92b	-1.6384	9.57982
bta-miR-339a	1.1826	8.46689		bta-miR-92b	-1.76123	9.59004		bta-miR-92b	-1.63584	9.33394		bta-miR-142-3p	-1.53537	9.06183
bta-miR-130b	1.298	6.43047		bta-miR-18b	-1.60645	2.45991		bta-miR-gx102	-1.61309	2.23855		bta-miR-2318	-1.52798	2.83212
bta-miR-132	1.30667	5.28559		bta-miR-1246	-1.55576	3.31253		bta-miR-449a	-1.60346	2.55195		bta-miR-146b	-1.52731	9.2242
bta-miR-gx204	1.47934	3.552		bta-miR-gx6	-1.54738	2.38381		bta-miR-gx6	-1.52396	2.68136		bta-miR-2285t	-1.48955	4.0938
bta-miR-138	1.6032	4.5158		bta-miR-425-3p	-1.52902	5.0949		bta-miR-gx158	-1.42721	2.56243		bta-miR-155	-1.44984	8.87962
bta-miR-223	1.73473	5.91643		bta-miR-99a-5p	-1.51516	8.07134		bta-miR-99a-5p	-1.35325	8.24265		bta-miR-gx95	-1.30068	3.09118
bta-miR-192	1.77767	18.4781		bta-miR-1271	-1.48117	3.06626		bta-miR-100	-1.30935	9.08538		bta-miR-142-5p	-1.29412	13.2439
bta-miR-1388-3p	1.93297	5.58434		bta-miR-106a	-1.37838	4.08714		bta-miR-1246	-1.30746	3.9494		bta-miR-1271	-1.28063	4.85651
bta-miR-6524	1.95512	5.43459		bta-miR-96	-1.37364	2.03628		bta-miR-6522	-1.30447	2.51373		bta-miR-gx67	-1.24739	4.16522
bta-miR-194	2.27965	14.0909		bta-miR-gx163	-1.37284	2.54295		bta-miR-486	-1.26735	9.8821		bta-miR-191	-1.19985	15.0604
bta-miR-1388-5p	2.52276	8.32982		bta-miR-2285t	-1.32729	2.79451		bta-miR-296	-1.25415	5.85075		bta-miR-gx91	-1.1351	4.24422
bta-miR-211	2.75016	5.43569		bta-miR-100	-1.3169	8.93154		bta-miR-2285t	-1.22016	3.54373		bta-miR-2285q	-1.0782	4.45962
bta-miR-215	4.8577	16.2146		bta-miR-99b	-1.28615	9.69509		bta-miR-gx106	-1.14859	2.34017		bta-miR-2478	-1.07347	6.05532
bta-miR-31	6.23139	7.41411		bta-miR-142-5p	-1.26857	13.0894		bta-miR-183	-1.137	6.95945		bta-miR-21-3p	-1.06524	9.02745
bta-miR-gx192	6.43016	5.1743		bta-miR-15b	-1.26005	7.62336		bta-miR-142-3p	-1.13219	9.00983		bta-miR-147	-1.05387	5.53049
				bta-miR-379	-1.25756	5.11438		bta-miR-15b	-1.13173	7.65763		bta-miR-6119-5p	-0.99982	10.0122
				bta-miR-6120-3p	-1.21663	5.05207		bta-miR-2285g	-1.1112	3.47477		bta-miR-223	-0.947292	7.42394
				bta-miR-gx158	-1.20274	2.11564		bta-miR-99b	-1.10127	10.1522		bta-miR-6120-3p	-0.944156	5.42037
				bta-miR-2285q	-1.18684	4.58455		bta-miR-425-3p	-1.09983	4.82858		bta-miR-15b	-0.930774	7.88628
				bta-miR-gx190	-1.18361	2.53857		bta-miR-1271	-1.0605	4.29592		bta-miR-2336	-0.927972	4.85568
				bta-miR-2285g	-1.1831	3.43766		bta-miR-147	-1.03345	5.15646		bta-miR-425-3p	-0.908772	5.09216
				bta-miR-183	-1.0574	6.52609		bta-miR-6120-3p	-0.974115	5.356		bta-miR-708	-0.881637	4.30713
				bta-miR-365-3p	-1.01439	4.3592		bta-miR-193b	-0.910242	5.98566		bta-miR-29c	-0.875759	6.58647
				bta-miR-142-3p	-1.00547	8.66424		bta-miR-126-5p	-0.89712	12.8901		bta-miR-296	-0.86158	6.14889
				bta-miR-16a	-0.9492	9.68668		bta-miR-125a	-0.861518	10.7503		bta-miR-193b	-0.831826	6.40452
				bta-miR-193b	-0.867078	5.63467		bta-miR-223	-0.856429	6.68447		bta-miR-29a	-0.831786	8.97915
				bta-miR-2478	-0.782191	5.68626		bta-miR-6119-5p	-0.795722	9.98623		bta-miR-25	-0.818874	11.8518
				bta-miR-24-3p	-0.756657	8.51494		bta-miR-16a	-0.78987	9.76913		bta-miR-16a	-0.787533	9.80902
				bta-miR-223	-0.720213	6.29667		bta-miR-2478	-0.774989	5.77474		bta-miR-93	-0.786615	9.85952
				bta-miR-147	-0.715412	5.04169		bta-miR-21-3p	-0.772813	8.82082		bta-miR-150	-0.786483	8.92156
				bta-miR-9-5p	-0.71522	6.85437		bta-miR-142-5p	-0.769937	13.0697		bta-miR-128	-0.765029	7.70248
				bta-miR-126-5p	-0.679152	12.8509		bta-miR-374a	-0.751611	6.22043		bta-miR-16b	-0.732635	11.2559
				bta-miR-16b	-0.675725	11.1403		bta-miR-2285q	-0.738987	4.50406		bta-miR-19a	-0.731804	6.1751
				bta-miR-25	-0.647284	11.7669		bta-miR-16b	-0.723653	11.1859		bta-miR-92a	-0.723051	13.5507
				bta-miR-125a	-0.6385	10.5536		bta-miR-29c	-0.658213	6.36593		bta-miR-425-5p	-0.710711	8.80193
				bta-miR-181b	-0.609504	9.58776		bta-miR-150	-0.630359	8.83078		bta-miR-181b	-0.649039	9.44841
				bta-miR-130a	0.630992	8.77053		bta-miR-338	-0.617538	6.90377		bta-miR-106b	-0.616205	7.55586
				bta-miR-133a	0.641204	7.90179		bta-miR-151-5p	-0.614299	11.2948		bta-miR-15a	-0.611945	8.62009
				bta-miR-139	0.687287	6.17547		bta-miR-1468	0.608957	9.34864		bta-miR-1468	0.606736	9.31596
				bta-let-7e	0.692127	8.58359		bta-miR-23b-3p	0.635329	9.71281		bta-miR-423-5p	0.621863	8.56736
				bta-miR-429	0.703307	9.80101		bta-miR-411a	0.640708	10.6934		bta-miR-132	0.683512	6.40109
				bta-miR-22-3p	0.735675	13.6571		bta-miR-320a	0.696962	8.84574		bta-miR-127	0.700855	12.9079
				bta-miR-451	0.748454	7.31981		bta-miR-339a	0.727572	7.6111		bta-miR-130b	0.762452	7.73821
				bta-miR-335	0.778558	4.88156		bta-miR-432	0.75486	5.19629		bta-miR-183	0.796947	7.50764
				bta-miR-gx35	0.781936	5.48469		bta-miR-145	0.763636	10.2711		bta-miR-200a	0.819873	9.47664
				bta-miR-200a	0.803146	9.70225		bta-miR-204	0.786988	6.63596		bta-miR-139	0.877368	6.05707
				bta-miR-505	0.807416	4.45351		bta-miR-200a	0.787658	9.72527		bta-miR-6524	0.926472	5.1811
				bta-miR-326	0.815975	4.76962		bta-miR-423-5p	0.832798	8.83199		bta-miR-369-3p	0.999299	4.36769
				bta-miR-652	0.82914	6.64583		bta-miR-30b-5p	0.859821	9.62795		bta-miR-411a	1.04726	10.6457
				bta-miR-493	0.882351	4.61298		bta-miR-411c-5p	0.863637	5.15047		bta-miR-145	1.0732	10.3798
				bta-miR-30b-5p	0.884663	9.63867		bta-miR-107	0.872117	7.94927		bta-miR-378	1.08258	12.4024
				bta-miR-410	0.898733	7.4236		bta-miR-6524	0.875766	5.62188		bta-miR-204	1.1008	6.96983
				bta-miR-1307	0.914881	7.02287		bta-miR-335	0.891859	4.87234		bta-miR-574	1.11127	5.62697
				bta-miR-154c	0.916357	5.78913		bta-miR-532	0.898635	7.9439		bta-miR-182	1.11605	10.0138
				bta-miR-107	0.946692	8.07191		bta-miR-490	0.91049	5.98724		bta-miR-23b-3p	1.12541	9.98175
				bta-miR-369-3p	0.960591	5.28532		bta-miR-139	0.921946	6.06153		bta-miR-136	1.13353	4.89737
				bta-miR-339a	0.961591	7.48385		bta-miR-497	0.928973	8.13674		bta-miR-200c	1.13404	9.1499
				bta-miR-532	0.985921	7.87647		bta-miR-200c	0.979789	9.07318		bta-miR-1	1.13874	3.54721
				bta-miR-99a-3p	0.988986	3.91405		bta-miR-22-5p	0.987634	3.8112		bta-miR-451	1.15134	6.41187
				bta-miR-101	0.989525	10.7358		bta-miR-99a-3p	0.995111	4.17515		bta-miR-487b	1.16211	4.46109
				bta-miR-411c-5p	1.01719	5.14694		bta-miR-665	1.00178	3.64244		bta-miR-192	1.24341	17.465
				bta-miR-6524	1.06646	5.46424		bta-miR-331	1.06402	6.85284		bta-miR-380-3p	1.2747	5.7763
				bta-miR-224	1.09562	4.49746		bta-miR-30f	1.07264	6.41195		bta-miR-432	1.29117	5.01185
				bta-miR-320a	1.13311	8.69025		bta-miR-101	1.09224	10.665		bta-miR-493	1.30477	4.20905
				bta-miR-1388-3p	1.16123	6.08959		bta-miR-149-5p	1.1197	4.33995		bta-miR-99a-3p	1.32808	3.76934
				bta-miR-30f	1.19432	6.34577		bta-miR-1388-3p	1.12411	5.90068		bta-miR-654	1.34566	2.51506
				bta-miR-149-5p	1.1949	4.20813		bta-miR-654	1.16573	2.64738		bta-miR-381	1.34759	6.93223
				bta-miR-136	1.21563	5.52395		bta-miR-424-5p	1.17928	5.75311		bta-miR-378b	1.3835	4.36705
				bta-miR-gx34	1.22309	3.97789		bta-miR-451	1.17947	6.5906		bta-miR-200b	1.39121	7.45591
				bta-let-7d	1.24331	8.44958		bta-miR-132	1.2001	6.65699		bta-miR-193a-3p	1.40504	4.40436
				bta-miR-381	1.27575	7.43477		bta-miR-gx35	1.20686	5.48779		bta-miR-215	1.41279	15.0773
				bta-miR-424-5p	1.27606	5.48756		bta-miR-192	1.22526	17.7335		bta-miR-655	1.43546	2.53633
				bta-miR-497	1.29207	7.93954		bta-miR-487b	1.2326	4.71131		bta-miR-490	1.47729	6.06591
				bta-miR-1306	1.38752	3.69654		bta-miR-380-3p	1.23523	5.9172		bta-miR-gx35	1.50084	5.12692
				bta-miR-192	1.39653	17.9469		bta-miR-211	1.25529	6.18838		bta-miR-154b	1.53637	2.27945
				bta-miR-200b	1.43084	7.37013		bta-miR-154c	1.25773	5.67962		bta-miR-410	1.55763	6.88652
				bta-miR-375	1.44682	11.4395		bta-miR-369-3p	1.26911	5.06386		bta-miR-154c	1.63309	5.50265
				bta-miR-145	1.4607	9.9641		bta-miR-574	1.2713	5.71117		bta-miR-2332	1.66683	2.40091
				bta-miR-gx120	1.46349	8.07572		bta-miR-200b	1.2721	7.52773		bta-miR-194	1.71841	13.3204
				bta-miR-487b	1.47984	4.86056		bta-miR-33a	1.30823	3.76524		bta-miR-495	1.83256	2.78139
				bta-miR-132	1.48207	6.25229		bta-miR-gx88	1.32254	2.53636		bta-miR-369-5p	1.84939	3.14609
				bta-miR-339b	1.4948	6.27778		bta-miR-495	1.32746	3.11823		bta-miR-153	1.95787	3.93589
				bta-miR-200c	1.49668	9.07433		bta-miR-493	1.38505	4.65829		bta-miR-gx120	2.03881	8.06892
				bta-miR-gx130	1.63874	2.77966		bta-miR-136	1.39063	5.3369		bta-miR-375	2.26292	11.8648
				bta-miR-193a-3p	1.6548	5.04175		bta-miR-gx62	1.41678	3.34744		bta-miR-gx204	2.48465	6.06018
				bta-miR-495	1.69273	3.00688		bta-miR-193a-3p	1.44204	5.04725		bta-miR-gx250	3.33006	3.61959
				bta-miR-490	1.81466	5.90169		bta-miR-381	1.45612	7.30015		bta-miR-31	4.76179	6.55536
				bta-miR-378	1.8959	12.6176		bta-miR-33b	1.50002	4.33451		bta-miR-gx192	5.95084	7.44691
				bta-miR-331	1.89729	6.43738		bta-miR-130b	1.52994	7.88095
				bta-miR-22-5p	2.0699	3.86602		bta-miR-382	1.55298	2.67986
				bta-miR-877	2.14719	3.26723		bta-miR-375	1.55832	11.6899
				bta-miR-33b	2.17201	4.98795		bta-miR-378	1.60835	12.6163
				bta-miR-378c	2.20785	7.08482		bta-miR-410	1.63467	7.22176
				bta-miR-gx62	2.27065	3.32056		bta-miR-339b	1.65717	6.17325
				bta-miR-130b	2.29811	8.10832		bta-miR-378b	1.7052	4.69686
				bta-miR-574	2.34235	5.58445		bta-miR-138	1.80586	6.56511
				bta-miR-494	2.48876	3.64143		bta-miR-194	1.87405	13.749
				bta-miR-194	2.54956	14.0364		bta-miR-gx120	1.9146	7.71249
				bta-miR-gx204	2.61762	6.95349		bta-miR-378c	1.92009	6.96887
				bta-miR-423-5p	2.62845	8.30242		bta-miR-gx130	1.93642	2.05035
				bta-miR-gx107	2.66227	6.86194		bta-miR-215	1.95859	15.2852
				bta-miR-138	2.7232	6.46237		bta-miR-2332	2.13575	2.67251
				bta-miR-gx169	2.90824	4.73008		bta-miR-494	2.13986	3.24501
				bta-miR-215	2.99914	15.7348		bta-miR-gx107	2.23102	6.48382
				bta-miR-gx140	3.00901	2.23091		bta-miR-gx165	2.28829	3.80212
				bta-miR-gx170	3.27745	6.75395		bta-miR-gx204	2.56684	6.19571
				bta-miR-gx165	3.54841	4.20549		bta-miR-gx169	2.59035	4.59561
				bta-miR-gx166	3.89128	4.65276		bta-miR-gx250	2.84978	4.04555
				bta-miR-gx133	3.95162	2.96741		bta-miR-gx170	3.08528	6.18488
				bta-miR-gx192	5.85766	7.74818		bta-miR-gx166	3.23903	4.73073
				bta-miR-31	5.88205	7.66694		bta-miR-gx133	3.59751	2.48851
				bta-miR-gx129	7.02932	4.56982		bta-miR-gx140	3.85852	2.12902
								bta-miR-gx129	4.55547	4.10661
								bta-miR-31	5.39944	7.36605
								bta-miR-gx192	5.78596	7.93205
