# Supplementary material for: Potential Regulatory Role of MicroRNAs in the Development of Bovine Gastrointestinal Tract during Early Life
Source: PLoS One. 2014 Mar 28;9(3):e92592. doi: 10.1371/journal.pone.0092592 (PMC3969364; doi:10.1371/journal.pone.0092592)
Supplement: Table S4 — IPA functions of miRNAs selected for further analysis. A total of 47 miRNAs that belonged to 33 families were selected, and their predicted significant IPA function categories were listed. (XLSX) [file pone.0092592.s005.xlsx]

## Sheet: Functional analysis of miRNAs
			Functional analysis
miRNA Family	Selected miRNA	Category	Function category	FDR range	Molecules	Molecules #
miR-10 famlily	bta-miR-10a	Temporal DE miRNA in MJ	Cellular Growth and Proliferation	3.53E-02-7.94E-02	TBX5,TIAM1,TFAP2C,BDNF,HOXA3,E2F3,CRLF3,HAS3,HOXB3,NR4A3,DAZAP1,MAP3K7,GATA6,EPHA5,EBF2,NCOR2,SKIL,NPAS3,MAP4K4,KLF11,BCL2L11	21
	bta-miR-10b	Temporal DE miRNA in MJ	Cellular Development	3.53E-02-7.94E-02	TBX5,NR4A3,TFAP2C,MAP3K7,BDNF,GATA6,EBF2,SKIL,NCOR2,E2F3,NPAS3,BCL2L11	12
			Cell Morphology	3.53E-02-8.79E-02	TIAM1,MAP3K7,BDNF,HCN1,DVL3,SKIL,E2F3,BCL2L11,ANK1	9
			Tissue Development	3.53E-02-7.94E-02	TIAM1,TFAP2C,MAP3K7,BDNF,GATA6,EBF2,SKIL,HAS3,BCL2L11	9
			Cellular Movement	3.53E-02-8.45E-02	NR4A3,TIAM1,MAP3K7,BDNF,GATA6,EBF2,SKIL,E2F3,HAS3	9
			Cell-To-Cell Signaling and Interaction	3.53E-02-8.45E-02	TIAM1,MAP3K7,CYTH1,BDNF,HCN1,EBF2,E2F3,BCL2L11,GRIK1	9
			Tissue Morphology	3.53E-02-7.94E-02	HOXB3,TFAP2C,MAP3K7,BDNF,HOXA3,GATA6,EBF2,BCL2L11	8
			Cell Death and Survival	3.53E-02-8.96E-02	NR4A3,MAP3K7,BDNF,GATA6,SKIL,NCOR2,BCL2L11	7
			Cellular Assembly and Organization	3.53E-02-8.96E-02	CEP350,TIAM1,MAP3K7,BDNF,FNBP1L,DVL3,SKIL	7
			Cellular Function and Maintenance	3.53E-02-8.79E-02	CEP350,TIAM1,BDNF,MAP3K7,HCN1,SKIL,BCL2L11	7
			Cell Cycle	3.53E-02-8.45E-02	NR4A3,HOXB3,GATA6,NCOR2,SKIL,E2F3,CRLF3	7
			Hematological System Development and Function	3.53E-02-8.96E-02	HOXB3,MAP3K7,BDNF,BCL2L11	4
			Connective Tissue Development and Function	3.85E-02-7.94E-02	HOXB3,MAP3K7,SKIL,E2F3	4
			Lymphoid Tissue Structure and Development	3.85E-02-6.67E-02	MAP3K7,NCOR2,BCL2L11	3
			Organ Development	3.85E-02-5.27E-02	TFAP2C,EBF2,BCL2L11	3
			Humoral Immune Response	4.47E-02-7.65E-02	MAP3K7,NCOR2,BCL2L11	3
			Gene Expression	4.59E-02-4.59E-02	TFAP2C,GATA6,NCOR2	3
miR-129 family	bta-miR-129	Positive correlated with total bacterial density in RU	Digestive System Development and Function	3.87E-02-8.58E-01	CACNG2,RBMS1, FMR1	3
			Nervous System Development and Function	1.52E-02-7.03E-02	CACNG2,POU3F1,FMR1	3
			Molecular Transport	3.13E-02-6.32E-02	FMR1,RBMS1,ZBTB20	3
			Cellular Development	4.79E-02-6.9E-02	POU3F1,FMR1,AGO3	3
miR-138 family	bta-miR-138	Temporal DE miRNA in MJ	Gene Expression	1.32E-04-1.82E-01	MAP3K11,NFIX,KDM6B,EIF4EBP2,MACF1,COL4A2,CBX5,EIF4EBP1,TEAD1,GATAD2A,THRAP3,RARA,USP47,CREB1,SMG1,UBP1,AGO1,IMPACT,KLF11,SOX4,NEUROD1,ZNF292,MAP2K7,VEZF1,JAZF1,PPARD,CD3EAP,RHOC,GNG2,DCP1A,SIN3A,CREB3L2,SENP1,BCL11A,SIRT1,TRPS1,NFIB,ING1,DNAJB6,SQSTM1,BAZ1B,SFRP1,ZFP36L2,THRB,DCX,RORB,KDM5A,FOXP4,PSEN1	49
			Tissue Morphology	3.63E-02-1.78E-01	ZFAT,ZNF385A,RIMS2,COL4A2,TEAD1,GATAD2A,RARA,CREB1,SPTB,TET2,SORT1,PLXNB2,UBP1,NEUROD1,SOX4,CLNS1A,VEZF1,ST3GAL6,RELN,ADRA2A,APH1A,SH2B3,BNIP3L,NFIB,DNAJB6,BAZ1B,SFRP1,ZFP36L2,THRB,DCX,PSEN1	31
			Nervous System Development and Function	1.33E-03-1.81E-01	NFIX,RIMS2,SEMA4C,TEAD1,RARA,CREB1,CHST10,PLXNB2,SORT1,PDK1,SOX4,NEUROD1,MAP2K7,NETO1,ATG7,PPARD,RELN,NINJ1,ADCYAP1R1,SLC17A7,SRRM4,APH1A,NFIB,DNAJB6,SFRP1,THRB,DCX,PSEN1	28
			Cell Signaling	3.58E-02-1.67E-01	MAP2K7,MAP3K11,SLX4,PPARD,RELN,KANK1,SENP1,ADRA2A,CACUL1,ADCYAP1R1,APH1A,RARA,ARHGEF3,THRB,RORB,PSEN1	16
			Cellular Movement	1.33E-03-1.67E-01	NFIX,SLC9A3R1,RHOC,CREB1,SIRT1,MACF1,PLXNB2,SEPT11,RELN,DCX,SEMA4C,PSEN1	12
			DNA Replication, Recombination, and Repair	3.33E-02-1.36E-01	SLX4,RARA,SIRT1,ING1,BAZ1B,SUV420H1,CBX5,AGO1	8
			RNA Post-Transcriptional Modification	2.87E-02-1.67E-01	THRAP3,CNOT6L,CNOT8,ZFP36L2,EIF4EBP1	5
miR-143 family	bta-miR-143	Predominant miRNA expressed in GIT	Cellular Development	4.98E-02-1.28E-01	LMO4,FGF9,ITGA6,TET1,IGFBP5,CACNA1A,ETV6,NBN,ABL2,CAT,GDF10,VAPB,CAPRIN1,FOSL2,DCX	15
			Cell Death and Survival	4.98E-02-1.31E-01	ITM2B,FGF9,ITGA6,IGFBP5,ETV6,CACNA1A,NBN,HK2,ATP11C,ABL2,ARID3B,PCMT1,CAT,CAPRIN1	14
			Tissue Development	4.04E-02-1.31E-01	LMO4,ABL2,ITM2B,FGF9,ITGA6,PHACTR4,KIF3B,DCX,ETV6,CACNA1A,NBN	11
			Nervous System Development and Function	4.98E-02-1.19E-01	LMO4,ABL2,ITM2B,ITGA6,CHST10,IGFBP5,CAPRIN1,KIF3B,DCX,CACNA1A,NBN	11
			Cellular Assembly and Organization	2.74E-02-1.38E-01	HK2,ABL2,ITM2B,CAT,ITGA6,CAPRIN1,KIF3B,DCX,CACNA1A,NBN	10
			Cellular Growth and Proliferation	4.98E-02-1.28E-01	ABL2,FGF9,CAT,ITGA6,IGFBP5,CAPRIN1,MSI2,DCX,ETV6,NBN	10
			Tissue Morphology	2.74E-02-1.38E-01	LMO4,ABL2,ARID3B,FGF9,CAT,ITGA6,PHACTR4,DCX,NBN	9
			Small Molecule Biochemistry	4.98E-02-1.35E-01	HK2,ABL2,ITM2B,PCMT1,FGF9,CAT,SLC25A15,IGFBP5,CACNA1A	9
			Cell Morphology	4.98E-02-1.38E-01	HK2,ABL2,CAT,ITGA6,KIF3B,DCX,CACNA1A	7
			Cell-To-Cell Signaling and Interaction	4.98E-02-1.38E-01	ABL2,ITGA6,IGFBP5,CHST10,VAPB,CAPRIN1,CACNA1A	7
			Skeletal and Muscular System Development and Function	4.98E-02-1.19E-01	ABL2,LMO4,FGF9,GDF10,IGFBP5,FOSL2,CACNA1A	7
			Cellular Function and Maintenance	2.74E-02-1.36E-01	ABL2,CAT,ITGA6,DCX,ETV6,CACNA1A	6
			Molecular Transport	4.98E-02-1.35E-01	ABL2,FGF9,CAT,SLC25A15,CACNA1A	5
			Cellular Movement	4.98E-02-1.24E-01	FGF9,CAT,IGFBP5,DCX,ETV6	5
			DNA Replication, Recombination, and Repair	4.98E-02-1.19E-01	FGF9,CAT,IGFBP5,ETV6,NBN	5
			Nucleic Acid Metabolism	4.98E-02-1.09E-01	ABL2,PCMT1,CAT	3
miR-145 family	bta-miR-145	Temporal DE miRNA in IL	Cell Death and Survival	2.97E-02-1.05E-01	CAMK1D,ELAVL1,ABCA1,ATXN2,CASZ1,STAM,HIPK2,FRS2,TNFSF13B,ITPR2,MYRF,TPM3,OTX2,CLNK,NUAK1,RIMS1,ADCYAP1,ELMO1,PTGFR,ANGPT2,BACH2,NTN4,PLAGL1,SMAD5,APPL1,YES1,ARF6,GFRA1,DAB2,FLI1,GMFB,PPP3CA,CITED2,CELSR1,AP2B1,CACNA1D,NRAS,FLT1,ACTB,TRIM2,REV3L,KIF3A,EFNA1,SEMA3A,NR4A2,ADD3,KLF5,EBF3,SLC1A2,SOX9,NEDD9	51
			Cell Morphology	3.76E-02-1.05E-01	FLNB,PTGFR,ANGPT2,EPS15,BACH2,NTN4,PLAGL1,SMAD5,ITGB8,ELAVL1,ARF6,ABR,GFRA1,DAB2,SRGAP2,FLI1,CITED2,ZFYVE9,ABHD5,CAPZB,NRAS,CACNA1D,ITPR2,FLT1,CRKL,ACTB,TPM3,REV3L,KIF3A,OTX2,EFNA1,MYO5A,SEMA3A,ADD3,KLF5,SOX9,RIMS1,ADCYAP1,MAGI2,HLTF,NEDD9,ELMO1	42
			Cellular Movement	1.18E-02-1.04E-01	FLNB,ANGPT2,NTN4,CAMK1D,PLXNA2,ITGB8,ABCA1,APPL1,ARF6,ABR,SRGAP1,GFRA1,DAB2,HIPK2,FRS2,PPP3CA,CITED2,TNFSF13B,PIK3C2B,CACNA1D,NRAS,CRKL,FLT1,ACTB,MYRF,TPM3,EFNA1,SEMA3A,NR4A2,FSCN1,KLF5,ASAP2,EBF3,SLC1A2,RIMS1,MAGI2,ADCYAP1,NEDD9,ELMO1	39
			Tissue Morphology	1.9E-02-1.04E-01	ANGPT2,GLIS3,BACH2,ITGB8,SMAD5,ELAVL1,ABCA1,ATXN2,IPMK,GFRA1,DAB2,STAM,HIPK2,FLI1,FRS2,PPP3CA,TNFSF13B,CITED2,CELSR1,NRAS,FLT1,CRKL,TLL1,PLCL2,REV3L,KIF3A,OTX2,SEMA3A,ADD3,NR4A2,MBTD1,KLF5,RIMS1,SOX9,ADCYAP1,MAGI2,NEDD9,ELMO1,AP1G1	39
			Cellular Development	4.29E-02-1.05E-01	FLNB,ANGPT2,GLIS3,BACH2,BMP3,MPZL2,SMAD5,ITGB8,ELAVL1,ATXN2,ARF6,GFRA1,DAB2,FLI1,HIPK2,FRS2,PPP3CA,CITED2,TNFSF13B,MYO6,ABHD5,NRAS,FLT1,PLCL2,KIF3A,OTX2,EFNA1,MYO5A,SEMA3A,NR4A2,FSCN1,KLF5,SLC1A2,EBF3,SOX9,MAGI2,ADCYAP1	37
			Molecular Transport	4.6E-02-1.11E-01	PTGFR,ANGPT2,GLIS3,EPS15,SNX8,ABCA1,ATXN2,APPL1,HTR2C,KCNA4,ARF6,YES1,SPTLC2,GFRA1,PPP3CA,CITED2,MYO6,AP2B1,ABHD5,AGFG1,NRAS,CACNA1D,ITPR2,CHP1,MYO5A,ATP1B4,EXOC8,SLC1A2,RIMS1,SNX6,ADCYAP1,AP1G1	32
			Nervous System Development and Function	2.39E-02-1.04E-01	ANGPT2,SMAD5,PLXNA2,ITGB8,ATXN2,HTR2C,ARF6,IPMK,ABR,GFRA1,HIPK2,CITED2,PPP3CA,MYO6,CACNA1D,FLT1,KIF3A,OTX2,EFNA1,MYO5A,SEMA3A,NR4A2,SLC1A2,EBF3,SOX9,RIMS1,MAGI2,ADCYAP1,DLGAP1	29
			Cell Signaling	1.32E-02-1.04E-01	ANGPT2,HTR2C,ARF6,PLCE1,SRGAP1,GFRA1,DAB2,HIPK2,FRS2,GMFB,PPP3CA,ARHGAP6,NRAS,CACNA1D,FLT1,CRKL,CHP1,KIF3A,MDFIC,OTX2,EFNA1,CLNK,NR4A2,ASAP2,ADCYAP1,ELMO1	26
miR-146 family	bta-miR-146a	Temporal DE miRNA in MJ	Cellular Growth and Proliferation	1.11E-02-7.35E-02	ADORA3,STRN,NRAS,LRP2,HNRNPD,NAP1L1,IRAK1,WWP2,TRAF6,EIF4G2,ERBB4,SMAD4,NOTCH1	13
			Cellular Development	1.43E-02-7.35E-02	TRAF6,ADORA3,NRAS,EIF4G2,ERBB4,SMAD4,STRBP,LFNG,NAP1L1,NOTCH1,IRAK1,WWP2	12
			Cell Death and Survival	1.43E-02-7.26E-02	TRAF6,ADORA3,KLF7,NRAS,NOVA1,EIF4G2,LRP2,ERBB4,SMAD4,NOTCH1,IRAK1,WWP2	12
			Tissue Morphology	1.11E-02-7.53E-02	TRAF6,ADORA3,KLF7,NRAS,EIF4G2,LRP2,ERBB4,SMAD4,LFNG,NOTCH1,IRAK1	11
			Gene Expression	1.43E-02-6.12E-02	TRAF6,KLF7,NRAS,EIF4G2,ERBB4,SMAD4,LCOR,NAP1L1,NOTCH1,WWP2,IRAK1	11
			Cellular Function and Maintenance	1.43E-02-6.44E-02	TRAF6,ADORA3,NRAS,LRP2,ERBB4,SMAD4,HNRNPD,LFNG,NOTCH1,IRAK1	10
			Hematological System Development and Function	1.43E-02-7.35E-02	TRAF6,ADORA3,NRAS,SMAD4,HNRNPD,LFNG,NOTCH1,IRAK1,WWP2	9
			Tissue Development	1.43E-02-7.35E-02	TRAF6,NRAS,LRP2,ERBB4,SMAD4,STRBP,LFNG,NOTCH1	8
			Organ Development	1.43E-02-7.03E-02	TRAF6,ADORA3,ERBB4,SMAD4,STRBP,LFNG,NOTCH1	7
			Cellular Assembly and Organization	2.11E-02-5.76E-02	TRAF6,NRAS,LRP2,ERBB4,SMAD4,NOTCH1,IRAK1	7
			Connective Tissue Development and Function	1.43E-02-7.03E-02	TRAF6,NRAS,ERBB4,SMAD4,NOTCH1,IRAK1	6
			Cell-To-Cell Signaling and Interaction	1.43E-02-6.9E-02	TRAF6,ADORA3,NRAS,ERBB4,NOTCH1,IRAK1	6
			Cell Cycle	1.43E-02-6.9E-02	ADORA3,NRAS,EIF4G2,ERBB4,HNRNPD,NOTCH1	6
			Cellular Movement	1.11E-02-7.03E-02	KLF7,NRAS,ERBB4,SMAD4,NOTCH1	5
			Hematopoiesis	1.43E-02-7.35E-02	TRAF6,NRAS,SMAD4,LFNG,NOTCH1	5
			Skeletal and Muscular System Development and Function	1.79E-02-7.03E-02	TRAF6,NRAS,SMAD4,NOTCH1,IRAK1	5
			Lymphoid Tissue Structure and Development	1.43E-02-7.35E-02	TRAF6,NRAS,LFNG,NOTCH1	4
			Lipid Metabolism	1.43E-02-3.53E-02	TRAF6,ADORA3,NRAS,LRP2	4
			Molecular Transport	1.43E-02-6.76E-02	ADORA3,NRAS,LRP2,IRAK1	4
			Small Molecule Biochemistry	1.43E-02-6.76E-02	TRAF6,ADORA3,NRAS,LRP2	4
			Post-Translational Modification	1.79E-02-6.44E-02	TRAF6,NRAS,ERBB4,IRAK1	4
			Protein Synthesis	1.79E-02-6.12E-02	NRAS,EIF4G2,HNRNPD,NOTCH1	4
			Cell Signaling	2.2E-02-7.03E-02	TRAF6,ADORA3,ERBB4,IRAK1	4
			Cell-mediated Immune Response	1.55E-02-5.76E-02	TRAF6,LFNG,NOTCH1	3
miR-15/16 family	miR-15a	Negatively correlated with the density of Bifidobacterium species on D21 in IL	Cellular Growth and Proliferation	2.14E-02-1.25E-01	RAF1,DYRK1B,SGK1,PIK3R1,STYX,FBXW7,CDK5R1,PPM1D,GGA2,VEGFA,SESN1,CD2AP,DMTF1,EIF4G2,FGF18,GABARAPL1,HOXA10,MYT1L,HIPK2,TNFSF13B,PHIP,PAPPA,ZMYM2,LRP2,WEE1,TBP,PTPN3,TRIM35,PLAG1,CCDC19,NDP,CYLD,NOS1,RNF10,HTR4,FGF2,RECK,LRP6,RPS6KA3,CTDSPL,FNTA,E2F3,CDC42,CHEK1,PDCD4,DDX3X,USP3,TRADD,IGF1,BMPR1A,AKT3,PURA,FGF7,MAP2K1,MFN2,SLC12A6,HTR2A,HSPG2,SLC12A2,SMAD7,PRDM4,CASK,ARL3,SEMA3A,CCNE1,WNT3A,GHR,NF…	85
	miR-15b	Negatively correlated with the density of Bifidobacterium species on D21 in IL	Cell Death and Survival	3.92E-02-1.25E-01	RAF1,PEX13,SGK1,KIF1B,PIK3R1,EDA,FBXW7,CDK5R1,PPM1D,VEGFA,YWHAQ,ATXN2,EIF4G2,FGF18,BCL2L2,GFAP,HIPK2,TNFSF13B,EPHA7,SON,PHIP,UBE4B,ZMYM2,LRP2,WEE1,SNRK,TRIM35,NDP,CYLD,NOS1,PAFAH1B2,FGF2,RECK,LRP6,RPS6KA3,MYLK,MEOX2,CDC42,E2F3,FNTA,EIF2S1,SLC2A3,SMURF1,CHEK1,DDX3X,PDCD4,TRADD,IGF1,BMPR1A,PCMT1,AKT3,SORT1,FGF7,MAP2K1,MFN2,HTR2A,HSPG2,SLC12A2,SMAD7,SALL1,MAFK,RBCK1,SEMA3A,GNAI3,CCNE1,LAMP2,WNT3A,NF…	81
	miR-16a	Negatively correlated with the density of Bifidobacterium species on D21 in IL	Cellular Development	2.14E-02-1.25E-01	KIF23,RAF1,PIK3R1,FBXW7,CDK5R1,PPM1D,VEGFA,ATXN2,YWHAQ,FGF18,EIF4G2,HOXA10,GFAP,CCNT2,MYT1L,HIPK2,TNFSF13B,ZMYM2,SNRK,PLAG1,NDP,SPEN,CYLD,ELK4,NOS1,RNF10,HTR4,FGF2,RECK,LRP6,RPS6KA3,CTDSPL,ACVR2B,MEOX2,E2F3,CDC42,SMURF1,CHEK1,IGF1,BMPR1A,AKT3,SORT1,PURA,MAP2K1,FGF7,MFN2,HSPG2,SLC12A2,SMAD7,SALL1,MAFK,RELN,MYO5A,SEMA3A,CCNE1,WNT3A,GHR,NF1,LIMS1,E2F7,MYB,SKIL,PTH,ACVR2A,CARM1,AGO4	66
	miR-16b	Negatively correlated with the density of Bifidobacterium species on D21 in IL	Cell Morphology	2.99E-02-1.25E-01	KIF23,RAF1,PEX13,PIK3R1,STYX,FBXW7,CDK5R1,PPM1D,VEGFA,ENAH,CD2AP,HOXA10,GFAP,LRP2,FERMT2,FAT4,NDP,CYLD,NOS1,PAFAH1B2,LTBP2,FGF2,RECK,PRSS12,E2F3,DCLK1,CDC42,CHEK1,SMURF1,IGF1,SLC11A2,PVRL1,SORT1,PURA,FGF7,MFN2,HTR2A,HSPG2,SLC12A2,COL12A1,SMAD7,RELN,MYO5A,ZBTB46,LAMP2,WNT3A,GHR,NF1,MYB,TBPL1,BTRC,SKIL,PTH,ACVR2A,AGO4	55
			Cell Cycle	2.14E-02-1.25E-01	KIF23,RAF1,SGK1,IST1,FGF2,PIK3R1,LRP6,FBXW7,MEOX2,FNTA,DCLK1,CDC42,E2F3,CDK5R1,CHEK1,PPM1D,VEGFA,EIF4G2,DMTF1,IGF1,HOXA10,HIPK2,FGF7,MAP2K1,MFN2,TNFSF13B,PHIP,WEE1,SMAD7,PRDM4,PTPN3,TRIM35,ARL3,GNAI3,CCNE1,WNT3A,CACUL1,RAD9A,CUL2,LSM11,CDC14B,E2F7,MYB,APBB2,BTRC,SKIL,CYLD,SEPT2	48
			Tissue Development	2.14E-02-1.25E-01	KIF23,NOS1,RAF1,DYRK1B,HTR4,FGF2,PIK3R1,RECK,LRP6,MEOX2,ACVR2B,CDC42,SMURF1,VEGFA,IGF1,FGF18,BMPR1A,HOXA10,SLC11A2,HIPK2,MYT1L,MAP2K1,FGF7,HSPG2,SLC12A2,COL12A1,RELN,SEMA3A,WNT3A,NDP,NF1,MYB,TBPL1,SKIL,PTH,ACVR2A	36
			Nervous System Development and Function	4.37E-02-1.25E-01	KIF23,NOS1,RNF10,PEX13,HTR4,FGF2,KIF1B,LRP6,DCLK1,E2F3,CDC42,CDK5R1,ATXN2,VEGFA,IGF1,BMPR1A,FKRP,GFAP,SORT1,MYT1L,HIPK2,PURA,MAP2K1,HSPG2,LRP2,SLC12A2,RELN,PLAG1,MYO5A,SEMA3A,WNT3A,NF1,MYB,APBB2,SKIL	35
			Tissue Morphology	2.99E-02-1.25E-01	NOS1,RAF1,LTBP2,HTR4,FGF2,KIF1B,PIK3R1,PRSS12,DCLK1,CDK5R1,VEGFA,ATXN2,FGF18,IGF1,BMPR1A,HOXA10,SLC11A2,PVRL1,SORT1,PURA,HIPK2,MAP2K1,TNFSF13B,HSPG2,SLC12A2,COL12A1,RELN,SEMA3A,CCNE1,GHR,NF1,MYB,PTH	33
			Cellular Assembly and Organization	3.92E-02-1.25E-01	KIF23,LTBP2,FGF2,CDC42,DCLK1,SMURF1,VEGFA,ENAH,CD2AP,IGF1,AKT3,GFAP,PURA,HIPK2,FGF7,MFN2,ACTR2,LRP2,SLC12A2,RELN,FAT4,MYO5A,SEMA3A,LAMP2,WNT3A,NF1,PAG1,MYB,TBPL1,SKIL	30
			Skeletal and Muscular System Development and Function	2.99E-02-1.25E-01	NOS1,RAF1,DYRK1B,HTR4,FGF2,RECK,PRSS12,RPS6KA3,ACVR2B,CDC42,SMURF1,VEGFA,IGF1,FGF18,BMPR1A,HOXA10,MAP2K1,MFN2,COL12A1,SMAD7,SEMA3A,WNT3A,NF1,PTH,ACVR2A	25
			Cellular Movement	3.92E-02-1.25E-01	KIF23,RAF1,PEX13,IST1,FGF2,RECK,RELN,E2F3,DCLK1,CDC42,ARL3,CDK5R1,VEGFA,SEMA3A,NDP,WNT3A,IGF1,NF1,FKRP,AKT3,APBB2,SKIL,MAP2K1,SEPT2	24
			Connective Tissue Development and Function	4.37E-02-1.25E-01	HSPG2,RAF1,HTR4,FGF2,SLC12A2,COL12A1,RECK,RPS6KA3,E2F3,SMURF1,VEGFA,SEMA3A,WNT3A,GHR,FGF18,IGF1,BMPR1A,HOXA10,SKIL,PTH	20
			Hematological System Development and Function	4.7E-02-1.25E-01	RAF1,HTR4,ZMYM2,FGF2,PIK3R1,CDC42,MAFK,PPM1D,VEGFA,CCNE1,WNT3A,NF1,IGF1,HOXA10,MYB,PTH,HIPK2,ACVR2A,ELK4,TNFSF13B	20
			Hematopoiesis	4.7E-02-1.25E-01	RAF1,ZMYM2,HTR4,FGF2,PIK3R1,CDC42,MAFK,PPM1D,VEGFA,SEMA3A,IGF1,HOXA10,MYB,PTH,ACVR2A,ELK4,TNFSF13B	17
			DNA Replication, Recombination, and Repair	3.92E-02-1.25E-01	VEGFA,RAF1,CCNE1,IGF1,FGF2,SGK1,RAD9A,PIK3R1,TBPL1,PTH,MAP2K1,TNFSF13B,CHEK1	13
miR-191	bta-miR-191	Temporal DE miRNA in MJ	Cellular Development	1.24E-02-5.84E-02	PLCD1,SOX4,TJP1,SATB1,CDKN1B,TCF7L2	6
			Cellular Growth and Proliferation	1.24E-02-5.06E-02	PLCD1,SOX4,TJP1,SATB1,CDKN1B,TCF7L2	6
			Tissue Morphology	1.24E-02-4.85E-02	SOX4,TJP1,SATB1,HIP1,CDKN1B,TCF7L2	6
			Cell Morphology	1.24E-02-5.06E-02	SOX4,TJP1,HIP1,CDKN1B,TCF7L2	5
			Cellular Assembly and Organization	1.24E-02-6.04E-02	PLCD1,TJP1,SATB1,HIP1,CDKN1B	5
			Cell Death and Survival	1.24E-02-6.51E-02	PLCD1,SOX4,HIP1,CDKN1B,TCF7L2	5
			Cellular Function and Maintenance	1.24E-02-6.04E-02	SOX4,SATB1,CDKN1B,HIP1,TCF7L2	5
			Small Molecule Biochemistry	1.27E-02-5.6E-02	SOX4,PLCD1,HIP1,CDKN1B,TCF7L2	5
			Molecular Transport	1.44E-02-5.09E-02	PLCD1,SATB1,CDKN1B,HIP1,TCF7L2	5
			Gene Expression	1.49E-02-3.9E-02	SOX4,SATB1,CDKN1B,HIP1,TCF7L2	5
			Hematological System Development and Function	1.24E-02-5.84E-02	SOX4,SATB1,HIP1,CDKN1B	4
			Hematopoiesis	1.24E-02-5.84E-02	SOX4,SATB1,CDKN1B,HIP1	4
			Lymphoid Tissue Structure and Development	1.24E-02-5.84E-02	SOX4,SATB1,HIP1,CDKN1B	4
			Lipid Metabolism	1.27E-02-5.09E-02	PLCD1,HIP1,CDKN1B,TCF7L2	4
			Tissue Development	1.32E-02-3.48E-02	SOX4,TJP1,CDKN1B,TCF7L2	4
			Cell Cycle	1.24E-02-3.85E-02	SATB1,CDKN1B,TCF7L2	3
			Cell-To-Cell Signaling and Interaction	1.24E-02-3.48E-02	PLCD1,TJP1,CDKN1B	3
			Nervous System Development and Function	1.24E-02-4.78E-02	SOX4,CDKN1B,TCF7L2	3
			Cell Signaling	1.24E-02-3.83E-02	PLCD1,CDKN1B,HIP1	3
			Cell-mediated Immune Response	1.24E-02-5.84E-02	SOX4,SATB1,CDKN1B	3
			Connective Tissue Development and Function	1.32E-02-5.06E-02	TJP1,CDKN1B,TCF7L2	3
			Protein Synthesis	1.44E-02-5.4E-02	SOX4,SATB1,CDKN1B	3
			Cellular Movement	1.49E-02-4.57E-02	PLCD1,TJP1,CDKN1B	3
			Organ Morphology	1.58E-02-5.06E-02	HIP1,CDKN1B,TCF7L2	3
			Post-Translational Modification	2.1E-02-3.34E-02	OXSR1,HIP1,CDKN1B	3
miR-192/215 family	bta-miR-215	Temporal DE miRNA in MJ; Regional DE miRNA (RU vs IL; RU vs MJ)	Tissue Morphology	1.77E-02-7.47E-02	DCBLD2,TDG,ZEB2,PRKAR1A	4
	bta-miR-192	Regional DE miRNA (RU vs IL; RU vs MJ)	Cellular Development	1.9E-02-1.06E-01	HS6ST1,ZEB2,CCNT2,PRKAR1A	4
			Cellular Assembly and Organization	4.43E-02-1.06E-01	LPAR4,RAB2A,ARFGEF1,PRKAR1A	4
			Small Molecule Biochemistry	1.77E-02-5.03E-02	TDG,HS6ST1,RRM1	3
			Tissue Development	1.9E-02-7.6E-02	LPAR4,ZEB2,PRKAR1A	3
miR-194 family	bta-miR-194	Regional DE miRNA (RU vs IL; RU vs MJ)	Gene Expression	4.9E-02-7.94E-02	ZFYVE9,SETD8,EIF4EBP2,FOXA1,FMR1,FBXW7,SALL1,ACVR2B,BCLAF1,CXCL3,PAX7,NFAT5,TAF4,TRPS1,CHD1,KHDRBS2	16
			Cell Death and Survival	4.9E-02-1.17E-01	SETD8,PHLDA1,LUC7L3,FBXW7,SALL1,HBEGF,ACVR2B,BCLAF1,CXCL3,BNIP2,PAX7,NFAT5,TAF4,THBS1,TRPS1,MLKL	16
			Cellular Development	4.9E-02-1.14E-01	BNIP2,CXCL3,PAX7,FOXA1,THBS1,FMR1,TRPS1,SALL1,FBXW7,HBEGF,ACVR2B	11
			Tissue Development	4.9E-02-1.17E-01	SETD8,CXCL3,PAX7,THBS1,FOXA1,FMR1,FBXW7,SALL1,HBEGF,ACVR2B	10
			Cell Morphology	4.9E-02-1.03E-01	ZFYVE9,NFAT5,TSPAN7,THBS1,FMR1,FBXW7,HBEGF,DIRAS2	8
			Cellular Movement	4.9E-02-1.17E-01	SETD8,CXCL3,NFAT5,FOXA1,THBS1,CHD1,FBXW7,HBEGF	8
			Cellular Assembly and Organization	4.9E-02-1.17E-01	ZFYVE9,SYT4,BNIP2,FOXA1,THBS1,FMR1,FBXW7,CHD1	8
			Small Molecule Biochemistry	4.9E-02-1.14E-01	CXCL3,SYT4,FOXA1,THBS1,FMR1,AQP8,GOT2,OSBPL8	8
			Cell Cycle	4.9E-02-1.14E-01	SETD8,PAX7,THBS1,FOXA1,FBXW7,CHD1,HBEGF	7
			Tissue Morphology	4.9E-02-1.01E-01	PAX7,FOXA1,THBS1,HBEGF,FBXW7,SALL1,ACVR2B	7
			Cell-To-Cell Signaling and Interaction	4.9E-02-1.17E-01	CXCL3,SYT4,EIF4EBP2,THBS1,FMR1,HBEGF	6
			Skeletal and Muscular System Development and Function	4.9E-02-1.08E-01	BNIP2,PAX7,NFAT5,THBS1,HBEGF,ACVR2B	6
			Cellular Growth and Proliferation	4.9E-02-1.14E-01	PHLDA1,CXCL3,PAX7,THBS1,FMR1,HBEGF	6
			Molecular Transport	4.9E-02-1.14E-01	CXCL3,SYT4,FOXA1,THBS1,FMR1,AQP8	6
			Nervous System Development and Function	4.9E-02-1.17E-01	BNIP2,CXCL3,PAX7,FOXA1,FMR1,SALL1	6
			Digestive System Development and Function	4.9E-02-1.14E-01	THBS1,TRPS1,HBEGF,AQP8,ACVR2B	5
			Cellular Function and Maintenance	4.9E-02-1.17E-01	CXCL3,SYT4,BNIP2,THBS1,FMR1	5
			Organ Development	4.9E-02-9.32E-02	PAX7,THBS1,SALL1,HBEGF,ACVR2B	5
			Lipid Metabolism	4.9E-02-1.14E-01	THBS1,FOXA1,AQP8,OSBPL8	4
			Immune Cell Trafficking	4.9E-02-1.17E-01	CXCL3,THBS1,HBEGF	3
miR-196 family	bta-miR-196a	Regional DE miRNA (RU vs IL; IL vs MJ); Temporal DE miRNA in IL; positively correlated with the density of both Bifidobacterium and Lactobacillus species on D21	Gene Expression	1.68E-03-9.97E-02	TOX3,PAK2,NRAS,MAP3K1,IGF2BP3,NR2C2,HAND1,CASK,HOXA9,ZMYND11,HMGA2,HOXB7,HOXA5,HOXC8,HOXA7,GATA6,TRERF1,SUDS3	18
	bta-miR-196b	Regional DE miRNA (RU vs IL; IL vs MJ); Temporal DE miRNA in IL; positively correlated with the density of both Bifidobacterium and Lactobacillus species on D21	Cell Death and Survival	2.64E-02-1.02E-01	CREBL2,MID2,NRAS,PAK2,NTN4,MAP3K1,NR2C2,CCDC47,HMGA2,HOXA9,ZMYND11,HOXA5,HOXA7,GATA6,SUDS3,PPP1R15B	16
			Tissue Development	1.12E-05-1.06E-01	PAK2,NRAS,NTN4,MAP3K1,HAND1,HOXB8,CASK,HMGA2,HOXB7,HOXA5,HOXC8,HOXB6,GATA6,HOXA7	14
			Cellular Development	1.68E-03-1.06E-01	PAK2,NRAS,HOXB7,HOXA5,HOXC8,HOXB6,HOXA7,HAND1,GATA6,HOXB8,CASK,HOXA9,HMGA2	13
			Skeletal and Muscular System Development and Function	1.12E-05-8.44E-02	NRAS,PAK2,HOXB7,HOXA5,HOXC8,HOXB6,GATA6,HOXA7,HAND1,HOXB8,HOXA9,HMGA2	12
			Connective Tissue Development and Function	1.12E-05-7.83E-02	PAK2,NRAS,HOXB7,HOXA5,HOXC8,HOXB6,GATA6,NR2C2,HOXA7,HOXB8,HOXA9	11
			Hematological System Development and Function	1.21E-02-1.02E-01	NRAS,HOXB7,HOXA5,HOXB6,NR2C2,GATA6,HOXA7,HOXB8,PPP1R15B,HOXA9	10
			Hematopoiesis	1.21E-02-1.02E-01	NRAS,HOXB7,HOXA5,HOXB6,NR2C2,GATA6,HOXA7,HOXB8,PPP1R15B,HOXA9	10
			Cell Morphology	1.63E-02-9.97E-02	NRAS,PAK2,NTN4,HOXA5,MAP3K1,HOXA7,HOXB8,HOXA9,PPP1R15B,HMGA2	10
			Cellular Growth and Proliferation	2.64E-02-1.06E-01	PTPRG,PAK2,NRAS,HOXB7,HOXA5,MAP3K1,GATA6,CASK,HOXA9,HMGA2	10
			Cell Cycle	2.64E-02-9.97E-02	PAK2,NRAS,MAP3K1,GATA6,HOXA7,RIOK3,SUDS3,HMGA2	8
			Cellular Assembly and Organization	2.64E-02-9.97E-02	PAK2,NRAS,MAP3K1,HOXA7,RIOK3,CASK,SUDS3,HMGA2	8
			Organ Development	1.12E-05-6.76E-02	HOXB7,HOXA5,HOXC8,HOXB6,HOXA7,HOXB8,HMGA2	7
			Cellular Function and Maintenance	2.64E-02-9.97E-02	YOD1,PAK2,NRAS,NTN4,CCDC47,PPP1R15B,HMGA2	7
			Molecular Transport	3.43E-02-9.97E-02	GLTP,NRAS,HOXA5,LRP1B,NR2C2,CASK,ABCB9	7
			Cellular Movement	3.43E-02-1.02E-01	NRAS,MAP3K1,HOXA7,HAND1,GATA6,HOXA9	6
			DNA Replication, Recombination, and Repair	3.43E-02-1.02E-01	NRAS,NR2C2,HOXA7,RIOK3,SUDS3,HMGA2	6
			Small Molecule Biochemistry	2.64E-02-8.06E-02	GLTP,NRAS,HOXA5,NR2C2,TRERF1	5
			Cellular Compromise	2.64E-02-7.15E-02	YOD1,NRAS,CCDC47,PPP1R15B	4
			Protein Synthesis	4.17E-02-7.83E-02	NRAS,PAK2,HOXA5,MAP3K1	4
			Protein Trafficking	3.43E-02-8.28E-02	LRP1B,CASK,ABCB9	3
			Post-Translational Modification	4.17E-02-9.97E-02	NRAS,PAK2,MAP3K1	3
miR-211 family	bta-miR-211	Temporal DE miRNA in MJ and IL	Cell Death and Survival	3.75E-02-1.54E-01	DPF1,JPH3,EPHB2,VAPA,ZFP36L1,BIN1,TCF12,EPHB6,DCUN1D3,SIX1,ANXA11,BMPR1A,RUNX2,RHOT1,EZR,CCT5,AAK1,EEF1E1,ACSL4,BCL2L2,SORT1,PDCD6IP,FRS2,LATS1,TFEC,DNM2,EPHA7,SETD8,NOVA1,ANGPT1,GRM1,LRP2,HSPH1,SOX11,SSRP1,IGF2R,FOXC1,ATF2,ZNF423,NTRK2,ABL2,PPARGC1A,PHOX2B	43
			Cellular Development	3.75E-02-1.56E-01	ZBTB7A,GLIS3,CAMK1,EPHB2,HNRNPA2B1,BIN1,TCF12,EPHB6,SIX1,RUNX2,BMPR1A,EZR,SORT1,FRS2,LATS1,ANGPT1,ZNF521,RRM2,SOX11,FOXC1,IGF2R,ATF2,SH3PXD2A,ZNF423,NTRK2,ABL2,HOXC8,SOCS7,PPARGC1A,PHOX2B	30
			Hematological System Development and Function	4.3E-02-2.73E-01	CTNNBIP1,SGPL1,DTX1,RUNX2,JARID2,WNT4,IL23A,SOX4,CDK13,ATG7,EPHA1,IL6R,SMARCA5,ZEB1,CDC42,NR3C1,BCL2,TCF12,DMTF1,SHC1,OGT,RC3H1,CBFA2T3,BCL11A,NFIA,TNFRSF8,NRARP,SIRT1	28
			Cellular Function and Maintenance	3.75E-02-1.56E-01	EPHB2,BIN1,AP2A2,RAB22A,HOOK3,TPPP,RUNX2,RHOT1,EZR,CHN2,SORT1,PDCD6IP,DNM2,TTYH1,ANGPT1,LRP2,GRM1,IGF2R,FOXC1,SSRP1,ATF2,EPB41L5,NTRK2,ABL2,EPHA5,TCHH,PPARGC1A	27
			Hematopoiesis	4.3E-02-3.73E-01	CTNNBIP1,SGPL1,DTX1,RUNX2,JARID2,WNT4,IL23A,SOX4,CDK13,ATG7,EPHA1,IL6R,SMARCA5,ZEB1,CDC42,NR3C1,SHC1,OGT,RC3H1,CBFA2T3,BCL11A,NFIA,TNFRSF8,NRARP,SIRT1	25
			Cell Morphology	3.75E-02-1.54E-01	ANGPT1,RIMS2,EPHB2,GRM1,SC5D,ATF2,MGAT3,NTRK2,ABL2,RUNX2,PRRX1,EZR,EFNB3,PDCD6IP,ALPL,DNM2,PPARGC1A	17
			Cellular Movement	3.75E-02-1.54E-01	RIMS2,ANGPT1,EPHB2,RRM2,IGF2R,SSRP1,SIX1,NTRK2,ABL2,RUNX2,EZR,PRRX1,EFNB3,FRS2,DNM2	15
			Cell-To-Cell Signaling and Interaction	3.75E-02-1.54E-01	NTRK2,ANGPT1,ABL2,GRM1,RUNX2,EPHB2,EPHA5,PDCD6IP,DNM2,PPARGC1A,ATF2,PHOX2B	12
			Cell Signaling	3.75E-02-1.54E-01	EPHB6,GRPR,PTPRD,ANGPT1,GRM1,RUNX2,EPHB2,PRRX1,FRS2	9
			Cell Cycle	3.75E-02-1.41E-01	SETD8,ANGPT1,RUNX2,SSRP1,LATS1,ATF2	6
			Inflammatory Response	4.55E-02-3.65E-01	NFATC3,IL6R,NQO1,PIK3CD,BCL11B,TNF	6
			Immune Cell Trafficking	4.97E-02-4.73E-01	NFATC3,IL6R,PIK3CD,BCL11B,TNF	5
miR-205 family	bta-miR-205	Regional DE miRNA (RU vs IL; IL vs MJ; RU vs IL)	Cellular Growth and Proliferation	3.81E-02-1.15E-01	TNFAIP8,PTX3,ENPEP,PHC2,CLTC,LRRK2,ERBB3,PTPRM,FRK,NOX1,TBX18,INHBA,CADM1,NEU1,SCD5,ERBB4,TGFA,SSBP3,LRP1	19
			Small Molecule Biochemistry	3.81E-02-1.15E-01	ENPEP,SLC35A1,ERBB3,ETNK1,RIC8A,INHBA,NOX1,CADM1,NCEH1,SCD5,PDE3B,ERBB4,TGFA,PLCB1,LRP1	15
			Cellular Movement	3.81E-02-1.15E-01	PTX3,LRRK2,ERBB3,RIC8A,FRK,PTPRM,TBX18,INHBA,NOX1,SERPINB2,CADM1,NEU1,ERBB4,TGFA,LRP1	15
			Cellular Function and Maintenance	1.33E-02-1.15E-01	PTX3,ABI2,CLTC,LRRK2,ERBB3,TBX18,INHBA,CADM1,EPB41,NSF,CENPE,ERBB4,TESK2,LRP1	14
			Cell-To-Cell Signaling and Interaction	3.51E-02-1.15E-01	PTX3,ERBB3,RIC8A,INHBA,CADM1,NEU1,NSF,ERBB4,TGFA,PLCB1,TESK2,HS3ST1,LRP1	13
			Cellular Development	2.77E-02-1.15E-01	TNFAIP8,SCD5,PHC2,ERBB4,TGFA,LRRK2,ERBB3,LRP1,TBX18,INHBA,NOX1,CADM1	12
			Molecular Transport	3.81E-02-1.15E-01	NCEH1,SLC35A1,NSF,MGRN1,PDE3B,ERBB4,TGFA,ERBB3,NOX1,INHBA,LRP1,CADM1	12
			Cell Morphology	3.81E-02-1.12E-01	NSF,EPB41,SCD5,ERBB4,TGFA,LRRK2,ERBB3,FRK,NOX1,LRP1,INHBA,CADM1	12
			Cellular Assembly and Organization	3.81E-02-1.15E-01	ABI2,NSF,EPB41,SCD5,CENPE,ERBB4,CLTC,LRRK2,TESK2,FRK,INHBA,LRP1	12
			Lipid Metabolism	3.81E-02-1.09E-01	NCEH1,SCD5,PDE3B,ERBB4,TGFA,PLCB1,ETNK1,NOX1,INHBA,LRP1,CADM1	11
			Nervous System Development and Function	3.81E-02-1.12E-01	SCD5,ERBB4,CLTC,TGFA,LRRK2,PLCB1,ERBB3,FRK,INHBA,LRP1,CADM1	11
			Post-Translational Modification	3.81E-02-8.65E-02	PPP3R2,NCEH1,EPB41,MGRN1,CENPE,TGFA,LRRK2,DUSP7,PTPRM,LRP1	10
			Cell Death and Survival	3.81E-02-1.09E-01	PTX3,ERBB4,TGFA,LRRK2,ERBB3,LRP1,INHBA,NOX1,CADM1,SERPINB2	10
			Connective Tissue Development and Function	4.46E-02-1.12E-01	TNFAIP8,PHC2,CENPE,ERBB4,CLTC,TGFA,ERBB3,INHBA,NOX1,LRP1	10
			Cell Cycle	2.74E-02-1.12E-01	PTX3,PHC2,CENPE,ERBB4,CLTC,TGFA,ERBB3,INHBA	8
			Cell Signaling	4.22E-02-1.09E-01	CENPE,PDE3B,ERBB4,TGFA,LRRK2,PLCB1,ERBB3,LRP1	8
			Tissue Morphology	3.81E-02-1.12E-01	EPB41,PHC2,ERBB4,TGFA,ERBB3,INHBA,CADM1	7
			Cellular Compromise	3.81E-02-7.46E-02	PTX3,EPB41,CENPE,LRRK2,ERBB3,CADM1	6
			Gene Expression	3.81E-02-1.12E-01	SBF2,ERBB4,TGFA,PLCB1,FRK,INHBA	6
			Hematological System Development and Function	3.81E-02-1.15E-01	PTX3,EPB41,LRRK2,ERBB3,INHBA,SERPINB2	6
			DNA Replication, Recombination, and Repair	4.22E-02-1.06E-01	PDE3B,CENPE,ERBB4,TGFA,ERBB3,INHBA	6
			Organ Development	3.81E-02-9E-02	ERBB4,TGFA,ERBB3,INHBA,CADM1	5
			Nucleic Acid Metabolism	4.22E-02-1.12E-01	SLC35A1,PDE3B,RIC8A,INHBA	4
			Hematopoiesis	3.81E-02-9.75E-02	PTX3,EPB41,INHBA	3
			Digestive System Development and Function	4.22E-02-1.01E-01	PHC2,ERBB3,INHBA	3
			Organ Morphology	4.22E-02-1.06E-01	TGFA,ERBB3,CADM1	3
miR-24 family	bta-miR-24-3p	Temporal DE miRNA in MJ	Cellular Growth and Proliferation	2.08E-02-8.86E-02	SMAD2,FMR1,GATA3	3
			Tissue Development	2.08E-02-6.47E-02	SMAD2,FMR1,GATA3	3
			Cell-To-Cell Signaling and Interaction	2.08E-02-8.86E-02	SMAD2,FMR1,GATA3	3
			Cellular Assembly and Organization	2.08E-02-5.31E-02	FMR1,GATA3,SASS6	3
			Cellular Function and Maintenance	2.08E-02-8.16E-02	SMAD2,FMR1,GATA3	3
			Nervous System Development and Function	2.08E-02-7.36E-02	FMR1,GPHN,GATA3	3
			Cell Morphology	3.81E-02-7.36E-02	FMR1,GPHN,GATA3	3
			Tissue Morphology	3.81E-02-7.36E-02	SMAD2,GPHN,GATA3	3
miR-29 family	bta-miR-29c	Positively correlated with the density of both Bifidobacterium and Lactobacillus species on D42	Cellular Development	1.09E-02-1.51E-02	DYNLT1,RALA,ERCC6,WWTR1,HBP1,VEGFA,DNMT3B,DRD1,IGF1,CYP19A1,PHF14,AKT3,TET2,MYBL2,ELN,ABHD5,COL4A1,DOT1L,ITGA6,ADAMTS9,SH3PXD2A,SUV420H2,RRAS2,E2F7,MSTN,SPARC,FGA	27
	bta-miR-29b	Positively correlated with the density of both Bifidobacterium and Lactobacillus species on D42	Cellular Assembly and Organization	1.09E-02-1.51E-02	DYNLT1,RALA,MAP6,DPYSL5,HBP1,BAK1,METAP2,DNMT3B,VEGFA,HOOK3,IGF1,DRD1,PAG1,FGD4,SPARC,AKT3,FGA,COL3A1	18
			Cellular Function and Maintenance	1.09E-02-1.51E-02	DYNLT1,ERCC6,COL4A1,RALA,MAP6,HBP1,DPYSL5,BAK1,VEGFA,IGF1,DRD1,GPR37,FGD4,MSTN,FGA,MOG,COL3A1	17
			Connective Tissue Development and Function	1.09E-02-1.51E-02	ELN,ADAMTS7,ERCC6,WWTR1,COL4A3,METAP2,VEGFA,DNMT3B,COL1A1,SUV420H2,IGF1,CYP19A1,PHF14,MSTN,SPARC,MYBL2	16
			Cell Morphology	1.09E-02-1.51E-02	DYNLT1,COL4A1,RALA,ITGA6,DPYSL5,BAK1,RABGEF1,VEGFA,RRAS2,DRD1,IGF1,LPL,SPARC,AKT3,MYBL2,COL3A1	16
			Cellular Growth and Proliferation	1.09E-02-1.51E-02	ELN,ADAMTS7,ERCC6,NID2,ITGA6,METAP2,VEGFA,SUV420H2,IGF1,PHF14,AKT3,SPARC,MSTN,MYBL2,MOG	15
			Cell-To-Cell Signaling and Interaction	1.09E-02-1.51E-02	ELN,ITGA6,BAK1,METAP2,VEGFA,COL1A1,FSTL1,IGF1,AKT3,MSTN,SPARC,MYBL2,FGA,IL1RAP,MOG	15
			Tissue Development	1.09E-02-1.51E-02	ELN,DYNLT1,COL4A1,RALA,DOT1L,ITGA6,VEGFA,COL1A1,RRAS2,IGF1,DRD1,MYBL2,FGA,MOG	14
			Cellular Movement	1.09E-02-1.51E-02	ELN,COL4A1,SH3PXD2A,VEGFA,FSTL1,COL1A1,RRAS2,IGF1,CYP19A1,AKT3,SPARC,MAP4K4,MOG	13
			Hematological System Development and Function	1.09E-02-1.51E-02	VEGFA,COL1A1,FSTL1,COL4A1,IGF1,CYP19A1,AKT3,FGA,IL1RAP,BAK1,MOG	11
			Cell Cycle	1.09E-02-1.51E-02	DNMT3B,VEGFA,COL1A1,ERCC6,SUV420H2,IGF1,WWTR1,E2F7,DOT1L,MYBL2,METAP2	11
			Tissue Morphology	1.09E-02-1.51E-02	DNMT3B,VEGFA,COL1A1,IGF1,CYP19A1,COL4A3,LPL,ITGA6,SPARC,RABGEF1	10
			Nervous System Development and Function	1.09E-02-1.51E-02	VEGFA,AP2B1,DYNLT1,RALA,RRAS2,DRD1,IGF1,ITGA6,FGA	9
			Cellular Compromise	1.09E-02-1.42E-02	DNMT3B,CFL2,IGF1,GPR37,SPARC,SGCB,REV3L,BAK1,COL3A1	9
			Immune Cell Trafficking	1.09E-02-1.51E-02	VEGFA,COL1A1,COL4A1,IGF1,CYP19A1,FGA,BAK1,MOG	8
			Cell Death and Survival	1.09E-02-1.51E-02	VEGFA,AP2B1,IGF1,DOT1L,SPARC,MOG,BAK1,METAP2	8
			DNA Replication, Recombination, and Repair	1.09E-02-1.32E-02	DNMT3B,VEGFA,IGF1,AKT3,REV3L,METAP2	6
			Skeletal and Muscular System Development and Function	1.09E-02-1.51E-02	VEGFA,ELN,IGF1,WWTR1,ITGA6,MSTN	6
			Lipid Metabolism	1.09E-02-1.42E-02	VEGFA,ABHD5,DRD1,IGF1,CYP19A1,SLC22A7	6
			Molecular Transport	1.09E-02-1.42E-02	RALA,DRD1,IGF1,CYP19A1,AKT3,SLC22A7	6
			Small Molecule Biochemistry	1.09E-02-1.51E-02	VEGFA,ABHD5,DRD1,IGF1,CYP19A1,SLC22A7	6
miR-31 family	bta-miR-31	Regional DE miRNA (RU vs MJ; RU vs IL)	Gene Expression	4.28E-02-1.42E-01	JAZF1,ARID1A,EIF4EBP2,ADCY6,CREG1,DMD,SATB2,POU2F1,TAF4,KHDRBS3,EIF5,DAB2,MYF5,PRKCE,APBB2,NR5A2,PPP2R5C,MAP4K5,RET,RASA1,E2F2,MSN	22
			Tissue Morphology	1.94E-02-1.42E-01	ARID1A,TBXA2R,NUMB,ALKBH1,SATB2,SH2D1A,POU2F1,TAF4,PRKCE,APBB2,MYF5,TFRC,NR5A2,DAB2,RET,RASA1,E2F2	17
miR-33 family	bta-miR-33b	Temporal DE miRNA in MJ	Cellular Growth and Proliferation	2.84E-02-8.84E-02	ARID5B,RECK,XBP1,CDK6,TPM3,UBE2V2,HMGA2,SPAST,ZMIZ1,SEMA3A,PIM1,SIRT6,PDGFRA,HIPK2,HMGCR,BRIP1,ADCYAP1	17
			Cell Death and Survival	2.84E-02-8.56E-02	RECK,CDK6,XBP1,TPM3,UBE2V2,HMGA2,ABCA1,ATP8B1,NSF,SEMA3A,ATP11C,PIM1,SIRT6,PDGFRA,HIPK2,HMGCR,ADCYAP1	17
			Tissue Morphology	2.84E-02-9.12E-02	ARID5B,RECK,XBP1,CDK6,HMGA2,ABCA1,ZMIZ1,SATB2,SEMA3A,PIM1,SIRT6,PDGFRA,SIM2,ADCYAP1,HMGCR,HIPK2	16
			Cellular Development	1.51E-02-8.84E-02	RAP2A,ARID5B,RECK,XBP1,CDK6,TPM3,HMGA2,SPAST,SEMA3A,PIM1,SIRT6,PDGFRA,ADCYAP1,HIPK2,HMGCR	15
			Tissue Development	2.84E-02-8.84E-02	ARID5B,RAP2A,RECK,CDK6,XBP1,UBE2V2,HMGA2,SEMA3A,NSF,SATB2,PIM1,PDGFRA,ADCYAP1,HMGCR,HIPK2	15
			Gene Expression	2.84E-02-7.74E-02	RAP2A,ARID5B,ZNF281,YWHAH,XBP1,ZMIZ1,HMGA2,BACH1,ATP8B1,SATB2,SIM2,ADCYAP1,HIPK2,BRIP1	14
			Cellular Assembly and Organization	2.84E-02-8.56E-02	NSF,SEMA3A,RAP2A,PIM1,RECK,PALM2-AKAP2,PDGFRA,XBP1,UBE2V2,TPM3,ADCYAP1,HIPK2,ABCA1,SPAST	14
			Cell Morphology	2.84E-02-9.12E-02	RAP2A,RECK,XBP1,CDK6,TPM3,HMGA2,SLC12A5,SPAST,NSF,SEMA3A,PIM1,PDGFRA,ADCYAP1	13
			Cellular Function and Maintenance	2.84E-02-8.56E-02	RAP2A,XBP1,TPM3,UBE2V2,HMGA2,ABCA1,SPAST,SEMA3A,NSF,PALM2-AKAP2,PDGFRA,ADCYAP1,HIPK2	13
			Molecular Transport	2.84E-02-9.12E-02	NSF,KPNA4,CPT1A,YWHAH,PDGFRA,XBP1,HMGCR,ADCYAP1,SLC12A5,ABCA1,SCN8A,ATP8B1	12
			Hematological System Development and Function	2.84E-02-9.12E-02	ARID5B,SEMA3A,PIM1,SIRT6,CDK6,XBP1,PDGFRA,HMGCR,HIPK2,ADCYAP1,ABCA1	11
			Small Molecule Biochemistry	2.84E-02-9.12E-02	NSF,CPT1A,YWHAH,PI4K2A,XBP1,PDGFRA,ADCYAP1,HMGCR,ABCA1,ATP8B1	10
			Cell-To-Cell Signaling and Interaction	2.84E-02-8.84E-02	SEMA3A,NSF,CDK6,XBP1,UBE2V2,HIPK2,ADCYAP1,SLC12A5,ABCA1,SCN8A	10
			Nervous System Development and Function	2.84E-02-8.84E-02	RAP2A,SEMA3A,PDGFRA,CDK6,UBE2V2,ADCYAP1,HIPK2,SPAST,SLC12A5,SCN8A	10
			Lipid Metabolism	2.84E-02-9.12E-02	CPT1A,YWHAH,PI4K2A,XBP1,PDGFRA,ADCYAP1,HMGCR,ABCA1,ATP8B1	9
			Connective Tissue Development and Function	2.84E-02-8.41E-02	RAP2A,ARID5B,SATB2,RECK,CDK6,PDGFRA,TPM3,HIPK2,ABCA1	9
			Hematopoiesis	3.65E-02-9.12E-02	SEMA3A,ARID5B,PIM1,SIRT6,PDGFRA,XBP1,CDK6,ADCYAP1,HIPK2	9
			Organ Development	2.84E-02-8.56E-02	ARID5B,SATB2,RECK,XBP1,SIM2,PDGFRA,HMGCR,HMGA2	8
			Skeletal and Muscular System Development and Function	2.84E-02-8.56E-02	SEMA3A,ARID5B,SATB2,PIM1,RECK,PDGFRA,HMGCR,HMGA2	8
			Digestive System Development and Function	2.84E-02-7.43E-02	ARID5B,SATB2,CPT1A,SIRT6,PDGFRA,XBP1,SIM2	7
			Cell Cycle	2.84E-02-8.84E-02	PIM1,SIRT6,CDK6,PDGFRA,HIPK2,ADCYAP1,HMGA2	7
			Protein Synthesis	4.73E-02-8.38E-02	CPT1A,PALM2-AKAP2,HMGCR,ADCYAP1,ABCA1,SPAST	6
			Lymphoid Tissue Structure and Development	2.84E-02-7.07E-02	ARID5B,PIM1,SIRT6,CDK6,XBP1	5
			Cellular Compromise	2.84E-02-8.56E-02	PI4K2A,PIM1,XBP1,HIPK2,SPAST	5
			Nucleic Acid Metabolism	2.84E-02-7.74E-02	NSF,CPT1A,ADCYAP1,HMGCR	4
			Humoral Immune Response	2.84E-02-7.48E-02	ARID5B,PIM1,XBP1	3
miR-362 family	bta-miR-362-5p	Temporal DE miRNA in MJ	Cell Death and Survival	1.97E-02-1.04E-01	SEMA3A,PLAGL2,DDX58,DAZ1/DAZ4,DAZ2	5
			Tissue Morphology	4.82E-02-1.07E-01	SEMA3A,DDX58,DAZ1/DAZ4,DAZ2,NHLH1	5
			Cell-To-Cell Signaling and Interaction	1.97E-02-8.04E-02	SEMA3A,PTPRE,PLAGL2,DDX58	4
			Connective Tissue Development and Function	1.97E-02-8.04E-02	SEMA3A,PTPRE,DDX58,PLAGL2	4
			Cellular Development	2.36E-02-8.71E-02	SEMA3A,PTPRE,SSX2IP	3
			Cellular Growth and Proliferation	2.36E-02-8.04E-02	SEMA3A,PLAGL2,SSX2IP	3
			Cell Morphology	3.66E-02-9.57E-02	SEMA3A,PTPRE,DDX58	3
miR-378 family	bta-miR-378b	Temporal DE miRNA in IL	Cell Morphology	3.75E-02-1.07E-01	NEUROD1,PLEKHG2,PARVA,CBL,EFNA5,RFX5,FOXG1	7
	bta-miR-378c	Temporal DE miRNA in MJ	Tissue Development	3.24E-02-1.24E-01	NEUROD1,SOX7,TOB2,CBL,EFNA5,FOXG1	6
			Cellular Development	3.24E-02-1.26E-01	NEUROD1,TOB2,CBL,EFNA5,FOXG1	5
			Cell-To-Cell Signaling and Interaction	3.75E-02-7.61E-02	NEUROD1,CBL,EFNA5,GPM6B,RFX5	5
			Cellular Assembly and Organization	3.24E-02-1.04E-01	NEUROD1,CBL,SAR1A,EFNA5	4
			Cellular Function and Maintenance	3.24E-02-1.04E-01	NEUROD1,CBL,EFNA5,FOXG1	4
			Cellular Growth and Proliferation	3.24E-02-9.34E-02	NEUROD1,TOB2,CBL,FOXG1	4
			Tissue Morphology	3.24E-02-1.11E-01	NEUROD1,CBL,DACT1,DDAH1	4
			Cellular Movement	3.75E-02-1.14E-01	NEUROD1,TSPAN3,PARVA,CBL	4
			Digestive System Development and Function	3.75E-02-1.14E-01	NEUROD1,EFNA5,DACT1,RFX5	4
			Organ Morphology	3.75E-02-1.04E-01	NEUROD1,CBL,DACT1,RFX5	4
			Cell Cycle	3.24E-02-7.61E-02	NEUROD1,TOB2,FOXG1	3
			Organ Development	3.75E-02-9.13E-02	NEUROD1,TOB2,CBL	3
			Connective Tissue Development and Function	4.36E-02-7.77E-02	TOB2,CBL,FOXG1	3
miR-409 family	bta-miR-409a	Temporal DE miRNA in RU	Tissue Development	3.86E-04-1.03E-01	USP9X,LRP8,VLDLR	3
			Tissue Morphology	4.22E-03-1.06E-01	TRA2B,LRP8,VLDLR	3
			Cell Morphology	1.29E-02-1.03E-01	LRP8,VLDLR,GNG12	3
			Cellular Development	3.44E-02-6.63E-02	USP9X,LRP8,CCDC6	3
miR-410 family	bta-miR-410	Temporal DE miRNA in IL	Cellular Development	4.31E-02-7.07E-02	LMTK2,PTX3,TMEFF2	3
miR-486 family	bta-miR-486	Temporal DE miRNA in MJ and RU	Cell Morphology	2.68E-02-9.57E-02	SMAD2,STK38L,FAT3,MID1,TOB1,ARID4B,PTEN,GABRB3,FOXO1,PIM1,DCC,ARL1,FBN1,DOCK3,EPB41L1	15
			Tissue Morphology	2.68E-02-9.55E-02	SMAD2,FOXO1,PIM1,FGF9,SOX12,CHST3,DCC,MID1,FAT3,FBN1,ARID4B,PTEN	12
			Cellular Development	2.68E-02-9.57E-02	SRSF3,SMAD2,FOXO1,PIM1,FGF9,PLAGL2,DCC,TOB1,TNK1,ARID4B,UNC5C,PTEN	12
			Tissue Development	2.68E-02-9.57E-02	SMAD2,FOXO1,PIM1,FGF9,CHST3,FAT3,DCC,FBN1,ARID4B,UNC5C,PTEN	11
			Cellular Growth and Proliferation	2.68E-02-9.57E-02	SRSF3,SMAD2,FOXO1,PIM1,FGF9,PLAGL2,DCC,TOB1,TNK1,UNC5C,PTEN	11
			Cell Cycle	2.68E-02-9.13E-02	FOXO1,PIM1,FGF9,PLAGL2,MYLK2,DCC,EPB41L1,TXLNG,RASSF3,PTEN	10
			Connective Tissue Development and Function	2.68E-02-9.57E-02	SMAD2,FOXO1,FGF9,PLAGL2,CHST3,TOB1,FBN1,DOCK3,TNK1,PTEN	10
			Skeletal and Muscular System Development and Function	2.68E-02-9.57E-02	AFF3,FOXO1,PIM1,FGF9,CHST3,MID1,TOB1,FBN1,PTEN	9
			Post-Translational Modification	2.68E-02-6.91E-02	SMAD2,TWF1,PIM1,MYLK2,STK38L,TNK1,PELI2,PTEN	8
			Nervous System Development and Function	2.68E-02-9.57E-02	GABRB3,FOXO1,STK38L,FAT3,MID1,DCC,UNC5C,PTEN	8
			Cell Death and Survival	3.35E-02-9.57E-02	SMAD2,FOXO1,PIM1,FGF9,PLAGL2,DCC,UNC5C,PTEN	8
			Cellular Assembly and Organization	2.68E-02-9.57E-02	TWF1,PIM1,STK38L,ARL1,DCC,FBN1,PTEN	7
			Cellular Movement	2.68E-02-9.26E-02	SMAD2,GABRB3,FOXO1,PIM1,FGF9,DCC,PTEN	7
			Hematological System Development and Function	2.68E-02-9.57E-02	SMAD2,FOXO1,PIM1,CHST3,ARID4B,PTEN	6
			Lymphoid Tissue Structure and Development	2.68E-02-9.36E-02	SMAD2,FOXO1,PIM1,FBN1,ARID4B,PTEN	6
			Organ Development	2.68E-02-6.91E-02	FOXO1,FGF9,FAT3,ARID4B,UNC5C,PTEN	6
			Small Molecule Biochemistry	2.68E-02-9.57E-02	SMAD2,FOXO1,FGF9,CHST3,DCC,PTEN	6
			Molecular Transport	4.54E-02-9.36E-02	FGF9,SLC4A8,MYLK2,TOB1,PTEN,RFFL	6
			Humoral Immune Response	2.68E-02-9.36E-02	SMAD2,FOXO1,PIM1,PTEN,ARID4B	5
			Lipid Metabolism	2.68E-02-9.57E-02	SMAD2,FOXO1,FGF9,DCC,PTEN	5
			Cellular Function and Maintenance	3.5E-02-9.57E-02	SMAD2,TWF1,FOXO1,SLC4A8,PTEN	5
			Hematopoiesis	3.5E-02-9.55E-02	SMAD2,FOXO1,PIM1,PTEN,ARID4B	5
			Cell Signaling	4.41E-02-7.09E-02	TWF1,FGF9,MYLK2,STK38L,PELI2	5
			Cellular Compromise	2.68E-02-7.96E-02	GABRB3,FOXO1,PIM1,PTEN	4
			Protein Trafficking	4.54E-02-7.31E-02	TWF1,FGF9,TOB1,RFFL	4
			Cell-To-Cell Signaling and Interaction	2.68E-02-9.57E-02	SMAD2,FOXO1,PTEN	3
			Gene Expression	2.68E-02-7.5E-02	FOXO1,PTEN,TXLNG	3
			Cell-mediated Immune Response	3.5E-02-8.84E-02	SMAD2,FOXO1,PTEN	3
			Organ Morphology	4.45E-02-6.65E-02	FGF9,FAT3,PTEN	3
miR-494 family	bta-miR-494	Temporal DE miRNA in MJ	Cellular Function and Maintenance	9.1E-03-5.63E-02	SHROOM3,LUM,IRAK3,TMEM135	4
			Hematological System Development and Function	1.32E-02-8.77E-02	LUM,IRAK3,WDR44	3
			Cell-To-Cell Signaling and Interaction	2.56E-02-8.36E-02	LUM,IRAK3,WDR44	3
			Cellular Movement	3.15E-02-8.77E-02	LUM,IRAK3,WDR44	3
miR-7 family	bta-miR-7	Temporal DE miRNA in MJ	Cell Death and Survival	3.01E-02-1.01E-01	RB1,NR4A3,RELA,CUL5,ARRB1,DHCR24,SOX6,GLI3,REST,KEAP1,PRKAA2,ACSL4,MAFK,SNCA,PSME3,GJC1,PRKCB	17
			Cellular Development	3.01E-02-1.01E-01	NR4A3,RB1,RELA,SOX6,GLI3,REST,ATRN,FAM213A,MAFK,SNCA,ARID4A,GJC1,RYK	13
			Cellular Function and Maintenance	4.35E-02-9.34E-02	RELA,RB1,ARRB1,GLI3,REST,PRKAA2,NLRX1,ARID4A,SNCA,PSME3,PRKCB	11
			Nervous System Development and Function	3.01E-02-9.51E-02	RB1,RELA,CUL5,SOX6,GLI3,REST,ATRN,SNCA,PSME3,RYK	10
			Cell Morphology	3.01E-02-9.51E-02	RB1,ARRB1,SLC6A9,REST,ATRN,PRKAA2,NLRX1,PSME3,SNCA	9
			Hematological System Development and Function	4.35E-02-1.01E-01	RB1,RELA,ARRB1,SOX6,ATRN,MKNK1,PRKAA2,ARID4A,PRKCB	9
			Tissue Development	3.01E-02-9.51E-02	RELA,RB1,CUL5,SOX6,GLI3,ATRN,IDE,ARID4A	8
			Cellular Growth and Proliferation	4.35E-02-1.01E-01	NR4A3,RB1,RELA,GLI3,MKNK1,ARID4A,GJC1	7
			Skeletal and Muscular System Development and Function	3.01E-02-8.92E-02	NR4A3,RB1,RELA,SOX6,REST,CKAP4	6
			Connective Tissue Development and Function	3.01E-02-9.51E-02	RB1,RELA,GLI3,SOX6,PSME3	5
			Hematopoiesis	4.35E-02-9.51E-02	RB1,RELA,SOX6,PRKAA2,ARID4A	5
			Cell-To-Cell Signaling and Interaction	4.35E-02-8.92E-02	RELA,ATRN,MKNK1,CKAP4,PRKCB	5
			Cellular Compromise	4.35E-02-8.92E-02	NR4A3,RB1,KEAP1,MAFK,SNCA	5
			Small Molecule Biochemistry	4.35E-02-9.31E-02	RELA,RB1,PRKAA2,SNCA,PRKCB	5
			Tissue Morphology	4.35E-02-9.31E-02	RB1,RELA,SLC6A9,PRKAA2,SNCA	5
			Cell Cycle	4.35E-02-9.51E-02	NR4A3,RB1,RELA,FOXN3	4
			Cellular Assembly and Organization	4.35E-02-1.01E-01	RB1,ARRB1,IDE,SNCA	4
			Cellular Movement	4.35E-02-1.01E-01	NR4A3,RELA,GLI3	3
			Molecular Transport	4.35E-02-9.31E-02	RB1,PRKAA2,PRKCB	3
miR-96/1271 family	bta-miR-1271	Temporal DE miRNA in MJ	Cell Death and Survival	1.45E-02-1.42E-01	ZFP36L1,FOXK2,EOMES,C8orf44-SGK3/SGK3,GPC3,INSM2,SERPINB2,CCNG1,CD1D,B4GALNT1,ZHX2,EZR,PPP3R1,FRS2,SH3KBP1,FOXF2,AHR,GNE,DEPTOR,PHIP,MITF,MED1,RALB,HBEGF,ITPR1,CREB3L2,CASP2,MAP2K3,TACC1,FN1,CACNA2D2,AIFM3,NTN4,DEPDC1,PTGER3,ARHGEF7,GPHN,EIF2S1,MTOR,GRID1,SDC2,STK17A,ZFAND5,PRKCE,OGDH,PURA,MAP2K1,SOX5,PNPLA8,MECOM,SGMS2,TRIB3,SH3BP5,HSPA2,GJC1,ZDHHC17,ERG,IVNS1ABP,FOXO1,SOX6,CALCR,CPEB1,MAP3K3,TC…	65
	bta-miR-96	Temporal DE miRNA in RU	Cellular Development	1.49E-02-1.42E-01	ZFP36L1,C8orf44-SGK3/SGK3,EOMES,HBP1,GPC3,CCNG1,CD1D,CD164,EZR,ZHX2,FRS2,AHR,FOXF2,CACNA1G,PHIP,RCOR1,DGKH,MITF,MED1,RALB,PGGT1B,HBEGF,MORF4L1,CREB3L2,IRF6,GCNT1,CASP2,SPEN,HAS2,MAP2K3,TACC1,CTC1,FN1,CACNA2D2,RAB23,SIN3B,GALNT2,SHOX2,KIAA2022,NEUROD4,MTOR,SDC2,E2F5,PRKCE,MAP2K1,SOX5,ARID5B,RGS2,MECOM,CACNB4,ADCY6,TRIB3,HSPA2,GJC1,ERG,IVNS1ABP,FOXO1,SOX6,CALCR,EBF3,CPEB1,ACVR2A,TCF7L2	63
			Gene Expression	3.17E-03-1.3E-01	WHSC1,JMJD1C,ZFP36L1,FOXK2,HBP1,C8orf44-SGK3/SGK3,EOMES,INSM2,ZHX1,ZHX2,NIPBL,SH3KBP1,FOXF2,AHR,PHIP,RCOR1,MED1,MITF,TBL1X,CREB3L2,IRF6,BRWD1,SPEN,MAP2K3,CREBRF,EIF4EBP2,PTGER3,SIN3B,SHOX2,EIF2S1,NEUROD4,MTOR,E2F5,PRKCE,PURA,MAP2K1,SOX5,ARID5B,RGS2,MECOM,TRIB3,ERG,IVNS1ABP,CHST1,FOXO1,SOX6,MORF4L2,CALCR,EBF3,CPEB1,MAP3K3,ACVR2A,TCF7L2,MSN,PRKAR1A	55
			Tissue Morphology	1.49E-02-1.42E-01	GPR124,FN1,SIN3B,ZFP36L1,GPHN,EOMES,SHOX2,C8orf44-SGK3/SGK3,GPC3,NEUROD4,SERPINB2,CCNG1,CD1D,B4GALNT1,MTOR,GRID1,PPP3R1,DDAH1,PRKCE,LIPG,PURA,MAP2K1,FRS2,FOXF2,AHR,SOX5,ARID5B,RGS2,MECOM,MITF,MED1,HBEGF,MORF4L1,CREB3L2,IRF6,CHST1,FOXO1,SOX6,GCNT1,CASP2,CALCR,HAS2,CELSR3,TCF7L2,ACVR2A,PRKAR1A	46
			Tissue Development	1.49E-02-1.42E-01	CACNA2D2,FN1,ZFP36L1,RAB35,EOMES,SHOX2,NEUROD4,B4GALNT1,MTOR,EZR,PRKCE,LIPG,NIPBL,FRS2,MAP2K1,AHR,SOX5,ARID5B,RGS2,MECOM,MTSS1,MITF,MED1,NLGN2,CACNB4,HBEGF,HSPA2,GJC1,ERG,CREB3L2,FOXO1,SOX6,HAS2,CPEB1,MAP3K3,ACVR2A,TCF7L2,PRKAR1A	38
			Connective Tissue Development and Function	3.17E-03-1.42E-01	CTC1,FN1,SHOX2,CCNG1,MTOR,GRID1,EZR,ZFAND5,PRKCE,PURA,FRS2,MAP2K1,GNG12,FOXF2,AHR,SOX5,ARID5B,RGS2,MTSS1,MED1,MITF,PGGT1B,RALB,HBEGF,TRIB3,MORF4L1,CREB3L2,IVNS1ABP,SOX6,FOXO1,REV1,CALCR,HAS2,MAP2K3,TCF7L2,TACC1,PRKAR1A	37
			Cellular Assembly and Organization	3E-02-1.35E-01	AIFM3,FN1,CACNA2D2,RAB23,ARHGEF7,RAB35,TSGA10,HBP1,ODF2,MTOR,HOOK3,SDC2,EZR,PRKCE,BAI3,PURA,MAP2K1,AHR,SOX5,RGS2,PHIP,MTSS1,NLGN2,PGGT1B,CACNB4,RALB,SGMS2,GAN,GJC1,SPAST,ERG,SLC22A5,HAS2,TACC1,ANKRD27,MSN	36
			Cellular Movement	3.17E-03-1.42E-01	FN1,NTN4,PTGER3,NUS1,GALNT2,GPC3,NEUROD4,SERPINB2,CD1D,SDC2,EZR,ZFAND5,E2F5,PRKCE,FRS2,MAP2K1,SH3KBP1,GNG12,AHR,ARID5B,MTSS1,MITF,RALB,PGGT1B,HBEGF,PTP4A1,ERG,IRF6,CHST1,FOXO1,GCNT1,EBF3,HAS2,MAP2K3,PRKAR1A	35
			Skeletal and Muscular System Development and Function	1.49E-02-1.42E-01	RGS2,CACNA2D2,MECOM,MED1,RAB23,RAB35,CACNB4,ADCY6,HBEGF,TRIB3,HBP1,SHOX2,GPC3,SC5D,IRF6,CREB3L2,CD164,MTOR,B4GALNT1,SOX6,FOXO1,PPP3R1,NIPBL,MAP2K1,SOX5	25
			Small Molecule Biochemistry	3E-02-1.42E-01	GNE,SLC35A1,FN1,DGKH,SLC6A9,AK3,GALNT2,ST6GALNAC3,SGMS2,NUS1,SC5D,IRF6,CD164,CD1D,SLC25A42,B4GALNT1,REV1,SDC2,CASP2,SLC22A5,LIPG,AHR,ST8SIA3	23
			Cell-To-Cell Signaling and Interaction	3E-02-1.42E-01	CACNA1G,CACNA2D2,FN1,SLC6A9,PTGER3,NLGN2,GRIA1,CACNB4,HBEGF,SLC1A1,HBP1,RAPGEF4,GJC1,CD1D,MTOR,FOXO1,SDC2,CALCR,PRKCE,MAP2K3,LIPG,MAP2K1	22
			Lipid Metabolism	3E-02-1.42E-01	DGKH,FN1,ST6GALNAC3,SGMS2,NUS1,SC5D,CD1D,B4GALNT1,SDC2,CASP2,SLC22A5,LIPG,AHR,ST8SIA3	14
			Cellular Compromise	3E-02-1.26E-01	FN1,MTSS1,PGGT1B,HBEGF,EOMES,ITPR1,ERG,CD1D,HOOK3,MTOR,FOXO1,PRKCE,MAP2K1,AHR	14
			Organ Morphology	1.49E-02-1.42E-01	FN1,CASP2,HAS2,C8orf44-SGK3/SGK3,SC5D	5
miR-99/100 family	bta-miR-100	Temporal DE miRNA in RU and MJ	Gene Expression	1.86E-02-2.27E-02	FGFR3,BAZ2A,FZD8,MTOR,NOX4,SMARCA5,AGO2,CTDSPL,FZD5,NIPBL,HES7,HOXA1	12
	bta-miR-99a	Temporal DE miRNA in MJ	Cellular Development	1.86E-02-8.43E-02	FGFR3,FZD8,NOX4,MTOR,TRIB2,ADCY1,SMARCA5,CTDSPL,AGO2,FZD5,HOXA1	11
	bta-miR-99b	Temporal DE miRNA in MJ	Cellular Growth and Proliferation	1.86E-02-8.43E-02	FGFR3,FZD8,ST5,MTOR,NOX4,ADCY1,SMARCA5,AGO2,CTDSPL,FZD5,HOXA1	11
			Tissue Development	1.86E-02-8.31E-02	FGFR3,NOX4,MTOR,SMARCA5,AGO2,NIPBL,FZD5,HES7,HOXA1	9
			Cellular Function and Maintenance	1.86E-02-8.31E-02	FGFR3,FZD8,NOX4,MTOR,SMARCA5,FZD5,SEH1L	7
			Tissue Morphology	1.86E-02-8.07E-02	FGFR3,MTOR,SMARCA5,AGO2,FZD5,HOXA1	6
			Cellular Assembly and Organization	2.27E-02-8.07E-02	BAZ2A,NOX4,MTOR,SMARCA5,NIPBL,SEH1L	6
			Small Molecule Biochemistry	2.5E-02-8.65E-02	FGFR3,HS3ST3B1,NOX4,MTOR,ADCY1,SLC44A1	6
			Nervous System Development and Function	1.86E-02-8.07E-02	FGFR3,FZD8,MTOR,ADCY1,HOXA1	5
			Cell Death and Survival	1.86E-02-8.15E-02	FGFR3,MTOR,NOX4,SMARCA5,AGO2	5
			Hematological System Development and Function	1.86E-02-7.67E-02	FZD8,MTOR,SMARCA5,AGO2,FZD5	5
			Hematopoiesis	1.86E-02-7.67E-02	FZD8,MTOR,SMARCA5,AGO2,FZD5	5
			Lymphoid Tissue Structure and Development	1.86E-02-7.67E-02	FGFR3,FZD8,MTOR,AGO2,FZD5	5
			Connective Tissue Development and Function	2.5E-02-7.79E-02	FGFR3,ST5,MTOR,NOX4,TRIB2	5
			Cell-To-Cell Signaling and Interaction	1.86E-02-8.31E-02	ST5,NOX4,MTOR,FZD5	4
			Cell Cycle	2.5E-02-7.79E-02	BAZ2A,ST5,MTOR,SMARCA5	4
			Molecular Transport	2.5E-02-8.07E-02	NOX4,MTOR,PPP1CB,SLC44A1	4
			Cell Morphology	1.86E-02-8.15E-02	FGFR3,NOX4,MTOR	3
			Cell-mediated Immune Response	1.86E-02-7.67E-02	FZD8,MTOR,FZD5	3
			Post-Translational Modification	2.5E-02-8.65E-02	FGFR3,HS3ST3B1,MTOR	3
			Skeletal and Muscular System Development and Function	2.5E-02-7.96E-02	FGFR3,NOX4,NIPBL	3
miR-1246 family	bta-miR-1246	Temporal DE miRNA in RU	No significant function
miR-125 family	bta-miR-125a	Temporal DE miRNA in RU	No significant function
miR-127 family	bta-miR-127	Temporal DE miRNA in IL	No significant function
miR-147 family	bta-miR-147	Temporal DE miRNA in RU	No significant function
miR-183 family	bta-miR-183	Temporal DE miRNA in MJ	No significant function
miR-375 family	bta-miR-375	Temporal DE miRNA in RU	No significant function
miR-423 family	bta-miR-423-5p	Temporal DE miRNA in IL	No significant function
